# Supplementary material for: Characterization and clinical use of inflammatory cerebrospinal fluid protein markers in Alzheimer’s disease
Source: Springer Nature journal article supplement (doi:10.1186/s13195-018-0353-3), 2018-02-26

# Technical supplement: Initial test phase results

| <b>Table of Contents:</b>                              | <b>Page</b> |
|--------------------------------------------------------|-------------|
| <b>1. Methods</b>                                      | 1           |
| i. List of assays                                      | 1           |
| ii. Testing procedures                                 | 2           |
| iii. Evaluation criteria                               | 2           |
| <b>2. Results</b>                                      | 3           |
| i. Classification of assays                            | 3           |
| ii. Grouping of assays                                 | 4           |
| iii. Explanatory results (example with figure legends) | 5           |
| iv. Single analytes results                            | 6 - 54      |

## 1. Methods:

### i. List of assays

- V-PLEX Human Biomarker 40-Plex Kit, K15209D, Mesoscale Diagnostics LLC
  - Consists of 5 different multiplex kits:
  - V-PLEX Chemokine Panel 1 (human) Kit, K15047D: Eotaxin, Eotaxin-3, IL-8, IL-8 (HA), IP-10, MCP-1, MCP-4, MDC, MIP-1 $\alpha$ , MIP-1 $\beta$ , TARC
  - V-PLEX Proinflammatory Panel 1 (human), K15049D: IFN- $\gamma$ , IL-10, IL-12p70, IL-13, IL-1 $\beta$ , IL-2, IL-4, IL-6, IL-8, TNF- $\alpha$
  - V-PLEX Cytokine Panel 1 (human), K15050D: GM-CSF, IL-12/IL-23p40, IL-15, IL-16, IL-17A, IL-1 $\alpha$ , IL-5, IL-7, TNF- $\beta$ , VEGF-A
  - V-PLEX Angiogenesis Panel 1 (human), K15190D: FGF (basic), Flt-1/VEGFR-1, PlGF, Tie-2, VEGF-A, VEGF-C, VEGF-D
  - V-PLEX Vascular Injury Panel 2 (human), K15198D: CRP, ICAM-1, SAA, VCAM-1
- Human MIF Kit, K151LVD, Mesoscale Diagnostics LLC
- Human Complement C3a des Arg ELISA Kit, ab133037, Abcam plc
- Human Complement C1q ELISA kit, ab170246, Abcam plc
- Human Complement Component C5a DuoSet® ELISA, DY2037, R&D Systems Inc.
- Human IL-1 RAcP/IL-1 R3 DuoSet® ELISA, DY676, R&D Systems Inc.
- Human soluble TREM2 was analyzed using the protocol established by Suárez-Calvet et. al., “sTREM2 cerebrospinal fluid levels are a potential biomarker for microglia activity in early-stage Alzheimer’s disease and associate with neuronal injury markers.” EMBO Mol Med 2016;8:466-476.
- Human Mrp8/14 heterodimer was analyzed by the group of Prof. Dr. Thomas Vogl, Institut für Immunologie, Medizinische Fakultät, Westfälische Wilhelms-Universität Münster, Germany.

## ii. Testing procedures

1. Regular standard curve for comparison purposes
2. Spike-in of standard curve in a CSF/diluent mixture
  - The spike in was designed in a way that the concentrations of the standard protein would be the same as for the regular standard curve. In example, if a regular standard would be a 8-point curve ranging from 2000 to 30 pg/ml, the spike-in would also be a 8-point curve ranging from 2000 to 30 pg/ml.
  - In contrast to the regular standard, the spike-in curve was prepared not in regular assay diluent, but in a mixture of CSF with the assay diluent. Hence, readouts of the spike-in curve would be modified by CSF derived, endogenous protein. The CSF/Diluent mixture was usually done in a ratio of 1:1, except for those assays where vendors gave specific instructions on how to dilute the CSF (e.g., for C1q a dilution of 1:300 was provided by the vendor and applied in the spike-in).
  - The concept was that this procedure would allow to test for matrix effects derived from CSF. More importantly, if there are endogenous levels of a certain protein in CSF, the signal of the spiked-in curve should be increased over that of the regular standard curve.
  - Furthermore, as each spike-in was prepared as a 8-point-curve, there would be 8 data points available to calculate CSF endogenous levels by subtracting the known spiked-in standard concentrations. Theoretically, this should provide the same result for all data points of the spiked-in standard curve.
3. Dilution series of a pooled CSF sample to determine dilution linearity and optimal dilution range.
4. In a second experiment, a small set of ND, MCI and AD test samples (n = 6) was applied to the assays to obtain some basic information on the distribution of values obtained from actual research samples. Any significant difference found between test samples would be valued as a positive feature of the assay.

## iii. Evaluation criteria

- Evaluation classified assays as follows:
- **Passed:** Assay was fully functional, samples were detectable within the quantitative range and had low technical variance
- **Not passed:** Proteins were undetectable with the assay used due to concentrations below quantitative or detection range, high variance, and failed spike-in-experiments
- **Borderline:** Sample concentrations were at borderline or undetectable, but spike-in tests suggested that it might be possible to calculate concentrations if a known dose of protein would be added to samples. In concept, this spiked-in protein would mix with the CSF protein to elevate signal levels into the quantitation range. After measurements, CSF concentrations would be calculated by subtracting the known spiked-in dose from the result. A prerequisite was that the concentrations calculated from the spiked-in standard curve in the test experiment were the same over a range of at least 4 different spiked in concentrations.

## 2. Results:

### i. Classification of assays

#### **Passed**

C1q

C3a des Arg

CRP

ICAM-1

II-1 RAP/II-1 R3

II-8/CXCL8

IP-10/CXCL10

MCP-1/CCL2

MIF

MIP-1 $\beta$ /CCL4

PIGF

SAA

TREM2

VCAM-1

#### **Borderline**

Flt-1/VEGFR1

II-5

II-6

II-7

II-12B/II-12p40

II-15

II-16

MDC/CCL22

TARC/CCL17

VEGF

#### **Not passed**

C5a

bFGF

Eoataxin

Eotaxin-3

GM-CSF

IFN- $\gamma$

II-1 $\alpha$

II-1 $\beta$

II-2

II-4

II-10

II-12p70

II-13

II-17A

MCP-4

MIP-1 $\alpha$

Mrp8/14

Tie-2

TNF- $\alpha$

TNF- $\beta$

VEGF-C

VEGF-D

ii. Grouping of assays

The table lists the protein assays selected based on the initial test phase together with the respective analytical properties. Assays were run as multiplexes (M) or singleplexes (S) depending on the specific diluents, dilution factors and detection ranges, which differed significantly between the target proteins. The overall aim of the setup was to obtain sample signals above lower limit of detection (LLOD) or – preferably – above lower limit of quantitation (LLOQ) and well within the assays range. Proteins at borderline of detection (indicated by asterisk \*) were run in spike-in-setups to ensure that signals of low-abundant proteins are within detection range.

| Protein                | Setup | LLOD (pg/ml) | LLOQ (pg/ml) | Standard range (pg/ml)                   | Dilution (x-fold) | Spike-In (pg/ml) | Mean CV (%) |
|------------------------|-------|--------------|--------------|------------------------------------------|-------------------|------------------|-------------|
| <b>VEGF*</b>           | M     | 0.48         | 5.0          | 0.48 - 1970                              | 2                 | 7.38             | 4.8         |
| <b>sVEGFR-1/Flt-1*</b> |       | 0.56         | 10.0         | 1.99 – 8170                              |                   | 35.2             | 3.6         |
| <b>MCP-1/CCL2</b>      | M     | 0.09         | 1.09         | 0.11 – 448.0                             | 10                | No               | 4.4         |
| <b>IP-10/CXCL10</b>    |       | 0.37         | 1.37         | 0.59 - 2400                              |                   |                  | 3.0         |
| <b>Il-6*</b>           | M     | 0.06         | 1.58         | 0.18 - 745                               | 2                 | 0.76             | 2.8         |
| <b>Il-8/CXCL8</b>      |       | 0.04         | 1.13         | 0.16 – 666                               |                   | 2.57             | 2.1         |
| <b>SAA</b>             | M     | 10.9         | 54.1         | 14.0 - 218x10E <sup>3</sup>              | 10                | No               | 5.2         |
| <b>CRP</b>             |       | 1.33         | 27.6         | 12.0 - 195x10E <sup>3</sup>              |                   |                  | 1.8         |
| <b>sICAM-1/CD54</b>    |       | 1.03         | 6.4          | 4.0 – 61.4x10E <sup>3</sup>              |                   |                  | 3.9         |
| <b>sVCAM-1/CD106</b>   |       | 6.9          | 37.6         | 3.0 – 51.7x10E <sup>3</sup>              |                   |                  | 2.2         |
| <b>MIF</b>             | S     | 2.4          | N.A.         | 3.7 – 15.0x10E <sup>3</sup>              | 5                 | No               | 2.5         |
| <b>C1q</b>             | S     | 30.0         | N.A.         | 10.0 – 40.0x10E <sup>3</sup>             | 300               | No               | 3.8         |
| <b>C3aDesArg</b>       | S     | N.A.         | N.A.         | 31.3 – 20.0x10E <sup>3</sup>             | 10 - 50           | No               | 5.7         |
| <b>sII-1RAcP</b>       | S     | N.A.         | N.A.         | 31.3 - 2000                              | 25 - 50           | No               | 3.5         |
| <b>sTREM2</b>          | S     | N.A.         | N.A.         | 8x10 <sup>3</sup> – 200x10E <sup>3</sup> | 4                 | No               | 1.5         |

iii. Explanatory results (example with figure legends)

We evaluated each assay to estimate if it would provide reliable data in CSF analysis. Evaluation included the assays overall performance, variance of duplicate measurements, spike-in tests, a CSF dilution series and a limited number of test research samples. This page serves as an explanatory example for the results that are provided for each single protein on page 7-54.

**MIF (Singleplex)**

Protein name and assay setup

**Evaluation (classification): Passed**

Optimal dilution factor (estimated from dilution series) is 5x

- Spike-In-Curve (red) has positive difference to standard curve (blue)
- Spike in Concentrations are linear in range of standard 4 – 8 at 1000 pg/ml (2x Dilution)
- Sample concentrations > LLOD (here: 2.4 pg/ml)
- Sample concentrations in linear range
- All QC parameters (detectability of samples, variance of coefficient CV < 20%) passed
- No significant difference between test samples

A Summary of test phase results and the classification of the assay as “passed”, “borderline” or “not passed”.

Signal of regular standard curve (blue), the standard curve spiked into the CSF/diluent mixture (red) and the CSF sample dilution series (black), plotted against the concentration of the standard protein

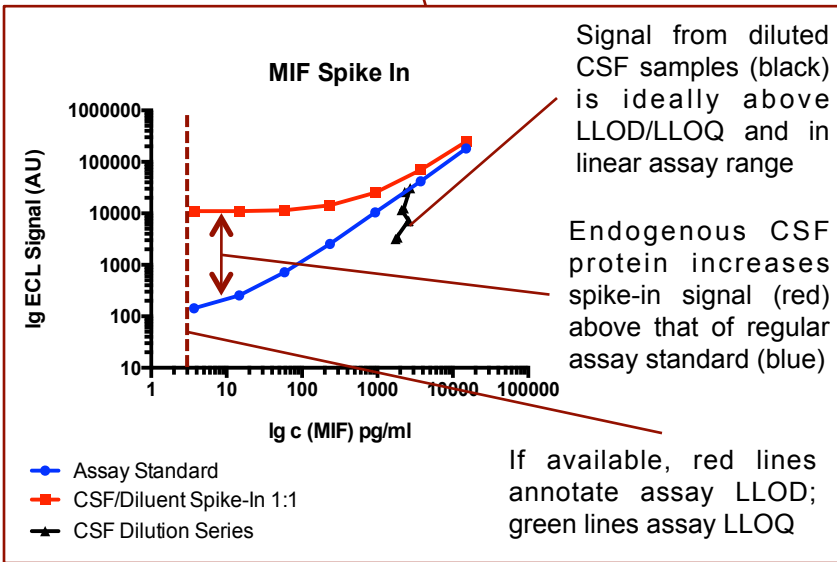

Protein concentrations recalculated from the standard spiked into CSF/diluent mixture (y-axis) plotted against the concentration of the spiked-in standard (x-axis). Ideally, recalculated concentrations should be identical, positive values.

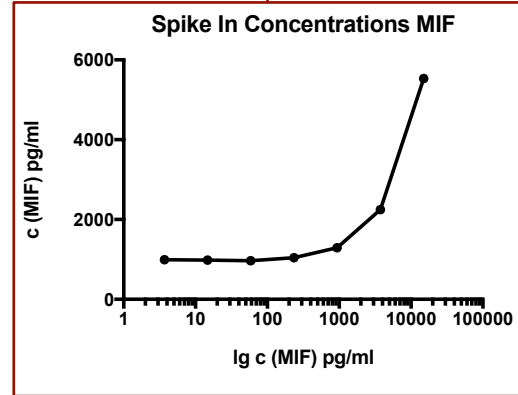

Protein concentrations recalculated from the CSF dilution series, plotted against used dilution factors. Ideally, calculated concentrations should be identical for all dilutions

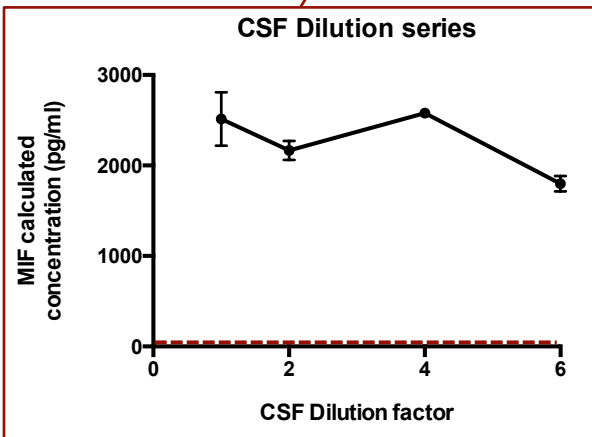

Data from the n = 6 test sample cohort, primarily used to estimate inter-individual variances and ensure research samples are in detection range

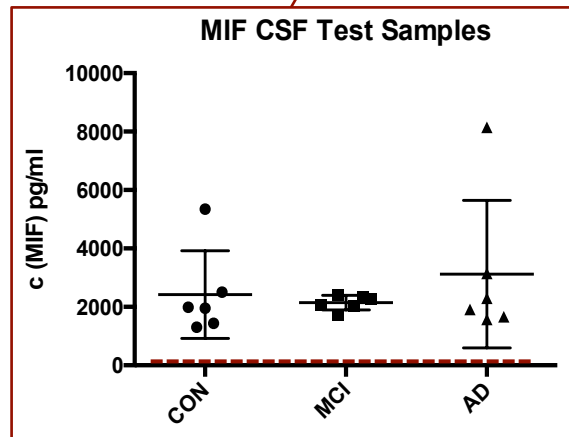

iv. Table of contents: Single analytes results

| <b>Analyte</b>                         | <b>Page</b> | <b>Analyte</b>                      | <b>Page</b> |
|----------------------------------------|-------------|-------------------------------------|-------------|
| C1q                                    | 7           | Il-13                               | 31          |
| C3a des Arg                            | 8           | Il-15                               | 32          |
| C5a                                    | 9           | Il-16                               | 33          |
| CRP                                    | 10          | Il-17A                              | 34          |
| bFGF                                   | 11          | IP-10                               | 35          |
| Eotaxin                                | 12          | MCP-1                               | 36          |
| Eotaxin-3                              | 13          | MCP-4                               | 37          |
| Flt-1                                  | 14          | MDC                                 | 38          |
| GM-CSF                                 | 15          | MIF                                 | 39          |
| ICAM-1                                 | 16          | MIP-1 $\alpha$                      | 40          |
| IFN- $\gamma$                          | 17          | MIP-1 $\beta$                       | 41          |
| Il-1 $\alpha$                          | 18          | Mrp8/14                             | 42          |
| Il-1 $\beta$                           | 19          | PIGF                                | 43          |
| Il-1RAcP                               | 20          | SAA                                 | 44          |
| Il-2                                   | 21          | TARC                                | 45          |
| Il-4                                   | 22          | Tie-2                               | 46          |
| Il-5                                   | 23          | TNF- $\alpha$                       | 47          |
| Il-6                                   | 24          | TNF- $\beta$                        | 48          |
| Il-7                                   | 25          | TREM2                               | 49          |
| Il-8 (Chemokine Multiplex)             | 26          | VCAM-1                              | 50          |
| Il-8 (Proinflammatory Panel Multiplex) | 27          | VEGF (Cytokine Panel Multiplex)     | 51          |
| Il-10                                  | 28          | VEGF (Angiogenesis Panel Multiplex) | 52          |
| Il-12p40                               | 29          | VEGF-C                              | 53          |
| Il-12p70                               | 30          | VEGF-D                              | 54          |

iv. Single analytes results

**Complement C1q (colorimetric singleplex)**

**Evaluation: Passed**

Optimal dilution factor is 300x (confirmed vendor specification)

- Spike-In-Curve has positive difference to standard curve
- Spike in Concentrations are linear in range of standard 3 – 8 at 1.0 ng/ml (300x Dilution)
- Sample concentrations > LLOD (0.03 ng/ml)
- Sample concentrations in linear range if diluted
- No significant difference between test samples

**A) Spike In Curve**

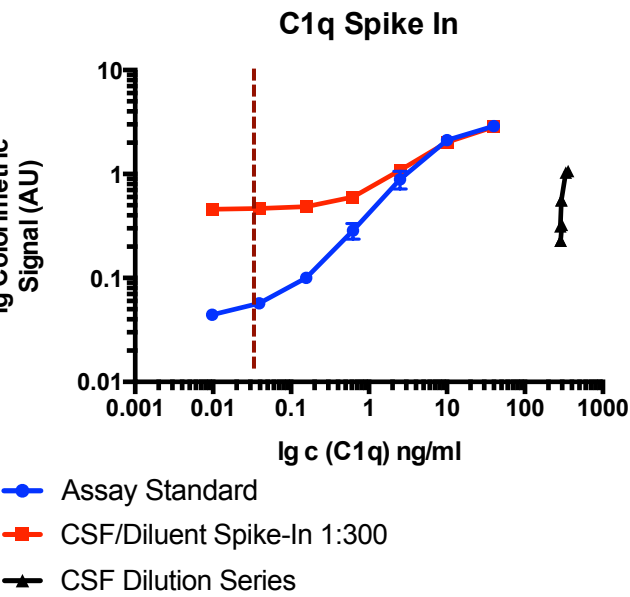

**B) Recalculated concentrations curve**

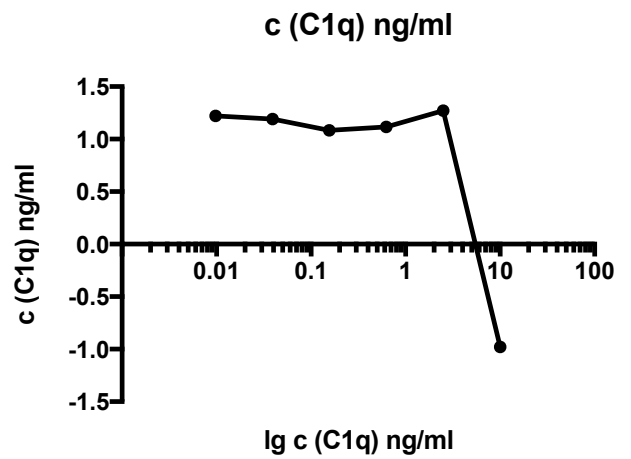

**C) CSF dilution series**

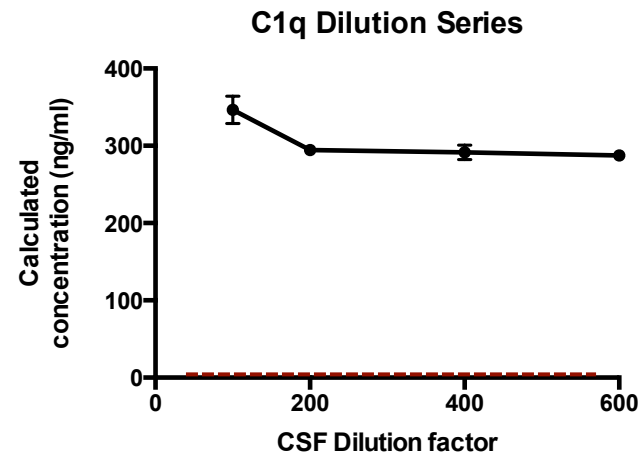

**D) Test sample results**

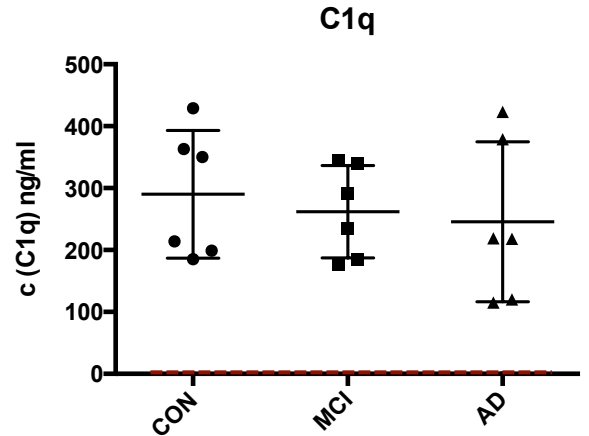

iv. Single analytes results

Complement C3a des Arg (competitive colorimetric singleplex)

Evaluation: **Passed**

Optimal dilution factor is 50x

- Spike-In-Curve has negative difference to standard curve (competitive assay; less signal equals higher concentrations)
- Sample concentrations in linear range if diluted
- One of the research test samples has CV > 20% while average CV is < 10%
- No significant difference between test samples

A) Spike In Curve

C3a des Arg Spike In

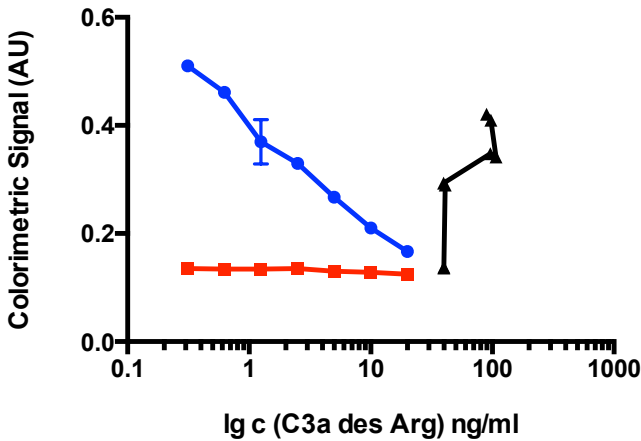

- Assay Standard
- CSF/Diluent Spike-In 1:4
- CSF Dilution Series

B) Recalculated concentrations curve

In the 1:4 CSF/diluent mixture used, C3a concentrations were above detection limits as this complement factor is highly abundant in CSF.

C) CSF dilution series

C3a des Arg Dilution Series

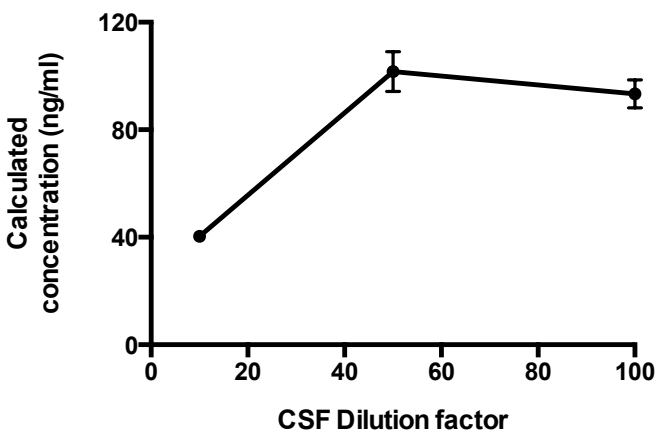

D) Test sample results

C3a Samples

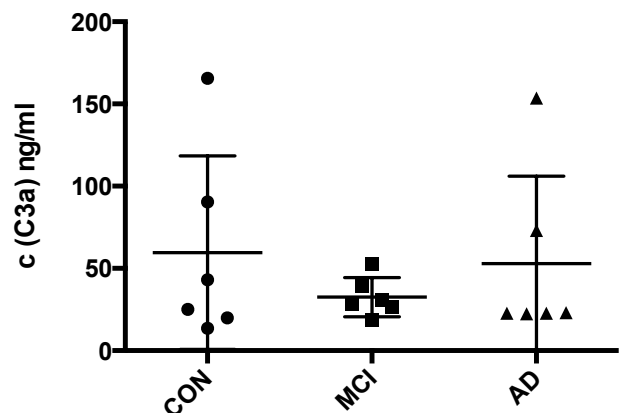



iv. Single analytes results

Complement C5a (colorimetric singleplex)

Evaluation: **Not passed**

Only few samples detectable, spike-in setup performed to unstable

- Spike-In-Curve overlaps with standard curve
- Spike-In concentrations are nonlinear
- Samples undetectable in dilution series
- Majority of samples fails QC parameters
- No significant difference between test samples

A) Spike In Curve

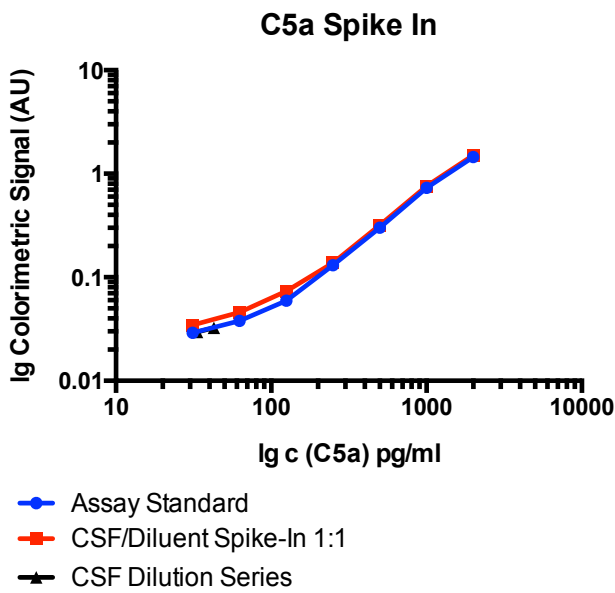

B) Recalculated concentrations curve

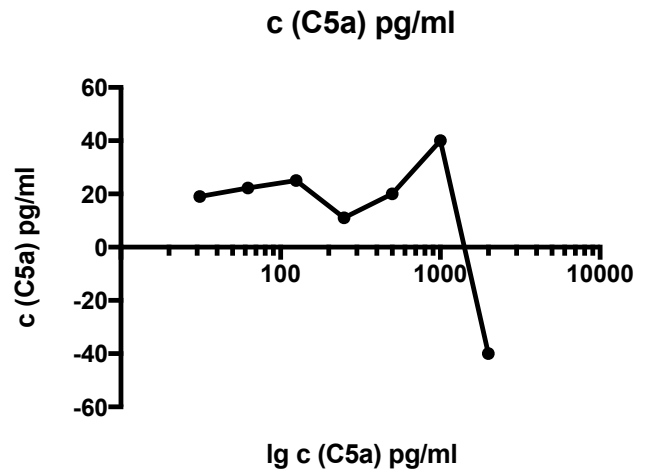

C) CSF dilution series

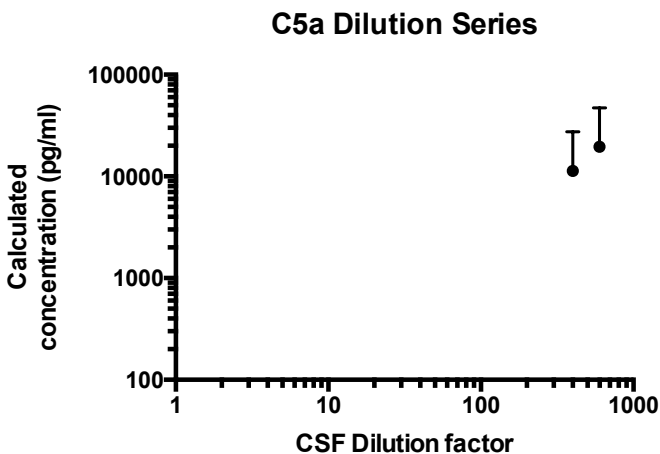

D) Test sample results

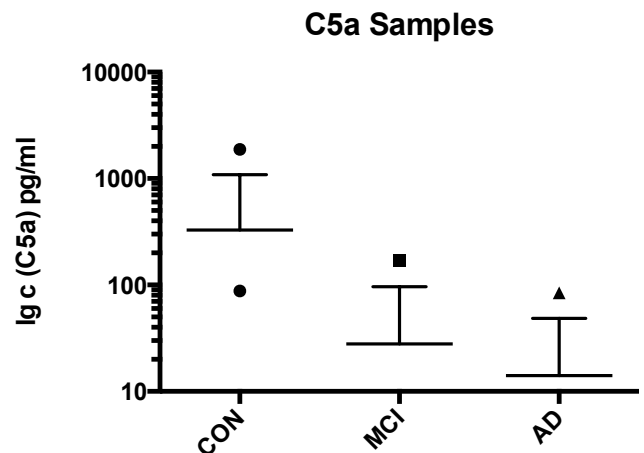



iv. Single analytes results

**bFGF (electrochemiluminescence multiplex; angiogenesis panel)**

**Evaluation: Not passed**

Samples not detectable

- Spike-In-Curve has small but positive difference to standard curve
- Spike-In concentrations are nonlinear
- Sample concentrations < LLOQ (2.6 pg/ml)
- No significant difference between test samples; samples < LLOQ in all groups

A) Spike In Curve

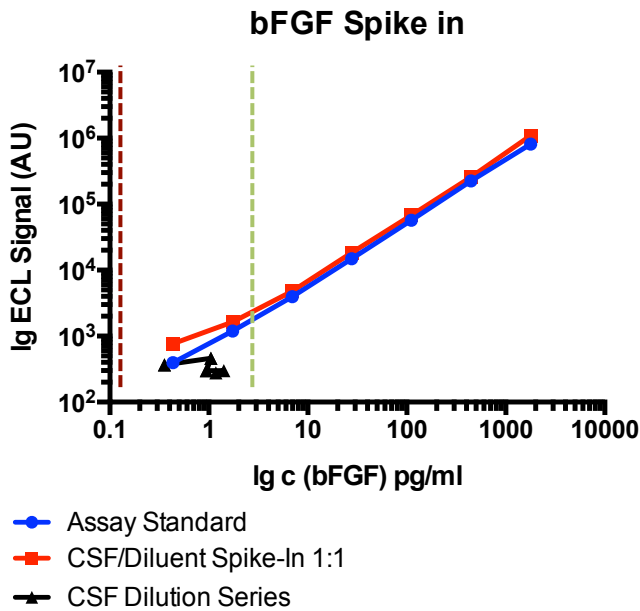

B) Recalculated concentrations curve

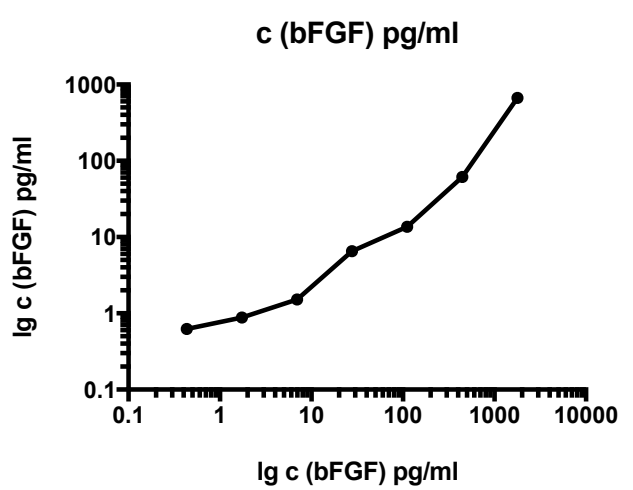

C) CSF dilution series

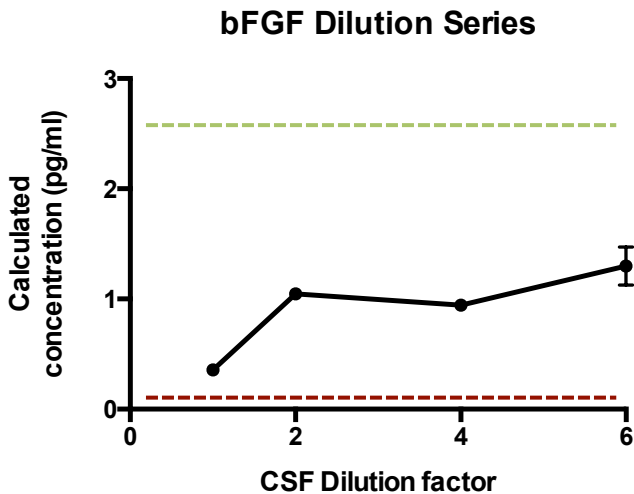

D) Test sample results

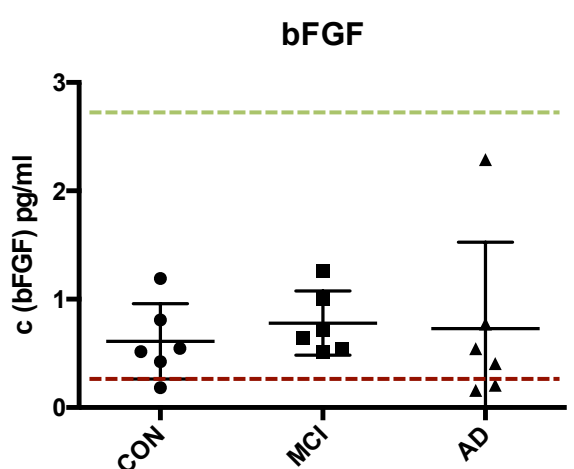

iv. Single analytes results

Eotaxin (electrochemiluminescence multiplex; chemokine panel)

Evaluation: **Not passed**

Samples not detectable

- Spike-In-Curve overlaps with standard curve
- Spike-In Concentrations are nonlinear
- Test sample concentrations overlap with LLOQ (12.3 pg/ml) in all groups
- No significant difference between test samples

A) Spike In Curve

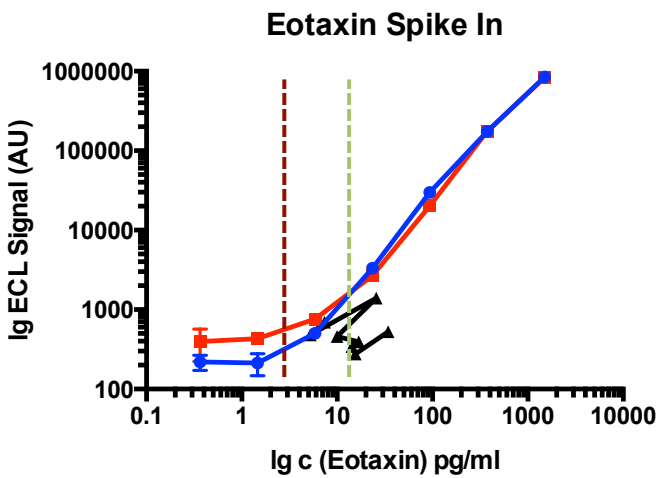

- Assay Standard
- CSF/Diluent Spike-In 1:1
- CSF Dilution Series

B) Recalculated concentrations curve

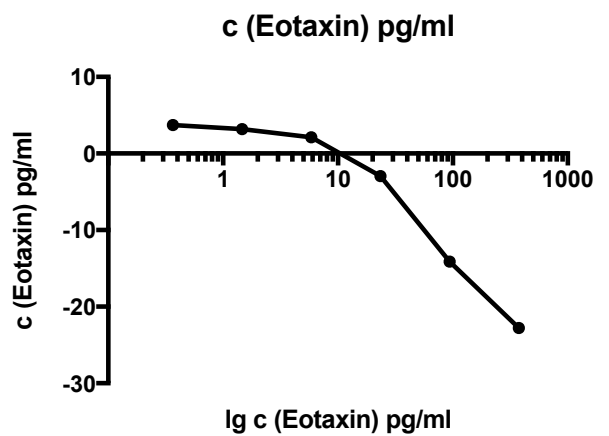

C) CSF dilution series

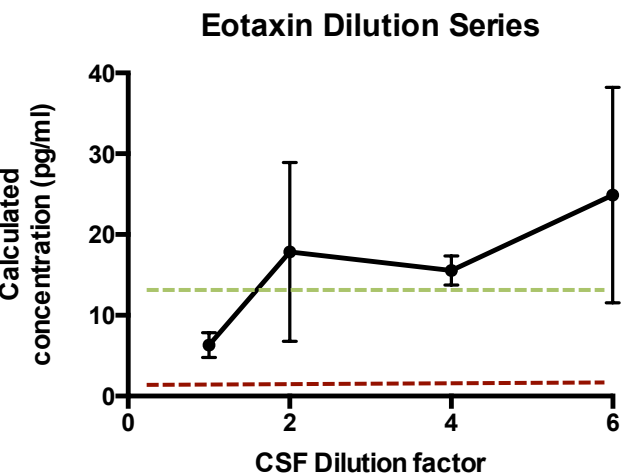

D) Test sample results

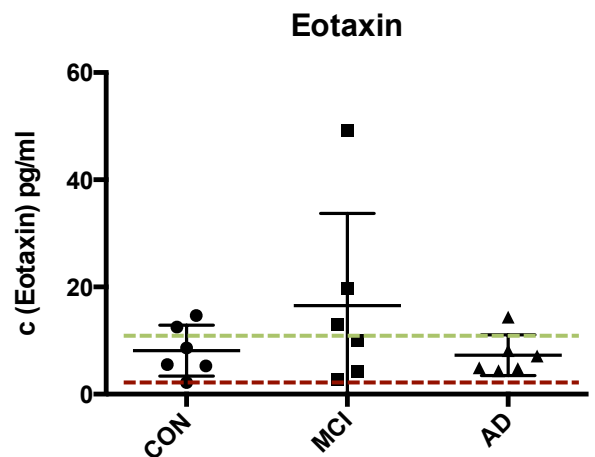

iv. Single analytes results

Eotaxin-3 (electrochemiluminescence multiplex; chemokine panel)

Evaluation: **Not passed**

Samples not detectable

- Spike-In Curve overlaps with standard curve
- Spike-In Concentrations are nonlinear
- Test sample concentrations < LLOQ (10.2 pg/ml) in all groups
- No significant difference between test samples

A) Spike In Curve

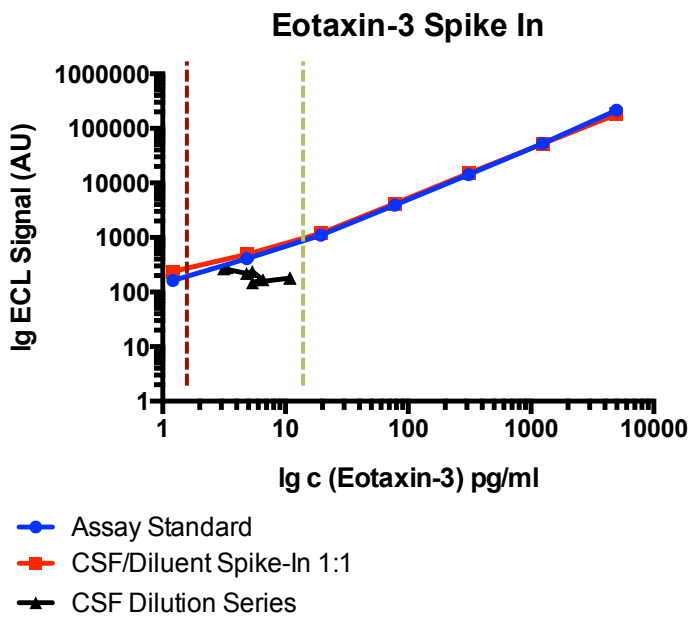

B) Recalculated concentrations curve

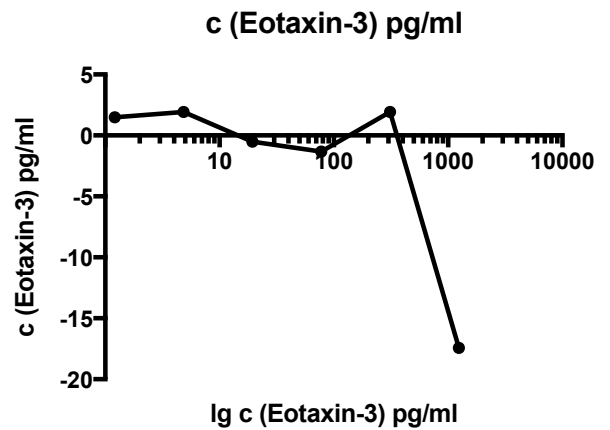

C) CSF dilution series

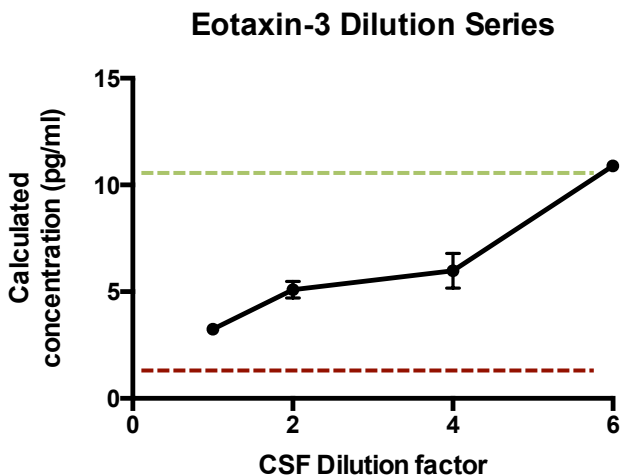

D) Test sample results

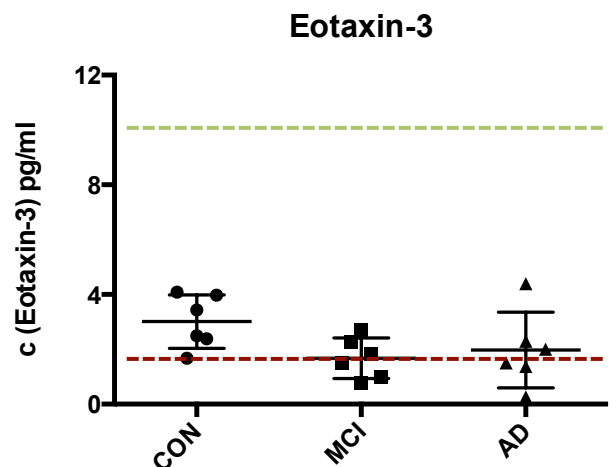

iv. Single analytes results

Flt-1/VEGFR (electrochemiluminescence multiplex; angiogenesis panel)

Evaluation: **Passed**

Optimal dilution factor is 2x

- Spike-In-Curve partly overlaps with standard curve
- Spike in Concentrations are linear in range of standard 4 – 8 at 10 pg/ml (2x Dilution)
- Sample concentrations > LLOQ (10.0 pg/ml)
- Sample concentrations in linear range
- No significant difference between test samples

A) Spike In Curve

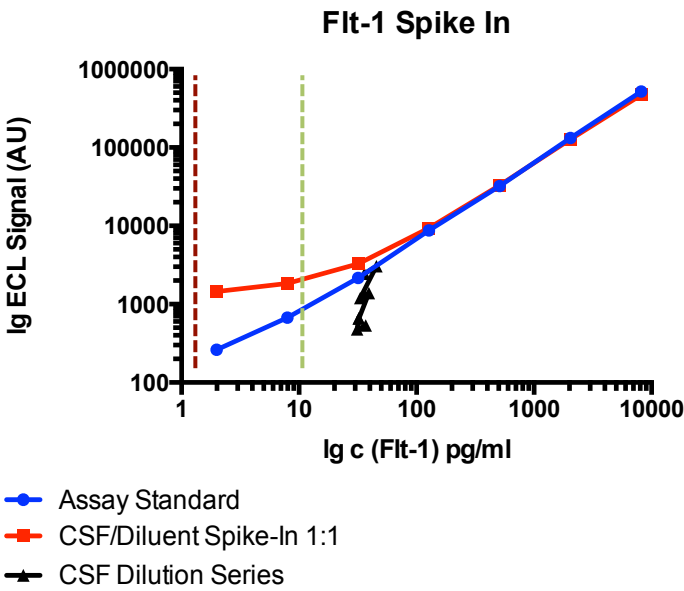

B) Recalculated concentrations curve

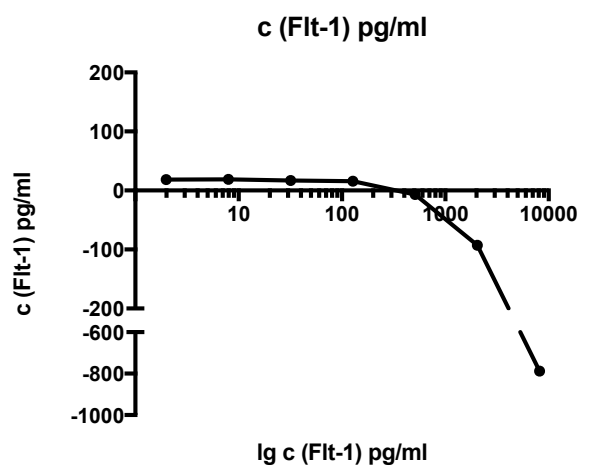

C) CSF dilution series

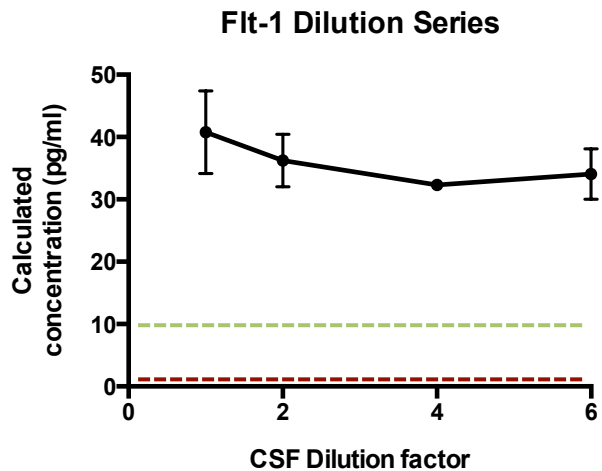

D) Test sample results

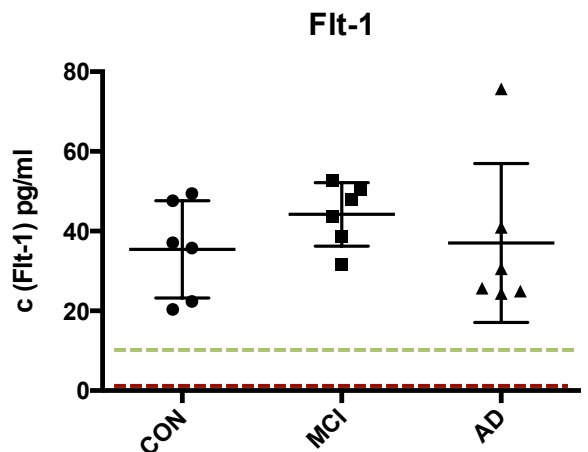

iv. Single analytes results

GM-CSF (electrochemiluminescence multiplex; cytokine panel)

Evaluation: **Not passed**

Samples not detectable

- Spike-In-Curve overlaps with standard curve
- Spike in Concentrations close to 0 in range of standard 3 – 8 (2x Dilution)
- Sample concentrations < LLOQ (1.9 pg/ml)
- No significant difference between test samples

A) Spike In Curve

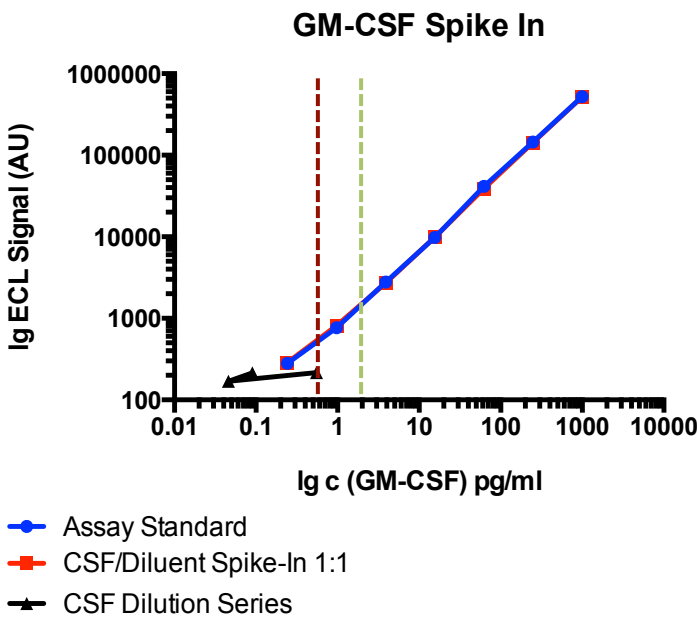

B) Recalculated concentrations curve

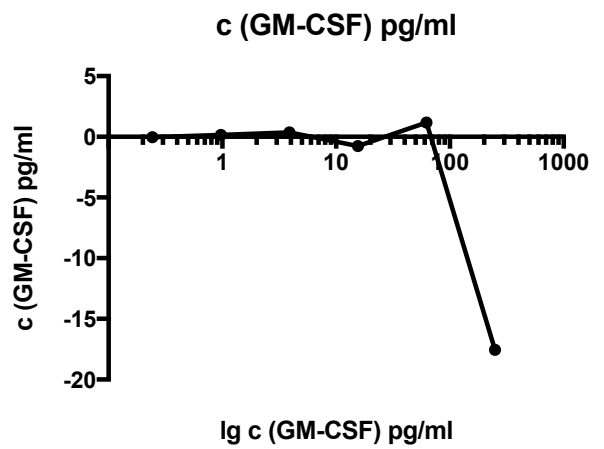

C) CSF dilution series

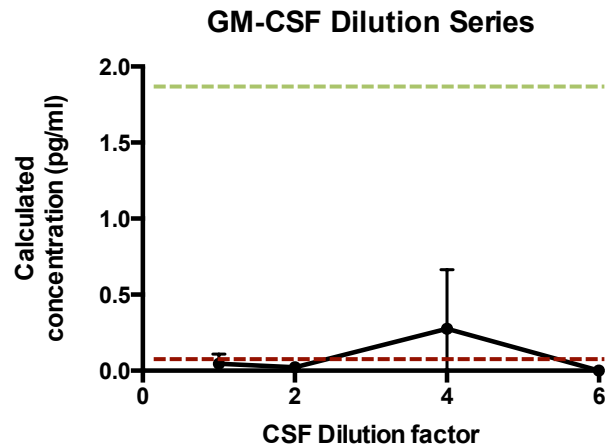

D) Test sample results

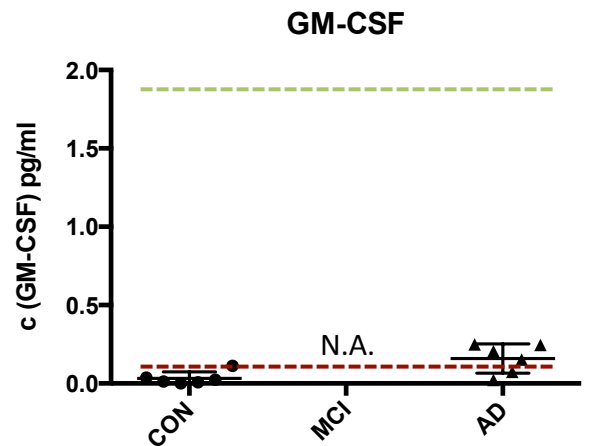

iv. Single analytes results

ICAM-1 (electrochemiluminescence multiplex; vascular injury panel)

Evaluation: **Passed**

Optimal dilution factor is 6x

- Spike-In-Curve has positive difference to standard curve
- Spike in Concentrations are linear in range of standard 3 – 8 at 10.000 pg/ml (2x Dilution)
- Sample concentrations > LLOQ (6.4 pg/ml)
- Sample concentrations in linear range
- All QC parameters passed
- No significant difference between test samples

A) Spike In Curve

ICAM-1 Spike in

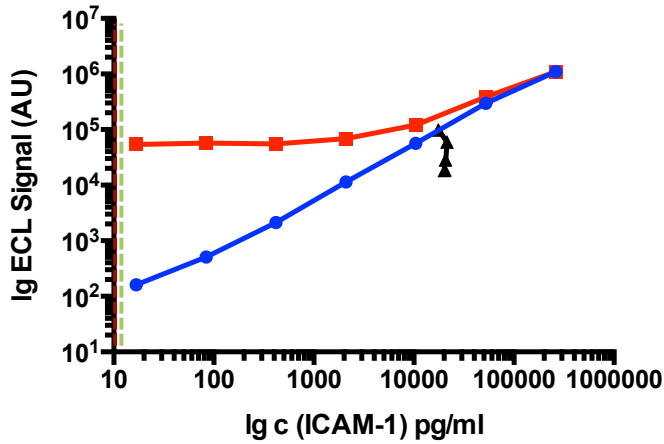

B) Recalculated concentrations curve

c (ICAM-1) pg/ml

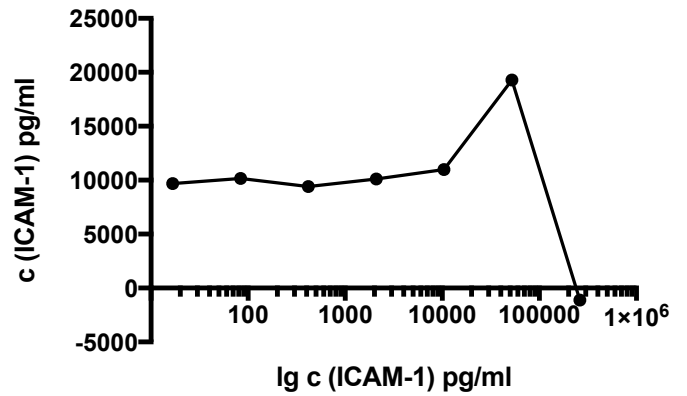

- Assay Standard
- CSF/Diluent Spike-In 1:1
- CSF Dilution Series

C) CSF dilution series

ICAM-1 Dilution Series

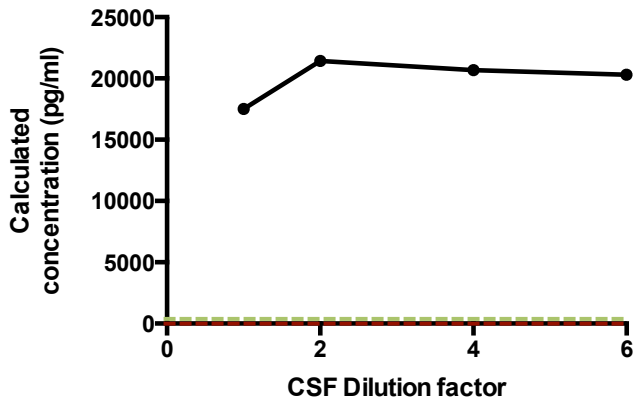

D) Test sample results

ICAM-1

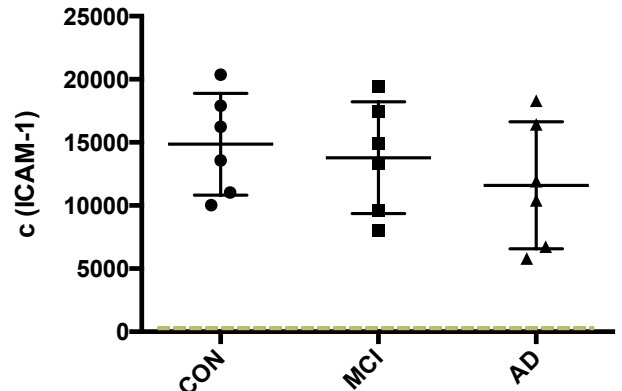



iv. Single analytes results

IFN- $\gamma$  (electrochemiluminescence multiplex; proinflammatory panel)

**Evaluation: Not passed**

Samples not detectable

- Spike-In-Curve overlaps with standard curve
- Spike in Concentrations are nonlinear
- Sample concentrations < LLOQ (7.47 pg/ml)
- No significant difference between test samples

A) Spike In Curve

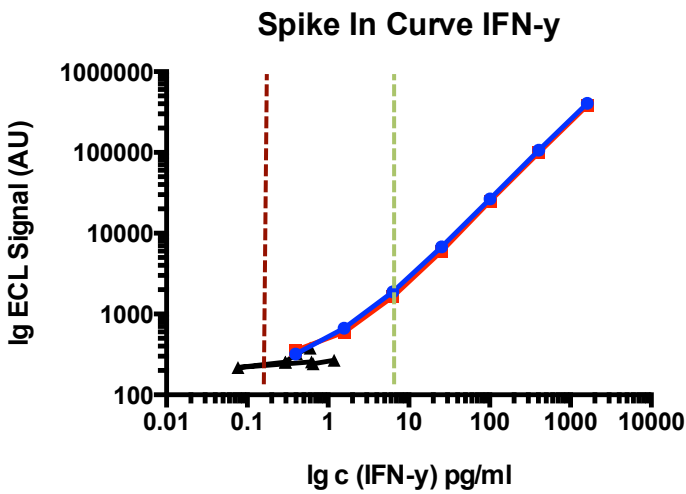

- Assay Standard
- CSF/Diluent Spike-In 1:1
- CSF Dilution Series

B) Recalculated concentrations curve

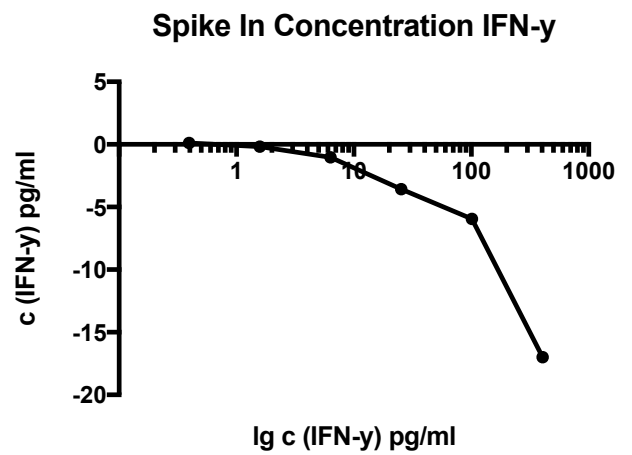

C) CSF dilution series

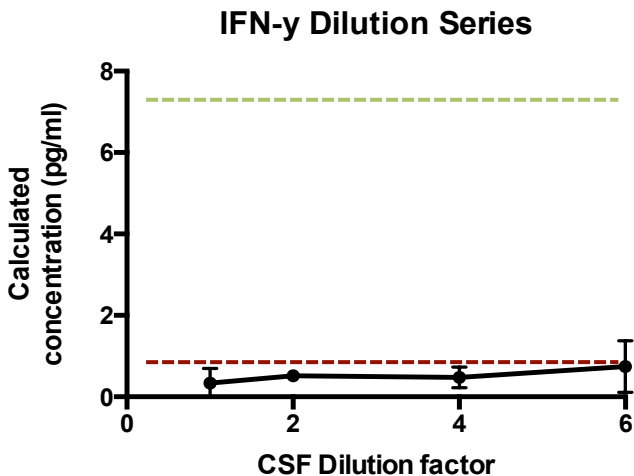

D) Test sample results

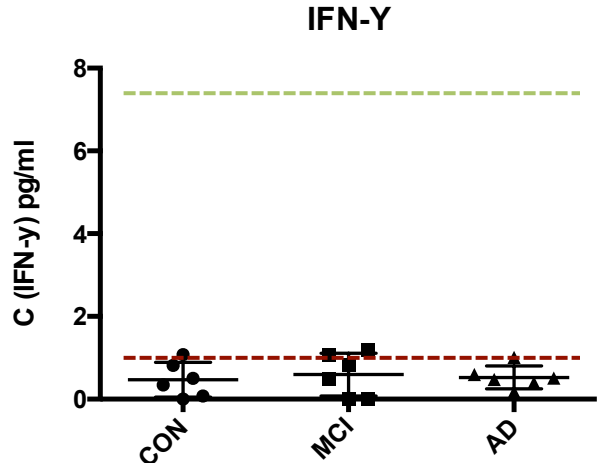

iv. Single analytes results

II-1 $\alpha$  (electrochemiluminescence multiplex; cytokine panel)

Evaluation: **Not passed**

Samples not detectable

- Spike-In-Curve overlaps with standard curve
- Spike in Concentrations are nonlinear
- Sample concentrations < LLOQ (2.85 pg/ml)
- No significant difference between test samples

A) Spike In Curve

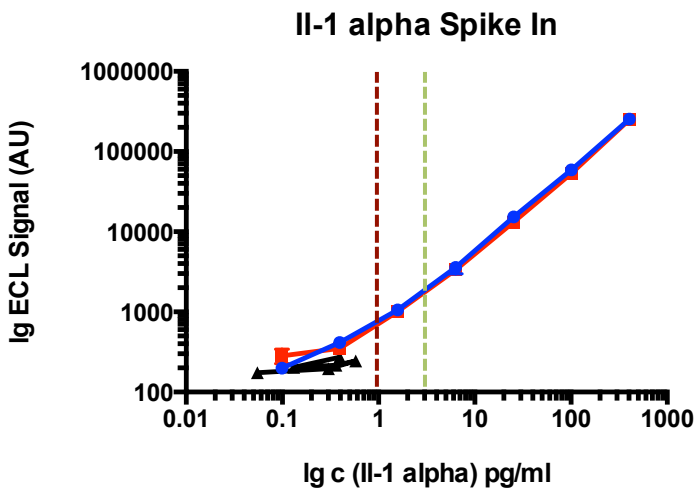

B) Recalculated concentrations curve

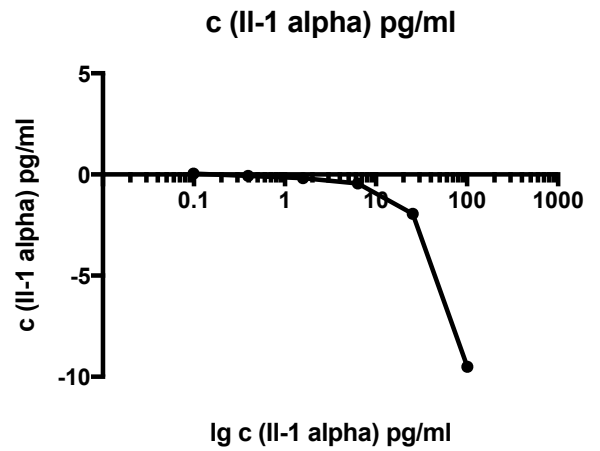

C) CSF dilution series

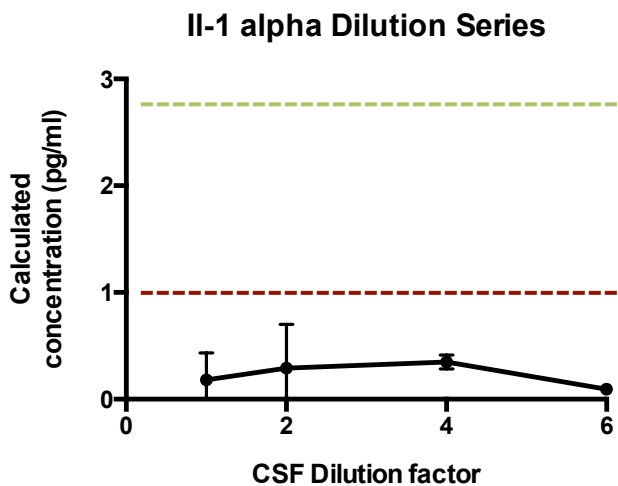

D) Test sample results

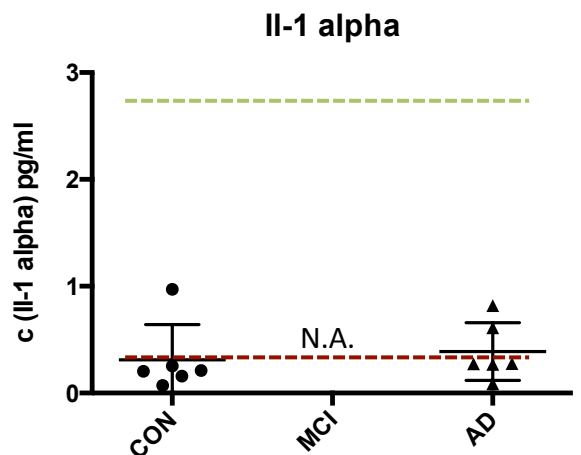

iv. Single analytes results

IL-1 $\beta$  (electrochemiluminescence multiplex; proinflammatory panel)

Evaluation: **Not passed**

Samples not detectable

- Spike-In-Curve overlaps with standard curve
- Spike in Concentrations are nonlinear
- Sample concentrations < LLOD (0.04 pg/ml)
- No significant difference between test samples

A) Spike In Curve

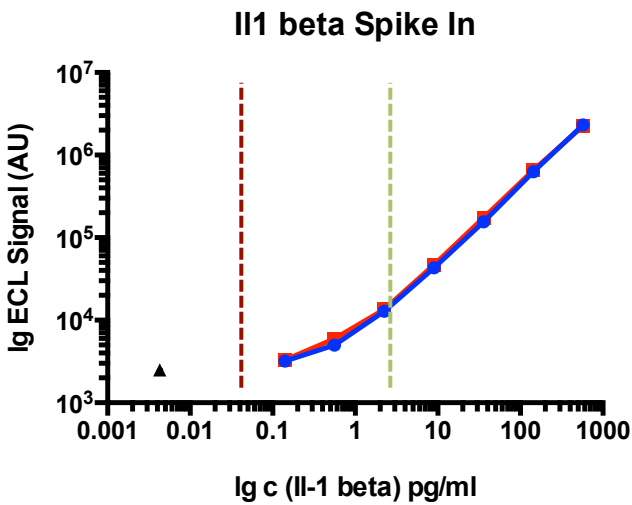

- Assay Standard
- CSF/Diluent Spike-In 1:1
- CSF Dilution Series

B) Recalculated concentrations curve

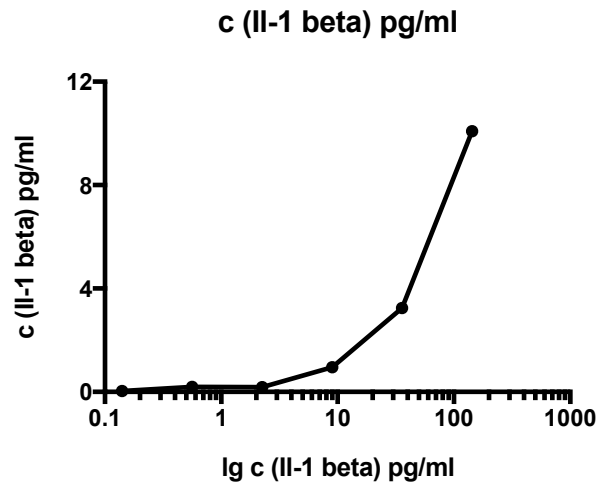

C) CSF dilution series

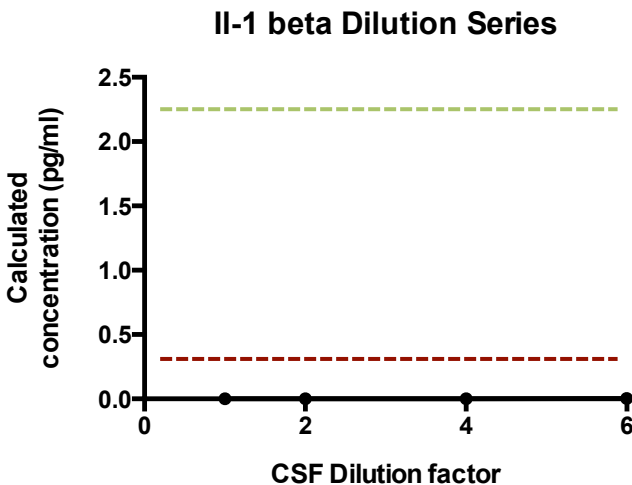

D) Test sample results

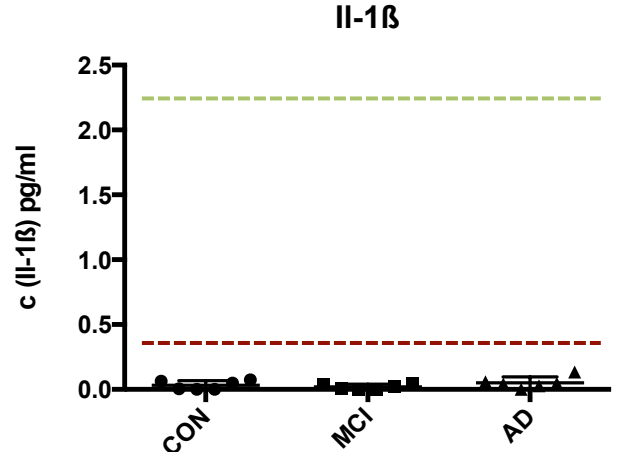

iv. Single analytes results

II-1RAcP (colorimetric singleplex)

Evaluation: **Passed**

Optimal dilution factor is 50x

- Spike-In-Curve has positive difference to standard curve
- Spike in Concentrations linear in range of standard 5 – 8 at 300 pg/ml (50x Dilution)
- Sample concentrations in linear range
- 2 test samples have a CV >20% while average CV is <10%
- No significant difference between test samples

A) Spike In Curve

Spike In Series

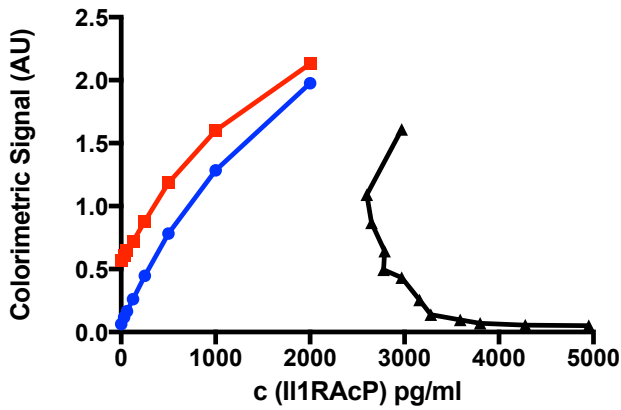

- Assay Standard
- CSF/Diluent Spike-In 1:50
- CSF Dilution Series

B) Recalculated concentrations curve

II-1RAcP (pg/ml)

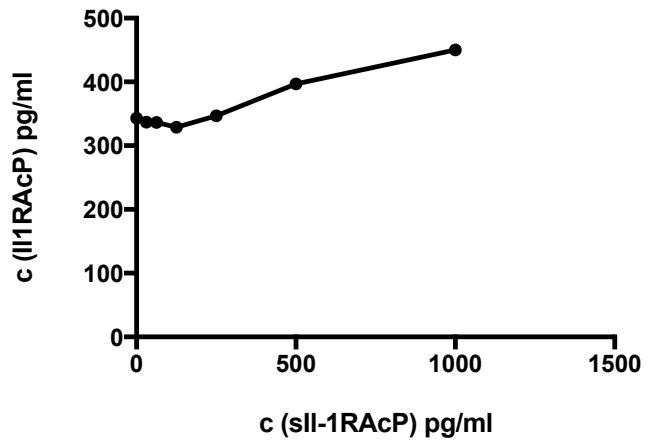

C) CSF dilution series

II1RAcP Dilution Series

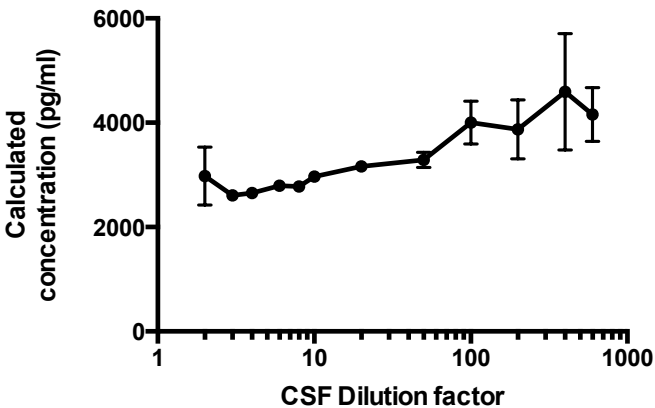

D) Test sample results

II1RAcP Samples

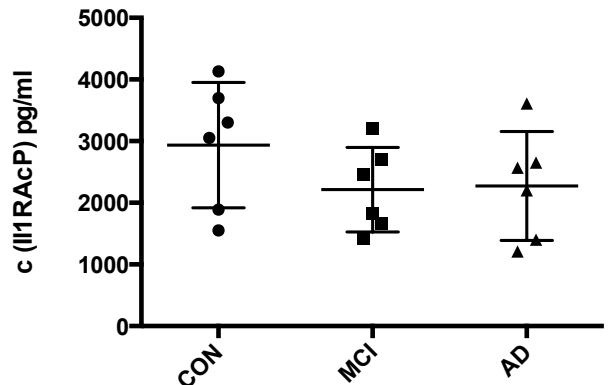

iv. Single analytes results

IL-2 (electrochemiluminescence multiplex; proinflammatory panel)

Evaluation: **Not passed**

Samples not detectable

- Spike-In-Curve has small but positive difference to standard curve
- Spike-in concentrations are nonlinear
- Sample concentrations < LLOQ (0.89 pg/ml)
- No significant difference between test samples

A) Spike In Curve

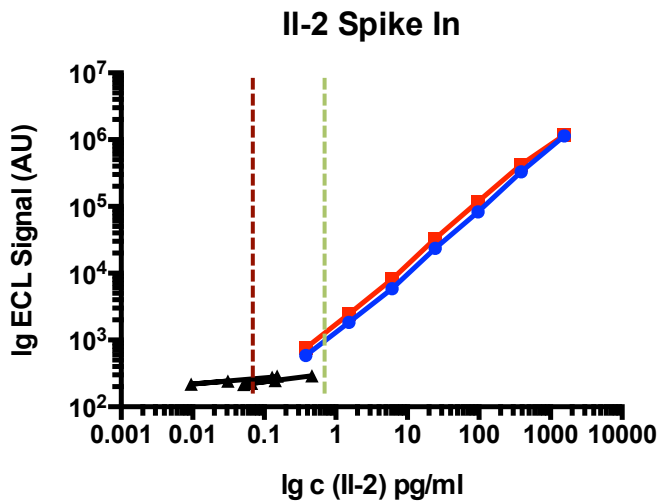

B) Recalculated concentrations curve

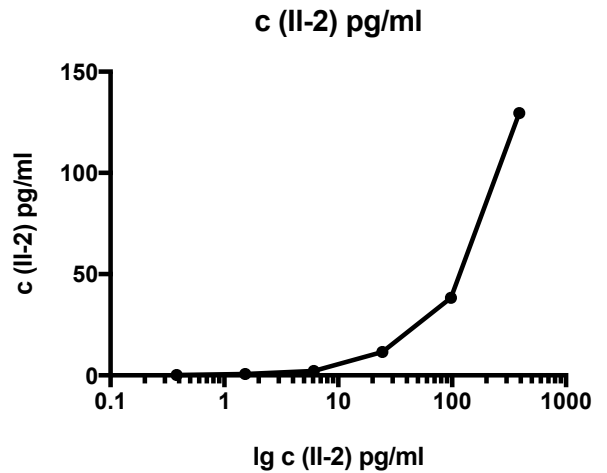

C) CSF dilution series

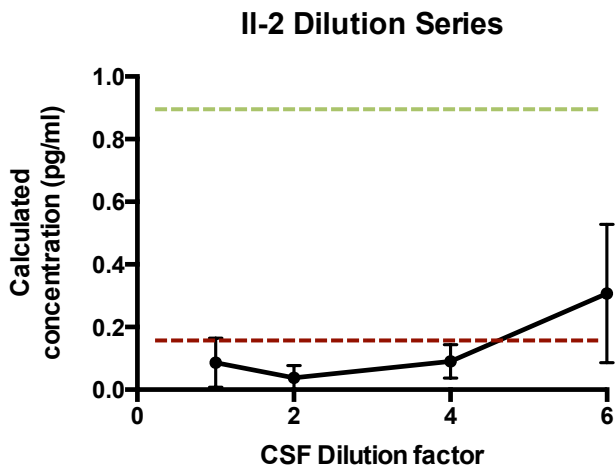

D) Test sample results

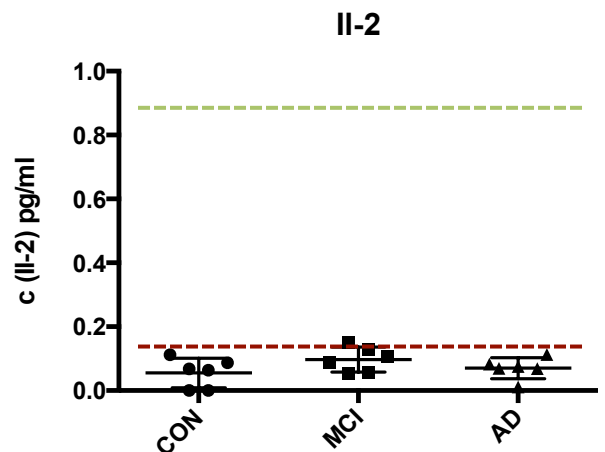

iv. Single analytes results

II-4 (electrochemiluminescence multiplex; proinflammatory panel)

Evaluation: **Not passed**

Samples not detectable

- Spike-In-Curve overlaps with standard curve
- Spike in Concentrations are nonlinear
- Sample concentrations < LLOD (0.02 pg/ml)
- No significant difference between test samples

A) Spike In Curve

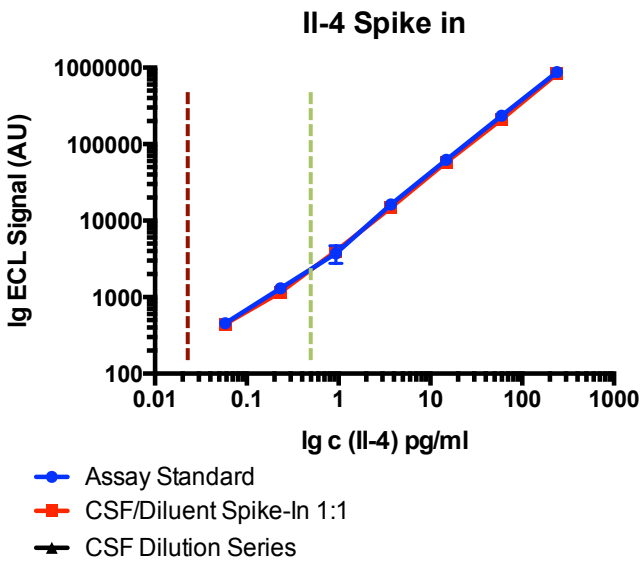

B) Recalculated concentrations curve

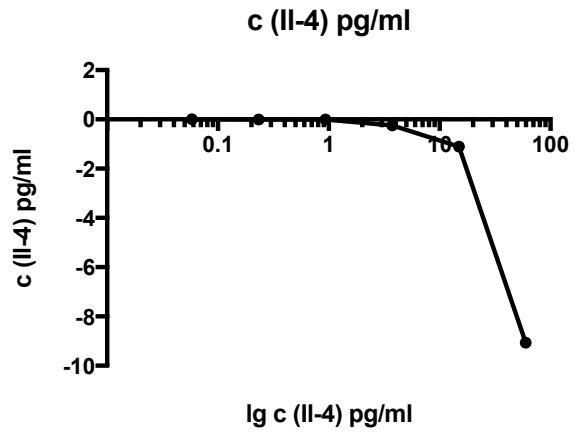

C) CSF dilution series

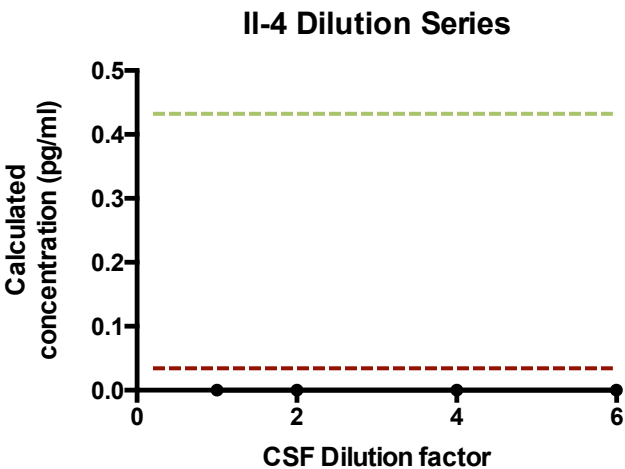

D) Test sample results

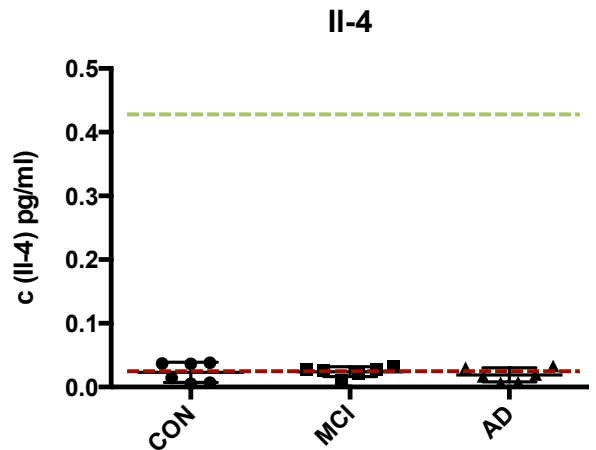

iv. Single analytes results

IL-5 (electrochemiluminescence multiplex; cytokine panel)

Evaluation: **Borderline**

Samples not detectable but might be drawn in detection range by spike-in of protein

- Spike-In-Curve overlaps with standard curve
- Spike in Concentrations are linear in range of standard 5 – 8 at 0.5 pg/ml (2x Dilution)
- Sample concentrations < LLOQ (6.28 pg/ml)
- No significant difference between test samples

A) Spike In Curve

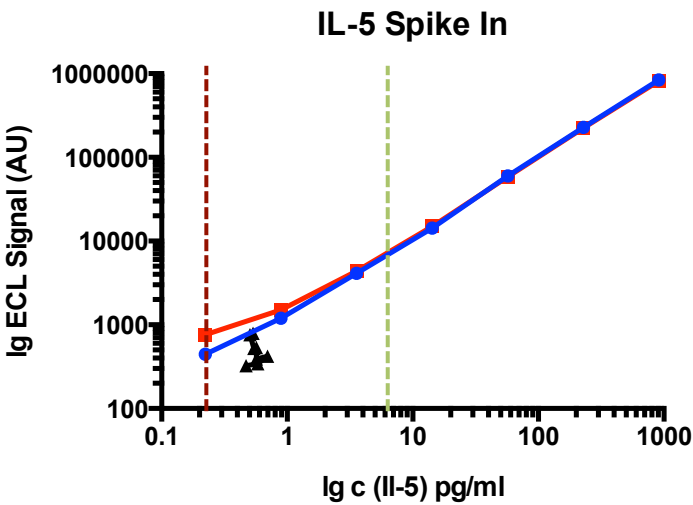

- Assay Standard
- CSF/Diluent Spike-In 1:1
- CSF Dilution Series

B) Recalculated concentrations curve

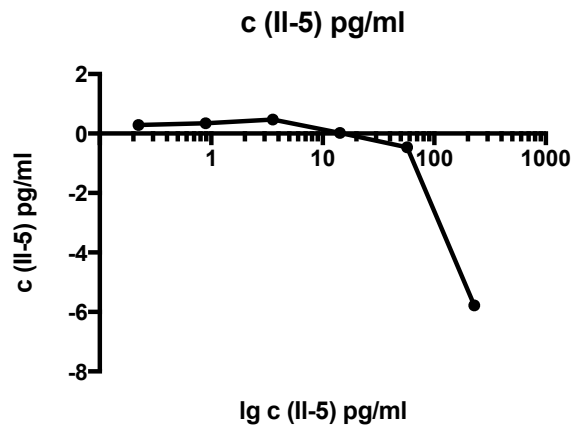

C) CSF dilution series

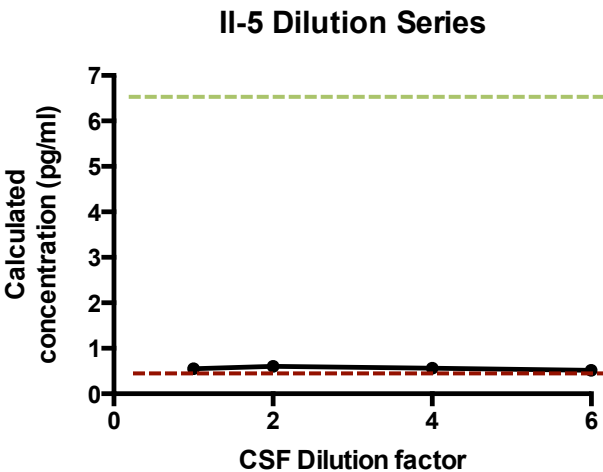

D) Test sample results

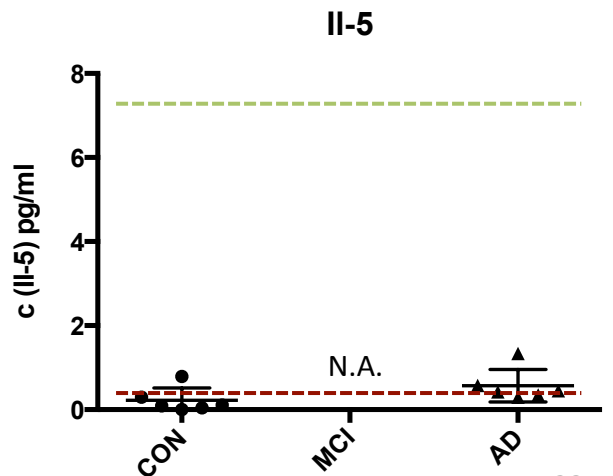

iv. Single analytes results

II-6 (electrochemiluminescence multiplex; proinflammatory panel)

Evaluation: **Borderline**

Samples not detectable but might be drawn in detection range by spike-in of protein

- Spike-In-Curve has small but positive difference to standard curve
- Spike in Concentrations are linear in range of standard 4 – 8 at 10.0 pg/ml (2x Dilution)
- Sample concentrations < LLOQ (1.58 pg/ml)
- No significant difference between test samples

A) Spike In Curve

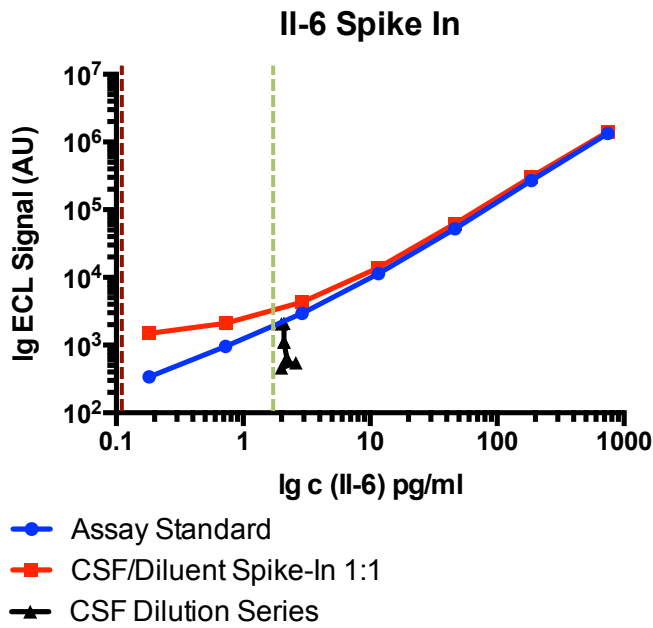

B) Recalculated concentrations curve

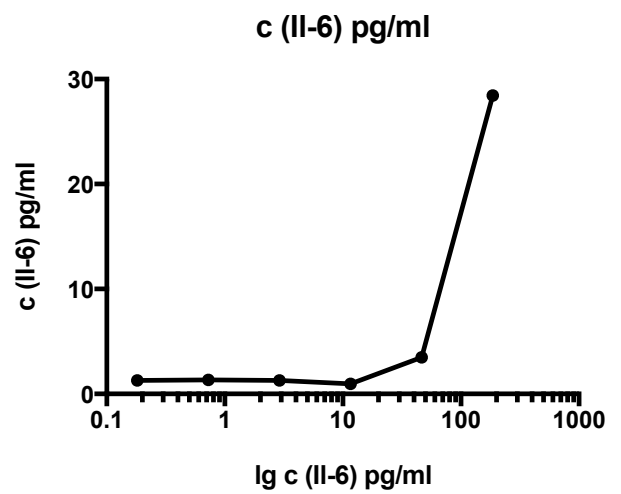

C) CSF dilution series

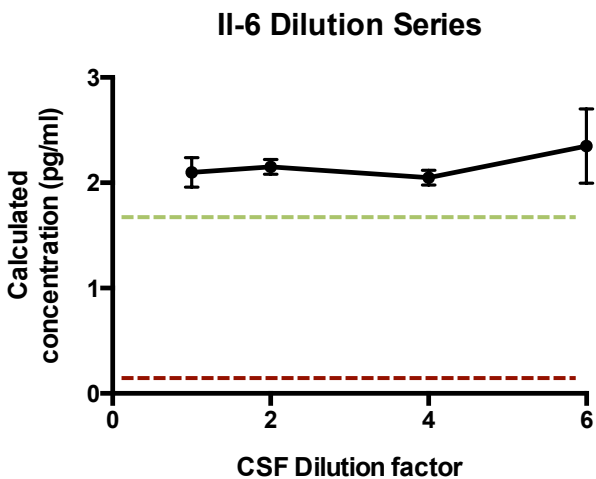

D) Test sample results

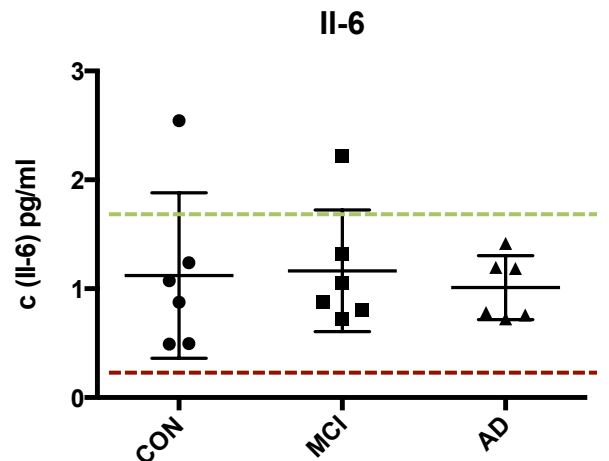



iv. Single analytes results

IL-7 (electrochemiluminescence multiplex; cytokine panel)

**Evaluation: Borderline**

Samples not detectable but might be drawn in detection range by spike-in of protein

- Spike-In-Curve overlaps with standard curve
- Spike in Concentrations are linear in range of standard 5 – 8 at 0.5 pg/ml (2x Dilution)
- Sample concentrations < LLOQ (1.37 pg/ml)
- Sample concentrations below assay range
- Conflicting QC:
  - Majority of samples < LLOQ
  - Majority of samples still has low CV (75% of samples has CV < 20%)
  - Tendency is not significant in nonparametric test
- No significant difference between test samples

A) Spike In Curve

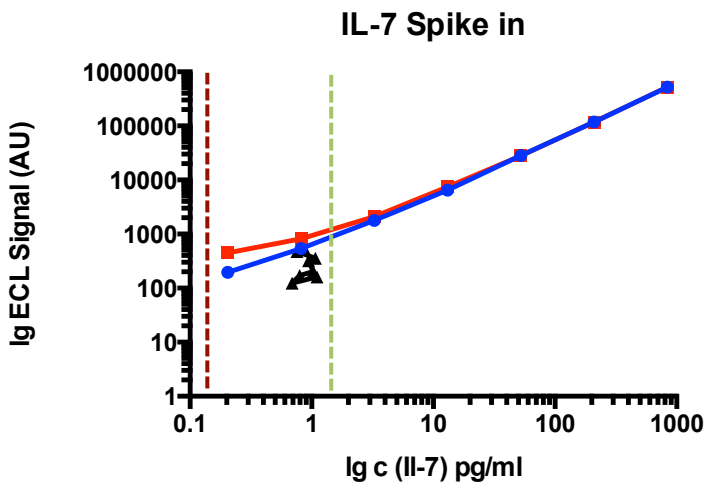

- Assay Standard
- CSF/Diluent Spike-In 1:1
- CSF Dilution Series

B) Recalculated concentrations curve

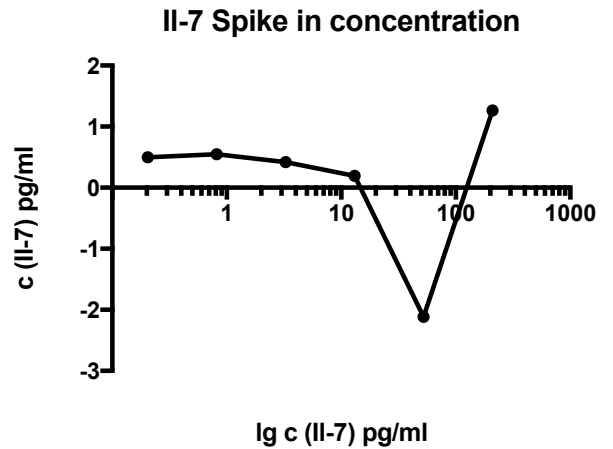

C) CSF dilution series

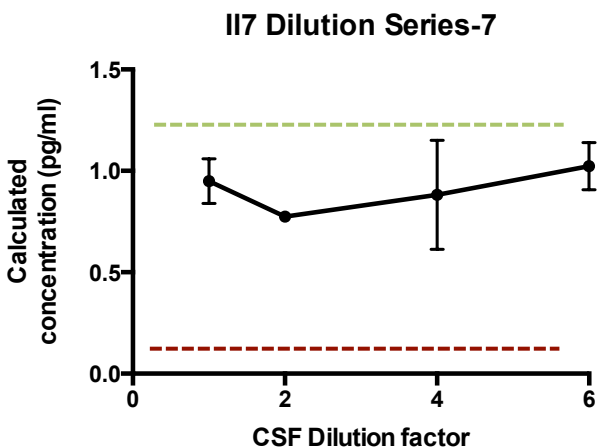

D) Test sample results

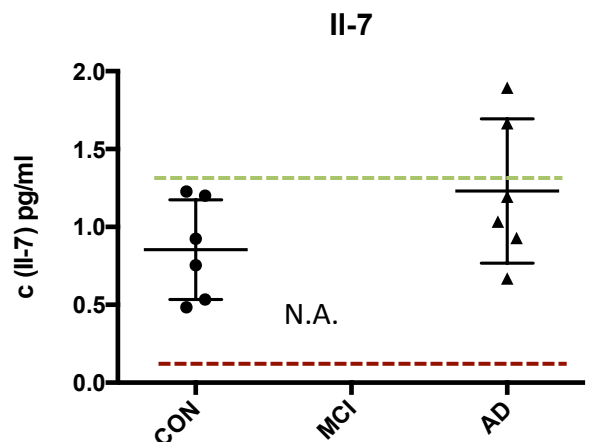

iv. Single analytes results

II-8 (electrochemiluminescence multiplex; chemokine panel)

**Note:** This assay was also tested as part of the proinflammatory panel (p. 27) were it passed due to differences in concentration range

**Evaluation:** **Not passed**

Samples not detectable (use proinflammatory panel version instead)

- Spike-In-Curve overlaps with standard curve
- Spike in Concentrations are nonlinear
- Sample concentrations < LLOQ (713.0 pg/ml)
- No significant difference between test samples

A) Spike In Curve

II-8 Spike in

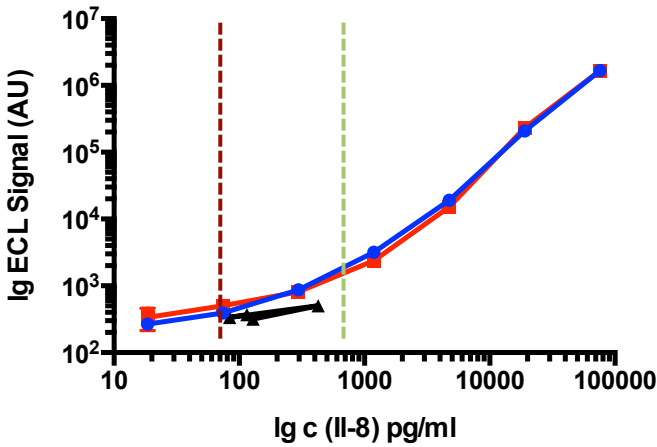

- Assay Standard
- CSF/Diluent Spike-In 1:1
- CSF Dilution Series

B) Recalculated concentrations curve

c (II-8) pg/ml

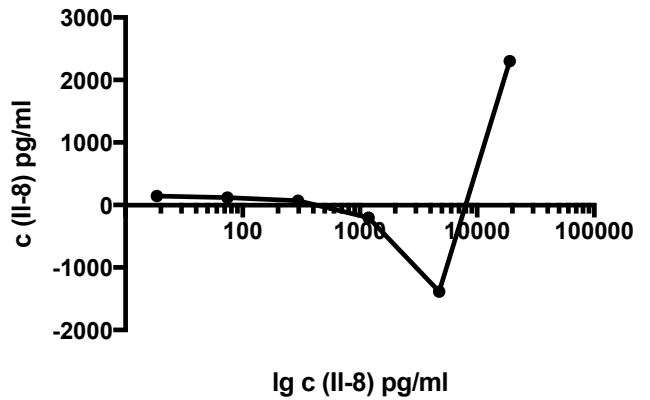

C) CSF dilution series

II-8 Dilution Series

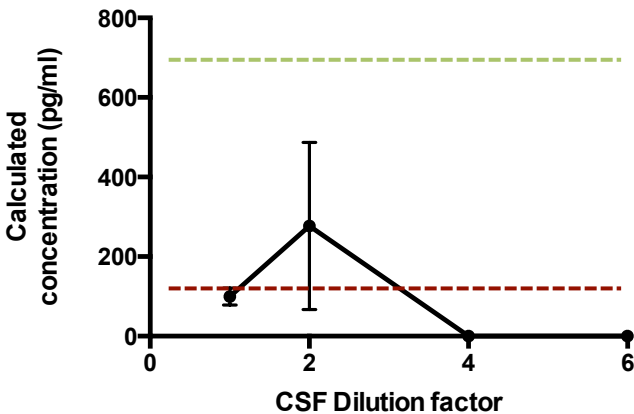

D) Test sample results

II-8

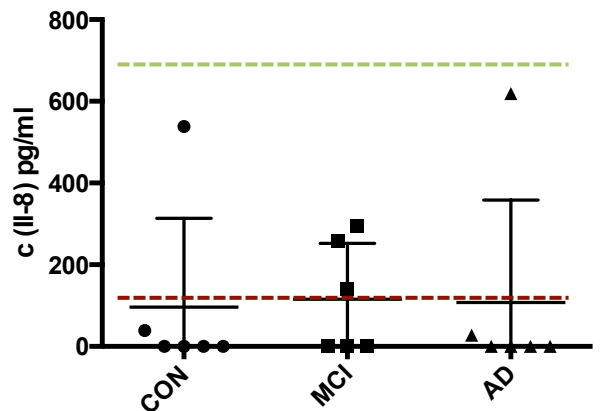

iv. Single analytes results

**IL-8 (electrochemiluminescence multiplex; proinflammatory panel)**

**Note:** This assay was also tested as part of the chemokine panel (p. 26) where it failed due to differences in concentration range

**Evaluation:** Passed

Optimal dilution factor is 4x

- Spike-In-Curve has positive difference to standard curve
- Spike in Concentrations are linear in range of standard 2 – 8 at 30 pg/ml (2x Dilution)
- Sample concentrations > LLOQ (1.13 pg/ml)
- Sample concentrations in linear range
- No significant difference between test samples

**A) Spike In Curve**

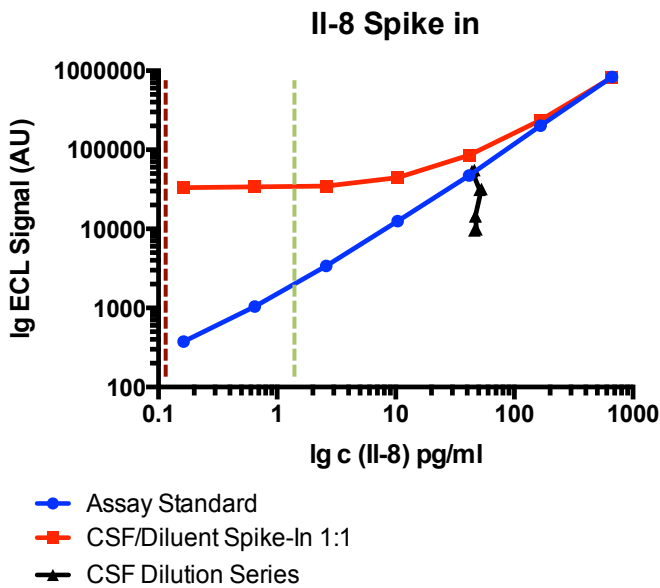

**B) Recalculated concentrations curve**

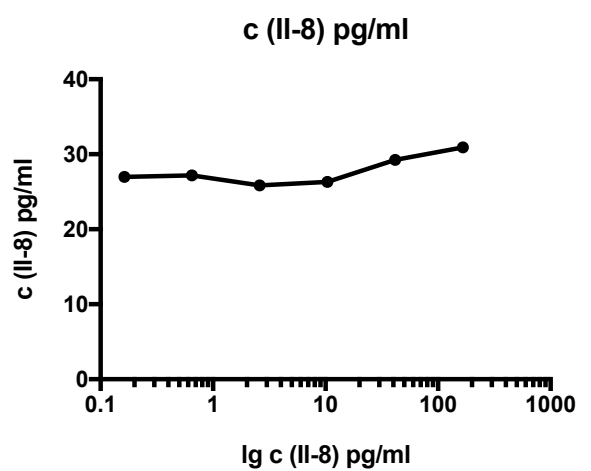

**C) CSF dilution series**

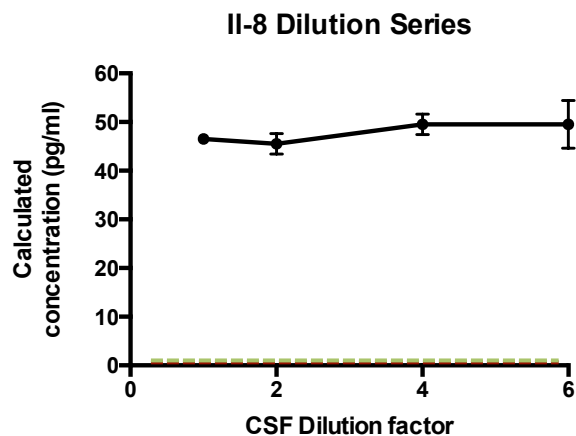

**D) Test sample results**

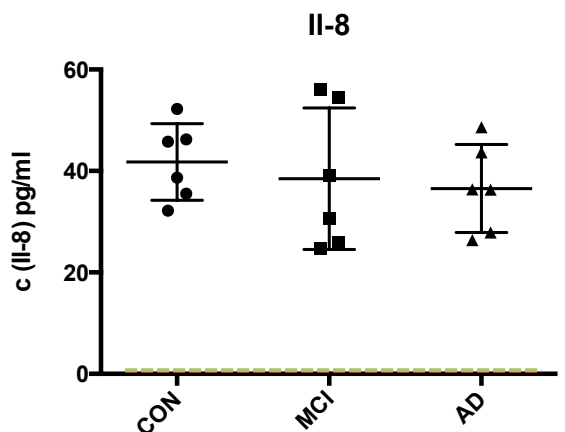

iv. Single analytes results

IL-10 (electrochemiluminescence multiplex; proinflammatory panel)

Evaluation: **Not passed**

Samples not detectable

- Spike-In-Curve overlaps with standard curve
- Spike in Concentrations close to 0 in range of standard 5 – 8 (2x Dilution)
- Sample concentrations < LLOQ (0.68 pg/ml)
- No significant difference between test samples

A) Spike In Curve

IL-10 Spike in

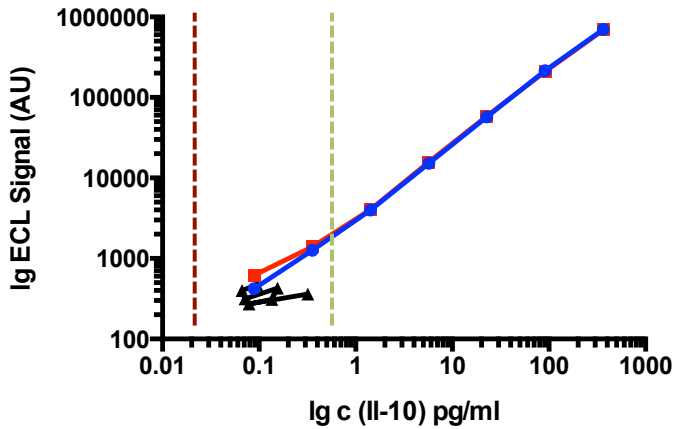

- Assay Standard
- CSF/Diluent Spike-In 1:1
- CSF Dilution Series

B) Recalculated concentrations curve

c (IL-10) pg/ml

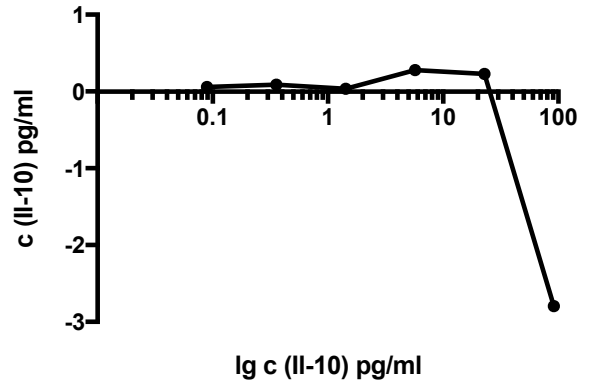

C) CSF dilution series

IL-10 Dilution Series

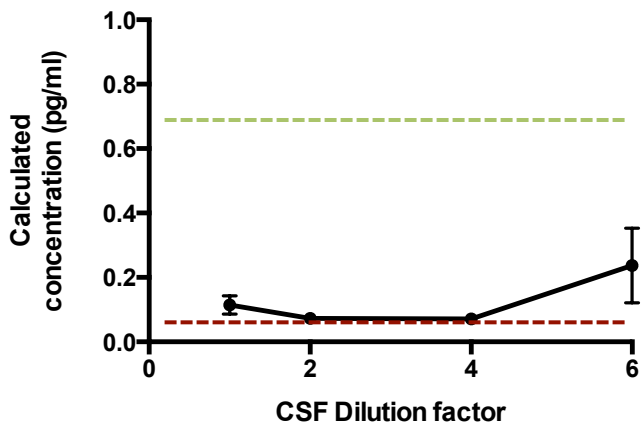

D) Test sample results

IL-10

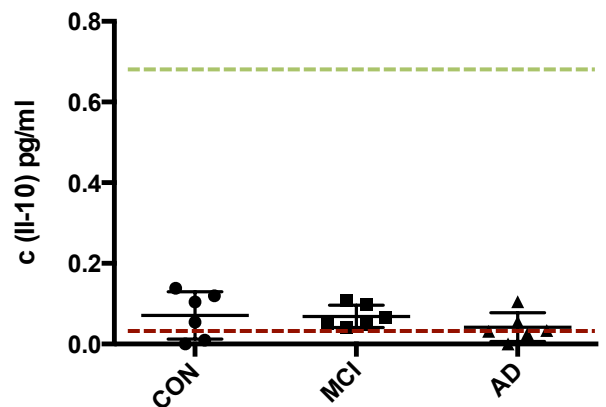

iv. Single analytes results

**IL-12 p40 (electrochemiluminescence multiplex; cytokine panel)**

**Evaluation: Borderline**

Samples not detectable but might be drawn in detection range by spike-in of protein

- Spike-In-Curve overlaps with standard curve
- Spike in Concentrations linear in range of standard 4 – 8 at 2.0 pg/ml (2x Dilution)
- Sample concentrations < LLOQ (5.68 pg/ml)
- Sample concentrations below assay range
- Conflicting QC:
  - Majority of samples < LLOQ
  - All tested samples still have low CV (100% of samples has CV < 20%)
  - No tendency between tested samples
- No significant difference between test samples

**A) Spike In Curve**

**IL-12 p40 Spike in**

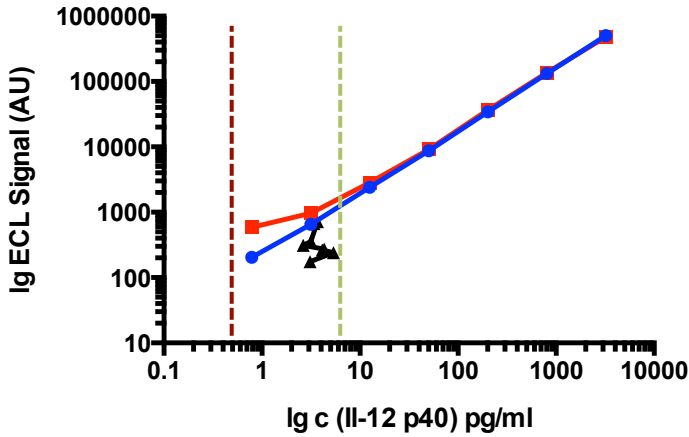

- Assay Standard
- CSF/Diluent Spike-In 1:1
- CSF Dilution Series

**B) Recalculated concentrations curve**

**IL12p40 Spike in concentration**

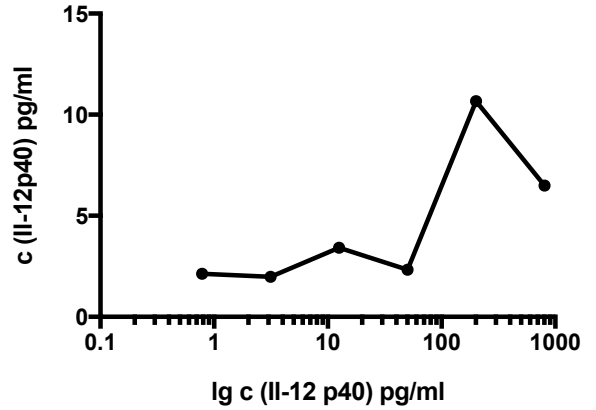

**C) CSF dilution series**

**IL-12 p40 Dilution Series**

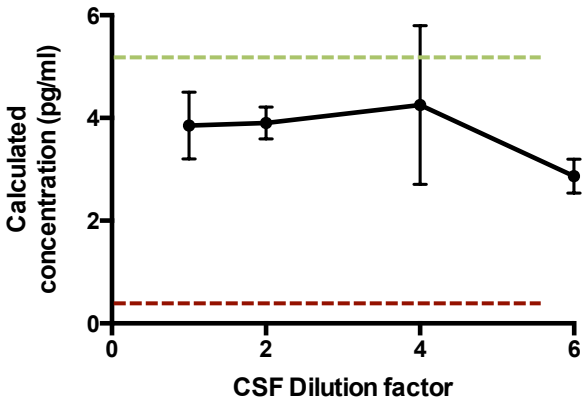

**D) Test sample results**

**IL-12p40**

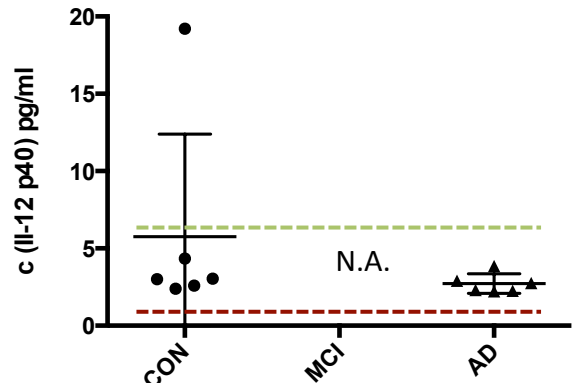

iv. Single analytes results

**Il-12 p70 (electrochemiluminescence multiplex; proinflammatory panel)**

**Evaluation: Not passed**

Samples not detectable

- Spike-In-Curve overlaps with standard curve
- Spike in Concentrations are nonlinear
- Sample concentrations < LLOQ (1.22 pg/ml)
- No significant difference between test samples

**A) Spike In Curve**

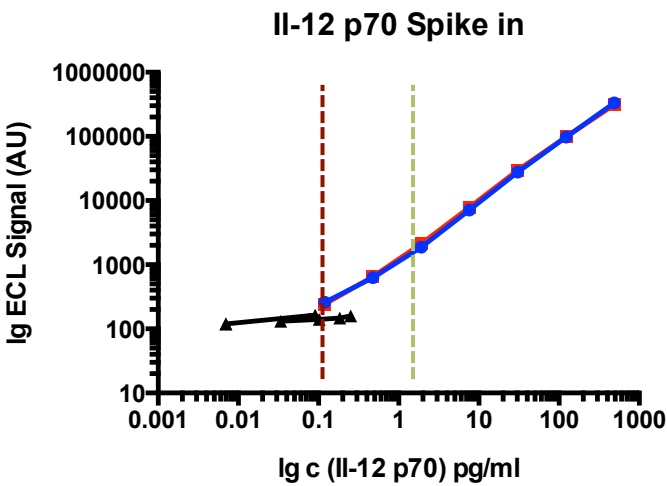

- Assay Standard
- CSF/Diluent Spike-In 1:1
- CSF Dilution Series

**B) Recalculated concentrations curve**

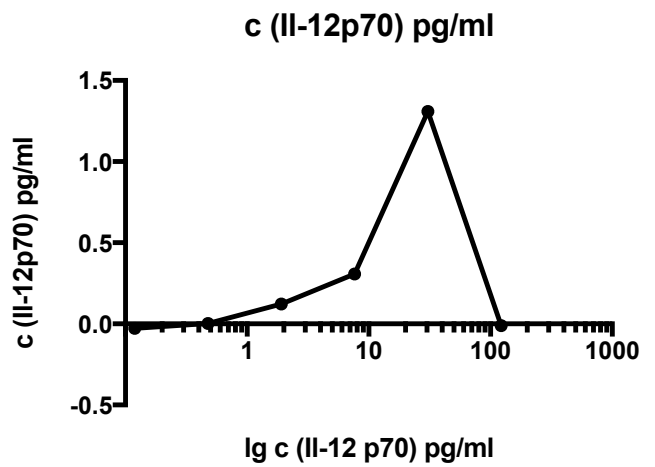

**C) CSF dilution series**

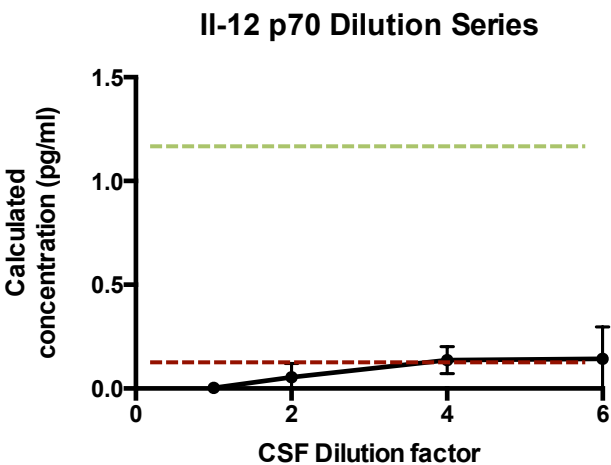

**D) Test sample results**

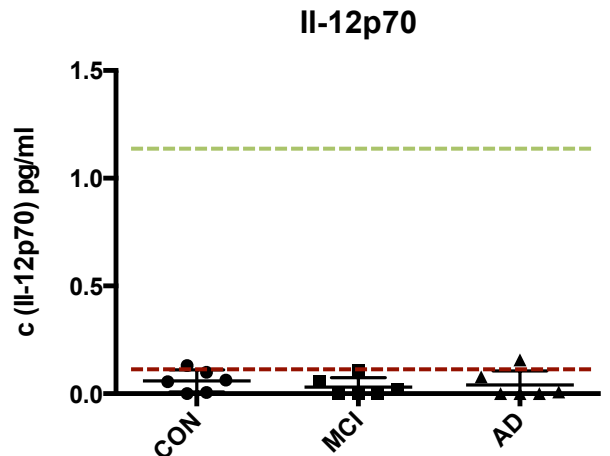

iv. Single analytes results

Il-13 (electrochemiluminescence multiplex; proinflammatory panel)

Evaluation: **Not passed**

Samples not detectable

- Spike-In-Curve overlaps with standard curve
- Spike in Concentrations are nonlinear
- Sample concentrations < LLOQ (4.21 pg/ml)
- No significant difference between test samples

A) Spike In Curve

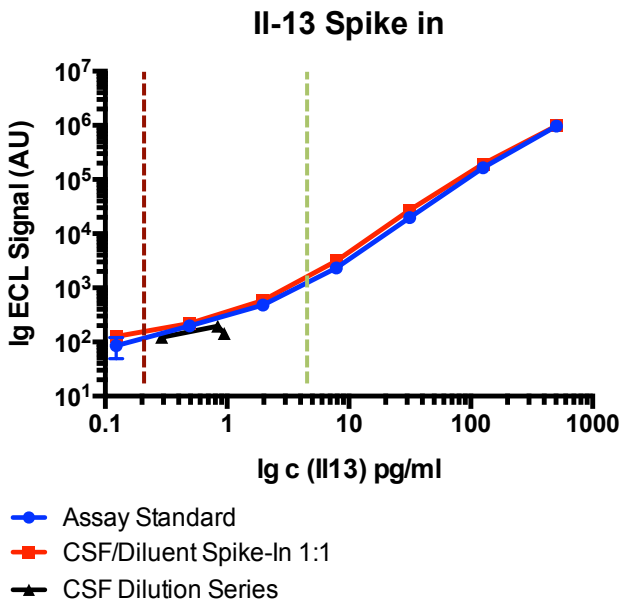

B) Recalculated concentrations curve

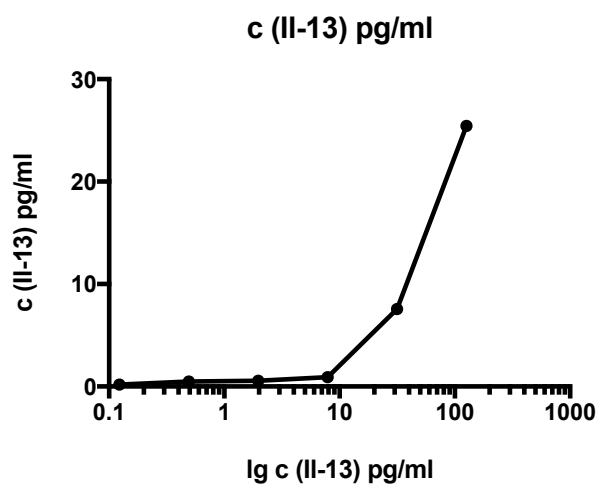

C) CSF dilution series

Il-13 Dilution Series

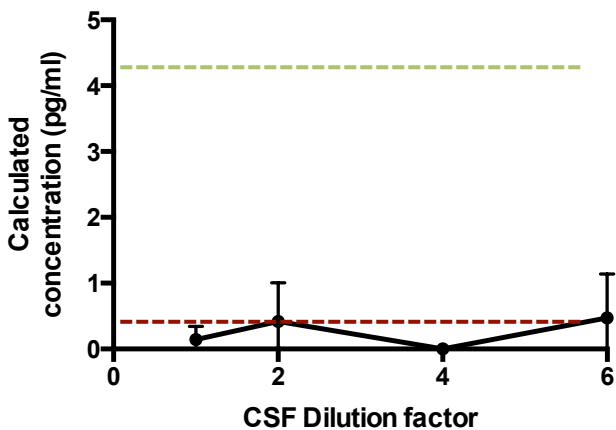

D) Test sample results

Il-13

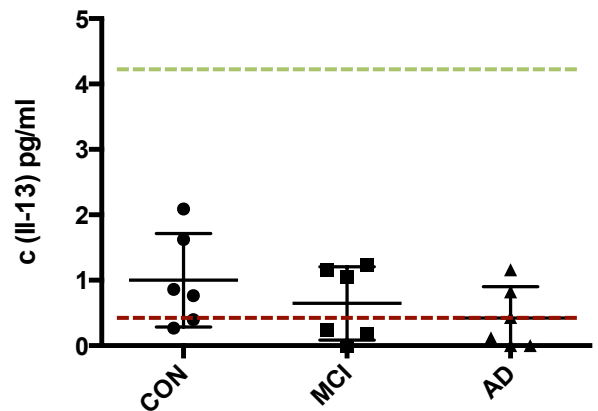

iv. Single analytes results

**IL-15 (electrochemiluminescence multiplex; cytokine panel)**

**Evaluation:** Borderline

Optimal dilution factor is 2x; spike-in setup might improve detectability

- Spike-In-Curve has positive difference to standard curve
- Spike in Concentrations are linear in range of standard 5 – 8 at 2.0 pg/ml (2x Dilution)
- Sample concentrations > LLOQ (1.4 pg/ml)
- Sample concentrations in linear range
- Conflicting QC:
  - One of 12 tested samples below LLOQ
  - One of 12 tested Samples has slightly elevated CV (23%)
- No significant difference between samples

**A) Spike In Curve**

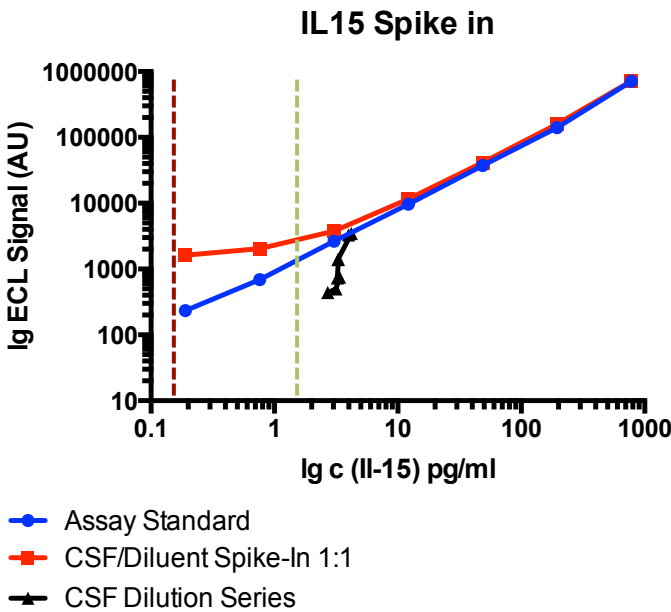

**B) Recalculated concentrations curve**

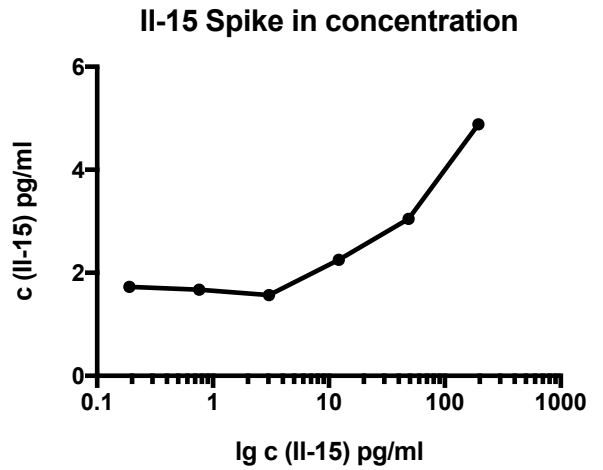

**C) CSF dilution series**

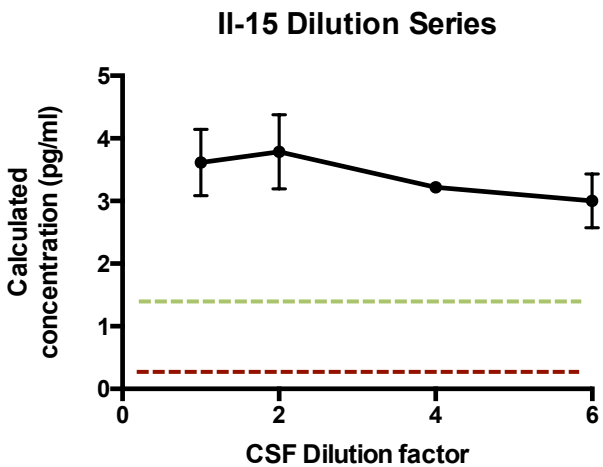

**D) Test sample results**

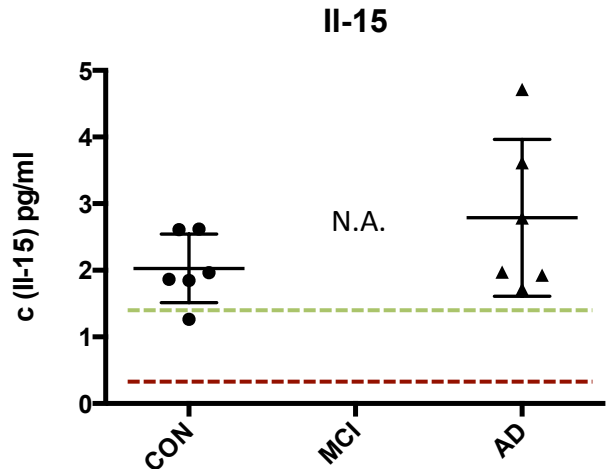



iv. Single analytes results

IL-16 (electrochemiluminescence multiplex; cytokine panel)

Evaluation: **Borderline**

Samples not detectable but might be drawn in detection range by spike-in of protein

- Spike-In-Curve overlaps with standard curve
- Spike in Concentrations are linear in range of standard 5 – 8 at 10.0 pg/ml (2x Dilution)
- Sample concentrations < LLOQ (19.1 pg/ml)
- No significant difference between test samples

A) Spike In Curve

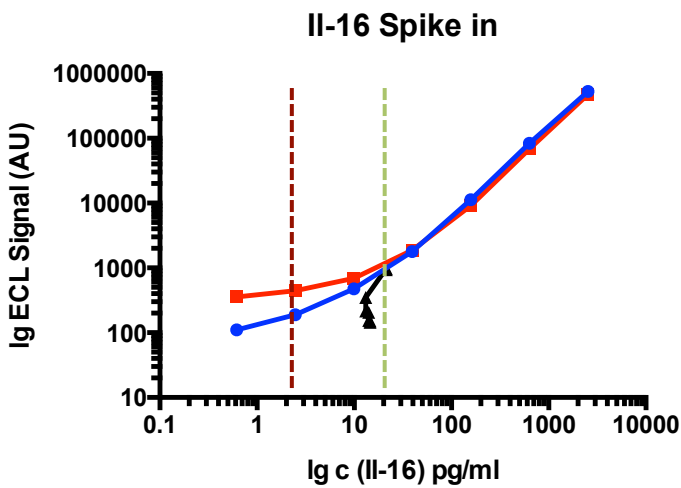

- Assay Standard
- CSF/Diluent Spike-In 1:1
- CSF Dilution Series

B) Recalculated concentrations curve

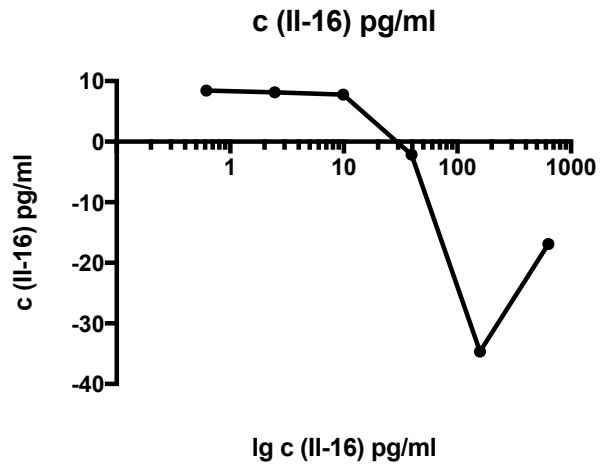

C) CSF dilution series

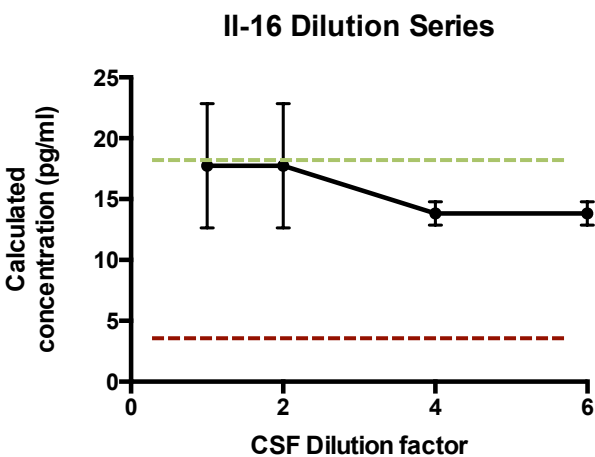

D) Test sample results

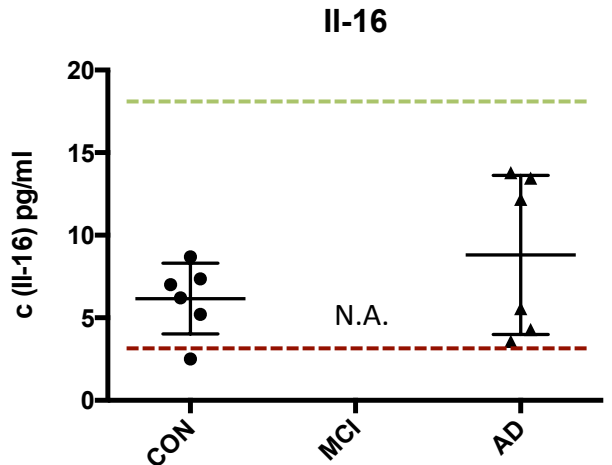

iv. Single analytes results

IL-17A (electrochemiluminescence multiplex; cytokine panel)

Evaluation: **Not passed**

Samples not detectable

- Spike-In-Curve overlaps with standard curve
- Spike in Concentrations are nonlinear
- Sample concentrations < LLOD (0.74 pg/ml)
- No significant difference between test samples

A) Spike In Curve

IL-17A Spike in

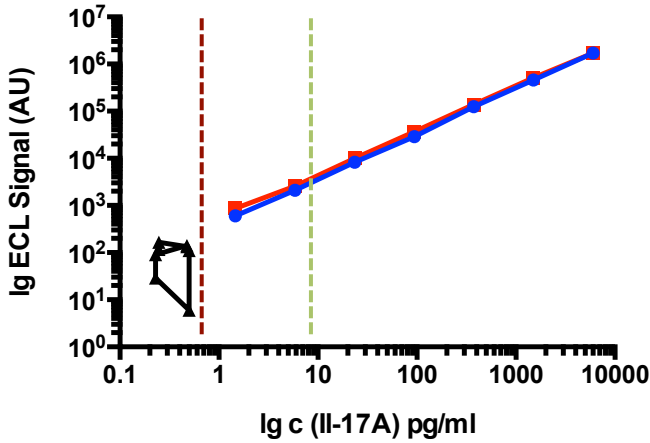

- Assay Standard
- CSF/Diluent Spike-In 1:1
- CSF Dilution Series

B) Recalculated concentrations curve

c (IL-17A) pg/ml

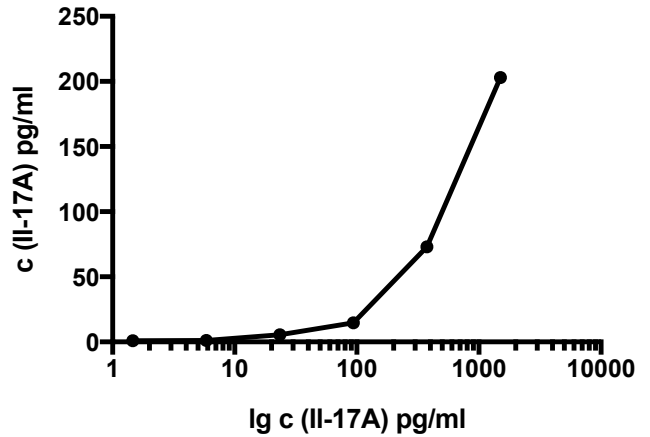

C) CSF dilution series

IL-17A Dilution Series

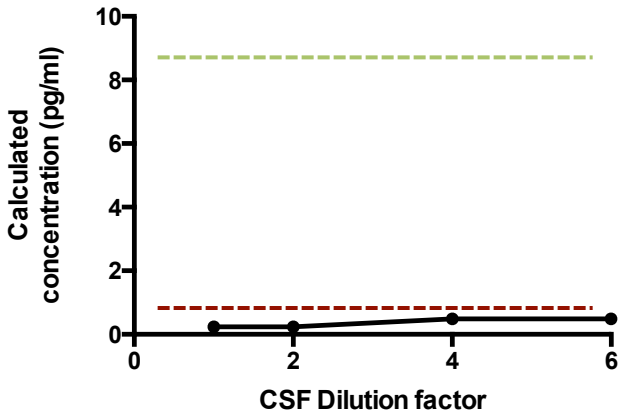

D) Test sample results

IL-17A

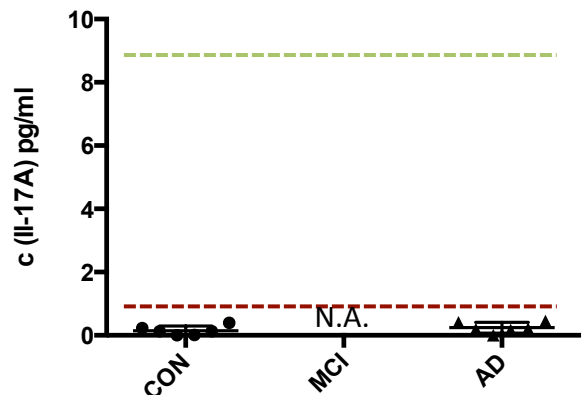

iv. Single analytes results

IP-10 (electrochemiluminescence multiplex; chemokine panel)

Evaluation: **Passed**

Optimal dilution factor is >6x

- Spike-In-Curve has positive difference to standard curve
- Spike in Concentrations are linear in range of standard 4 – 8 at 400 pg/ml (2x Dilution)
- Sample concentrations > LLOD (1.37 pg/ml)
- Sample concentrations in linear range if diluted
- No significant difference between test samples

A) Spike In Curve

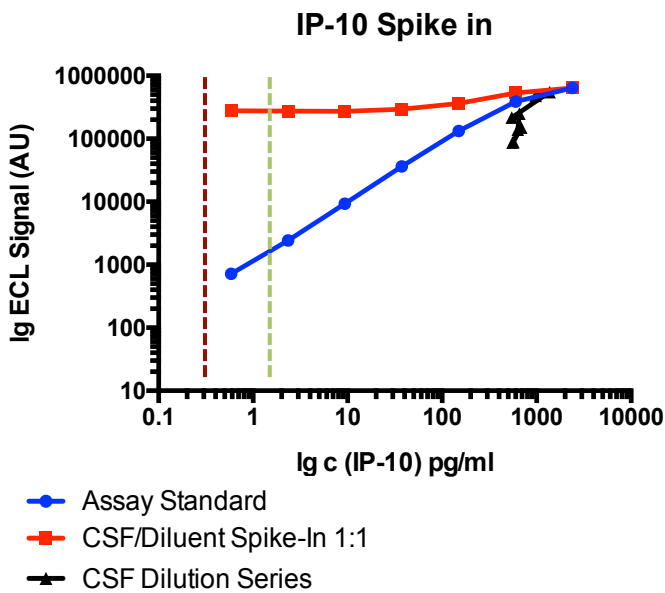

B) Recalculated concentrations curve

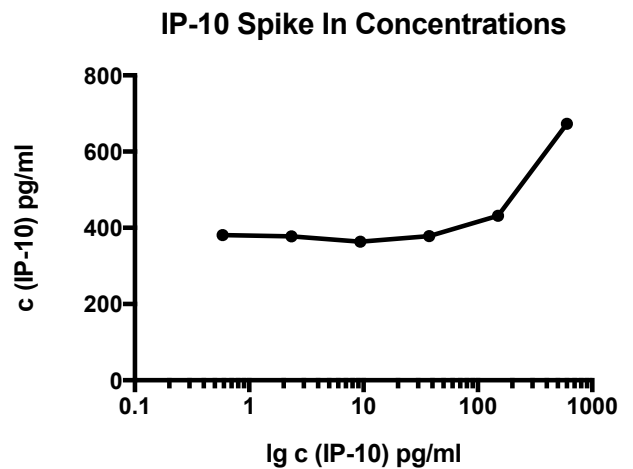

C) CSF dilution series

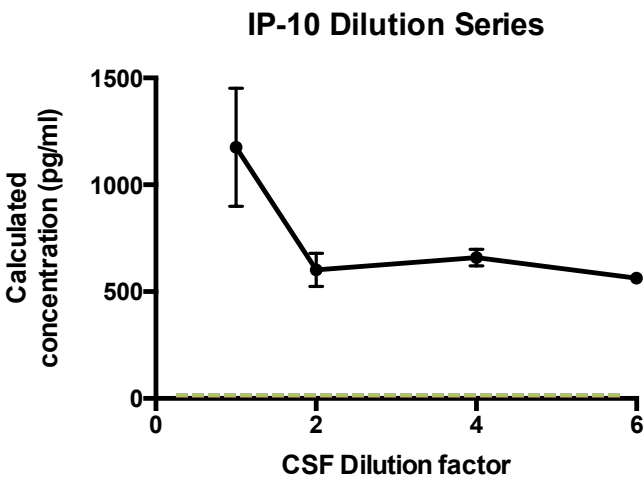

D) Test sample results

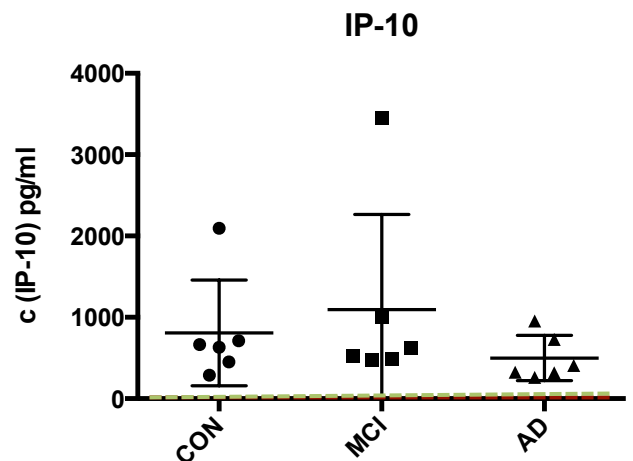

iv. Single analytes results

MCP-1 (electrochemiluminescence multiplex; chemokine panel)

Evaluation: **Passed**

Optimal dilution factor is >6x

- Spike-In-Curve has positive difference to standard curve
- Spike in Concentrations are linear in range of standard 3 – 8 at 250 pg/ml (2x Dilution)
- Sample concentrations > LLOD (1.09 pg/ml)
- Sample concentrations in linear range if diluted
- No significant difference between test samples

A) Spike In Curve

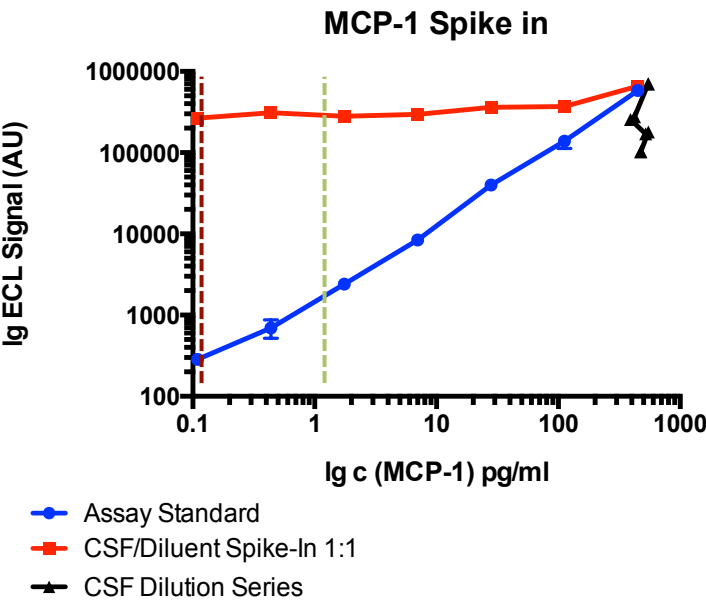

B) Recalculated concentrations curve

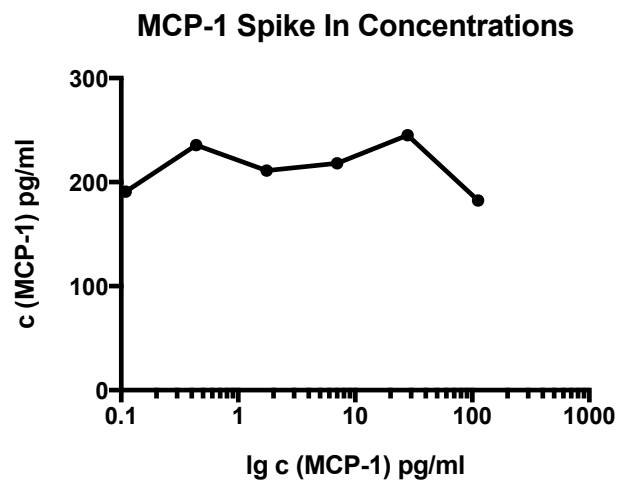

C) CSF dilution series

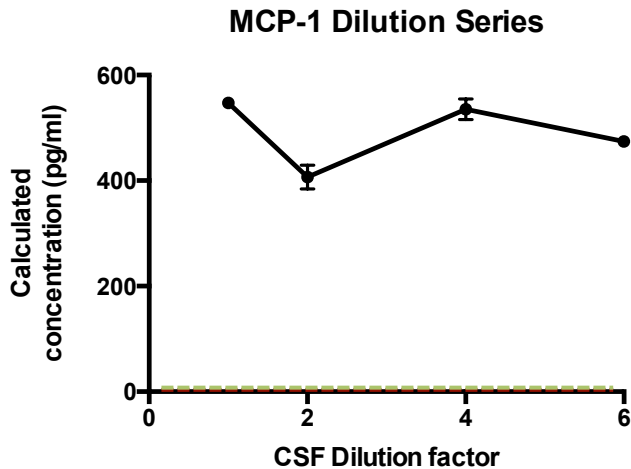

D) Test sample results

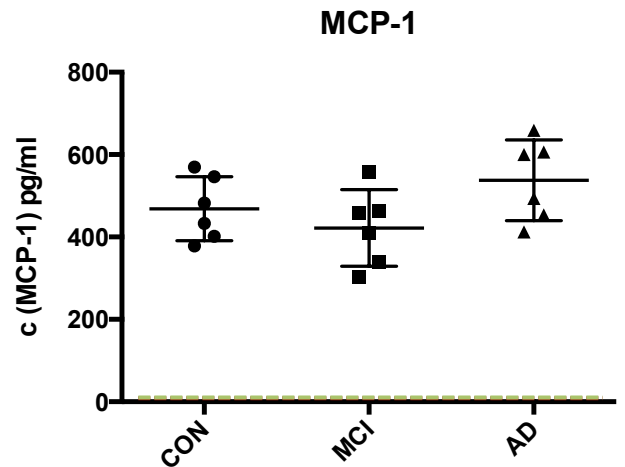

iv. Single analytes results

MCP-4 (electrochemiluminescence multiplex; chemokine panel)

Evaluation: **Not passed**

Samples not detectable

- Spike-In-Curve overlaps with standard curve
- Spike in Concentrations are nonlinear
- Sample concentrations < LLOQ (5.13 pg/ml)
- No significant difference between test samples

A) Spike In Curve

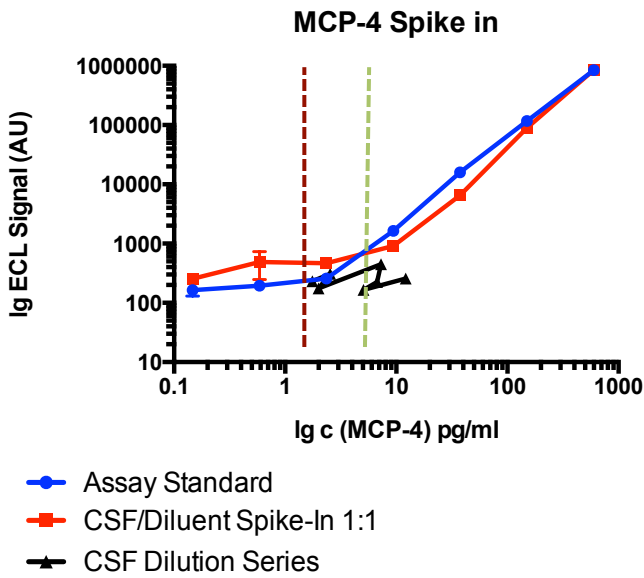

B) Recalculated concentrations curve

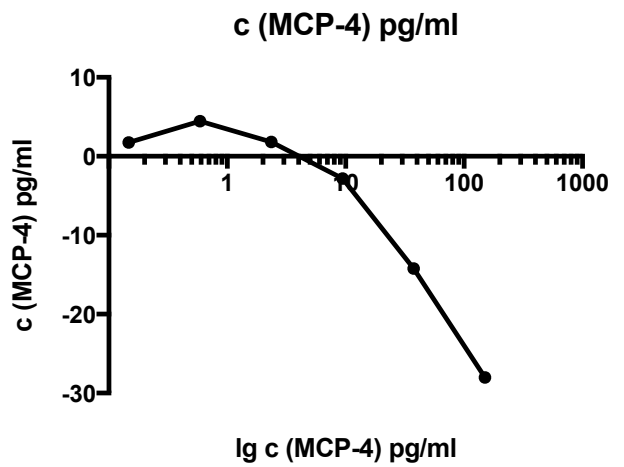

C) CSF dilution series

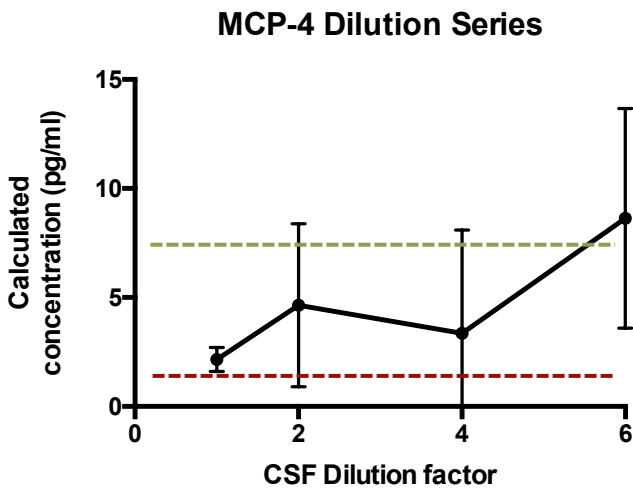

D) Test sample results

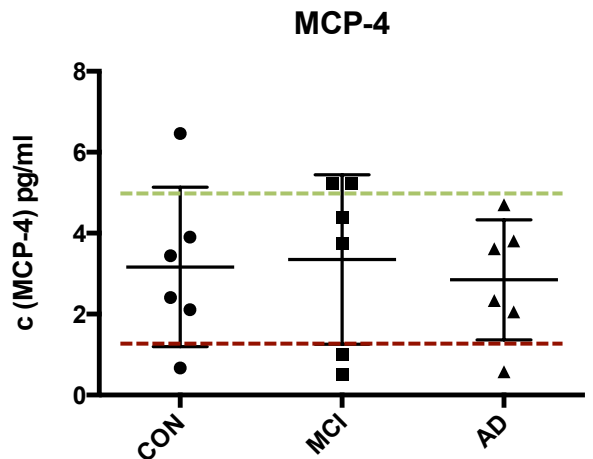

iv. Single analytes results

MDC (electrochemiluminescence multiplex; chemokine panel)

Evaluation: **Borderline**

Samples not detectable but might be drawn in detection range by spike-in of protein

- Spike-In-Curve has positive difference to standard curve
- Spike-In concentrations are linear only in the range of standard 6-8 at 20 pg/ml
- Sample concentrations < LLOQ (88.3 pg/ml)
- No significant difference between test samples

A) Spike In Curve

MDC Spike in

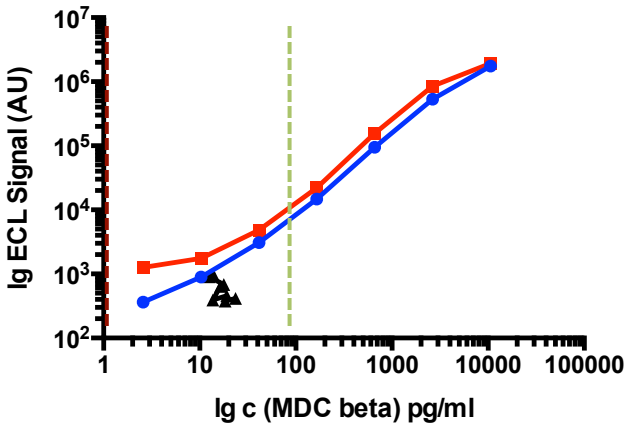

B) Recalculated concentrations curve

c (MDC) pg/ml

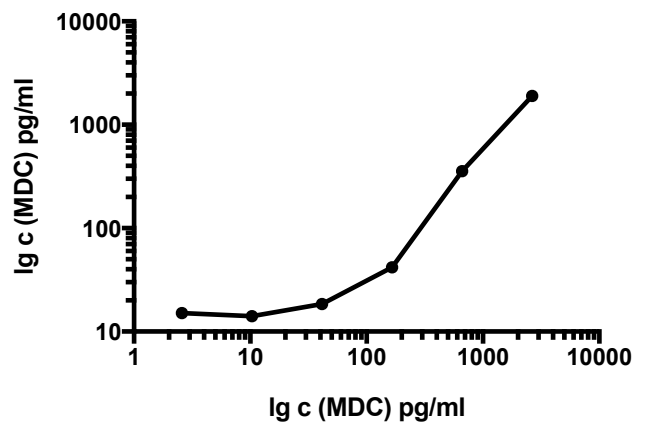

C) CSF dilution series

MDC Dilution Series

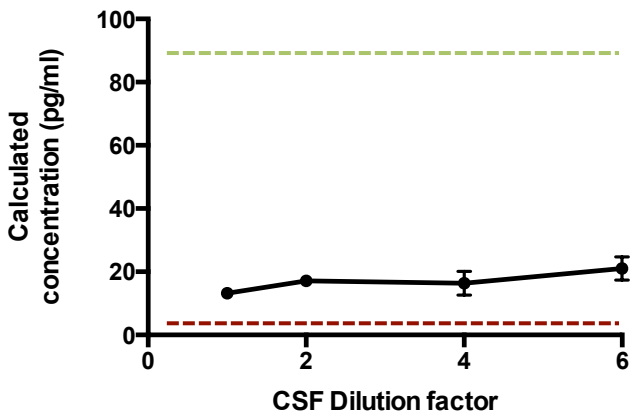

D) Test sample results

MDC

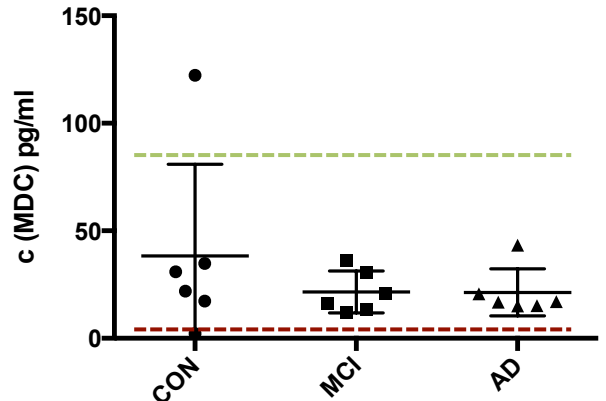

iv. Single analytes results

**MIF (electrochemiluminescence singleplex)**

Evaluation: **Passed**

Optimal dilution factor is 5x

- Spike-In-Curve has positive difference to standard curve
- Spike in Concentrations are linear in range of standard 4 – 8 at 1000 pg/ml (2x Dilution)
- Sample concentrations > LLOD (2.4 pg/ml)
- Sample concentrations in linear range
- All QC parameters passed
- No significant difference between test samples

**A) Spike In Curve**

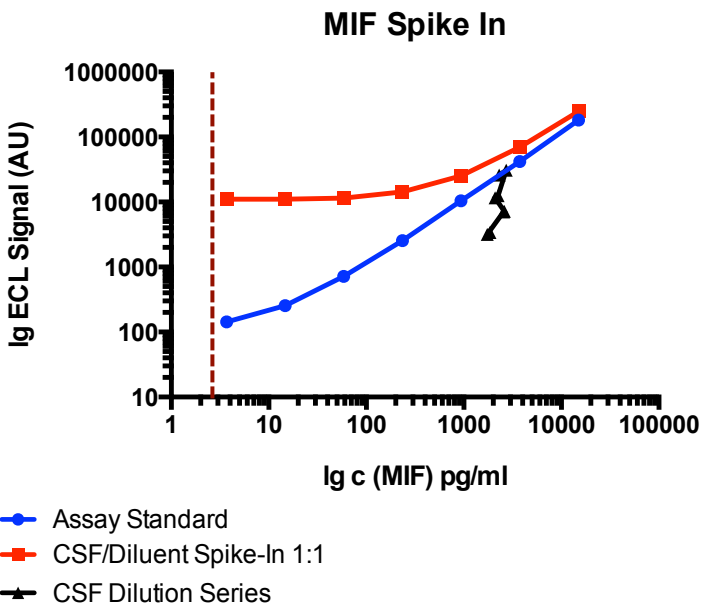

**B) Recalculated concentrations curve**

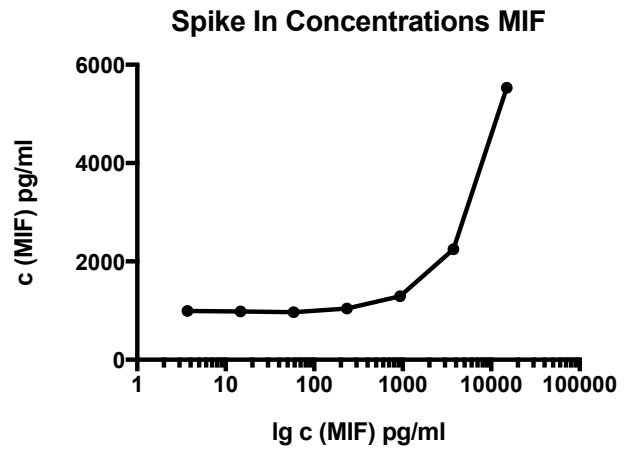

**C) CSF dilution series**

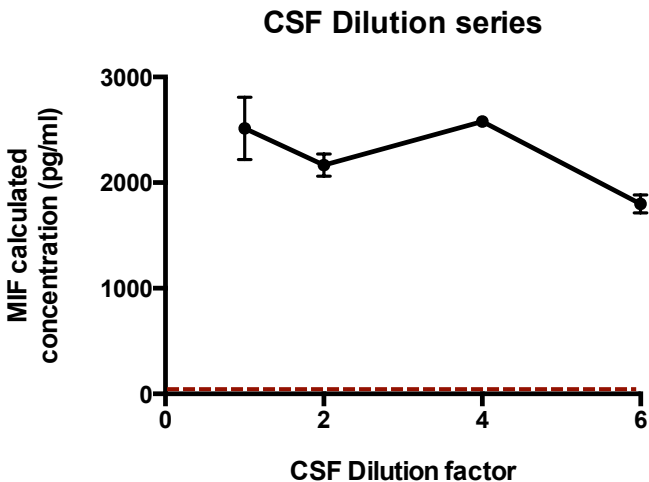

**D) Test sample results**

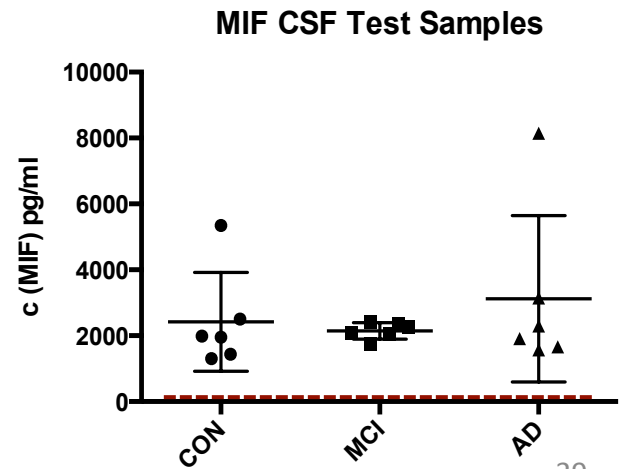

iv. Single analytes results

MIP-1 $\alpha$  (electrochemiluminescence multiplex; chemokine panel)

Evaluation: **Not passed**

Samples not detectable

- Spike-In-Curve has positive difference to standard curve
- Spike in Concentrations are nonlinear
- Sample concentrations < LLOQ (13.8 pg/ml)
- No significant difference between test samples

A) Spike In Curve

MIP-1 alpha Spike in

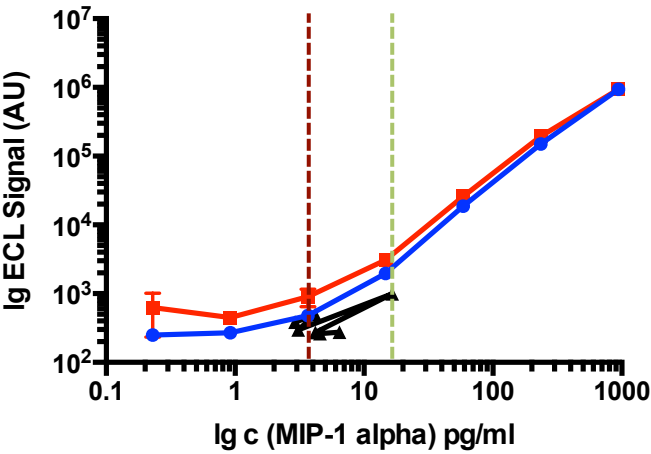

- Assay Standard
- CSF/Diluent Spike-In 1:1
- CSF Dilution Series

B) Recalculated concentrations curve

c (MIP-1 alpha) pg/ml

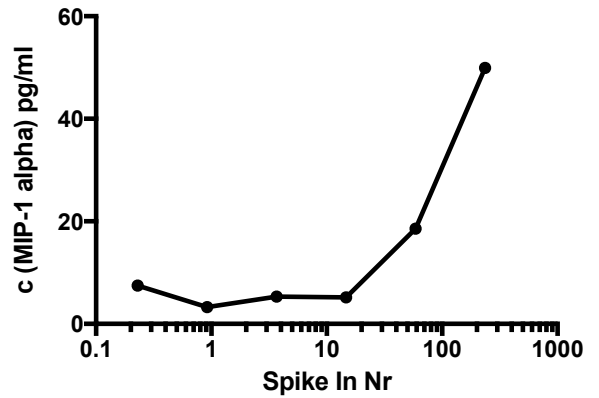

C) CSF dilution series

MIP-1 alpha Dilution Series

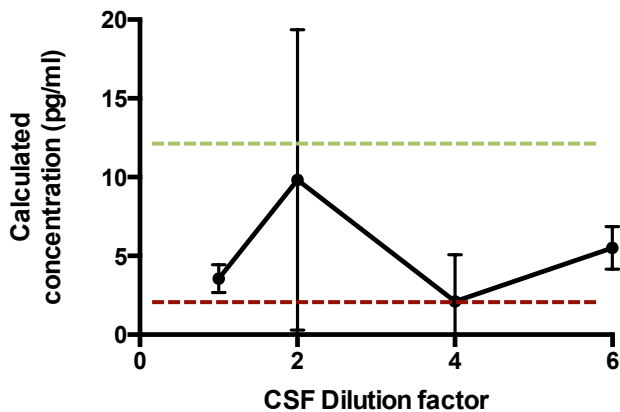

D) Test sample results

MIP-1  $\alpha$

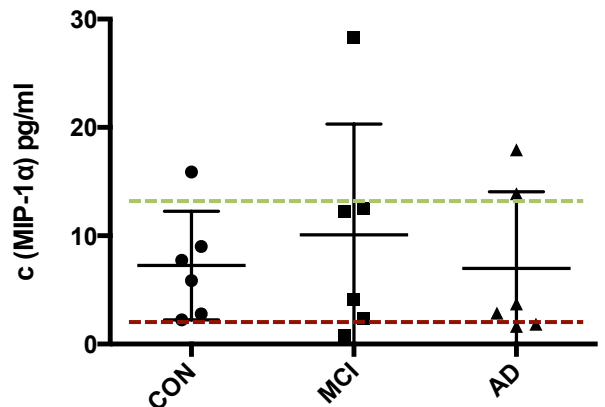



iv. Single analytes results

**MIP-1 $\beta$  (electrochemiluminescence multiplex; chemokine panel)**

**Evaluation:** Passed (close to borderline)

Optimal dilution factor is 2x; spike-in setup would probably improve detectability

- Spike-In-Curve has positive difference to standard curve
- Spike in Concentrations are linear in range of standard 4 – 7 at 5.0 pg/ml (2x Dilution)
- Sample concentrations > LLOD (2.27 pg/ml)
- Sample concentrations in linear range
- No significant difference between test samples

**A) Spike In Curve**

**MIP-1 beta Spike In**

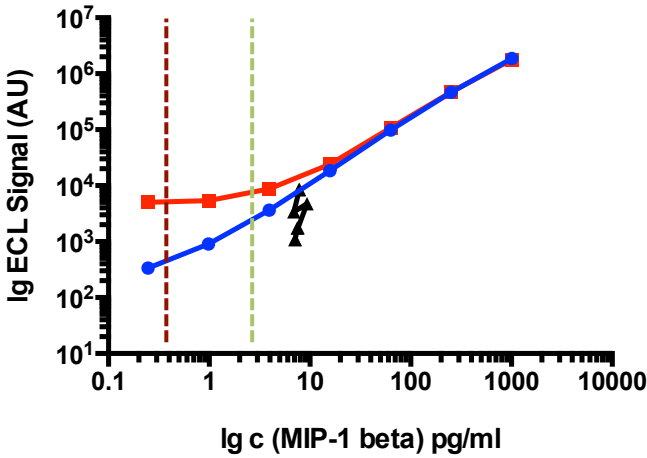

- Assay Standard
- CSF/Diluent Spike-In 1:1
- CSF Dilution Series

**B) Recalculated concentrations curve**

**c (MIP-1 beta) pg/ml**

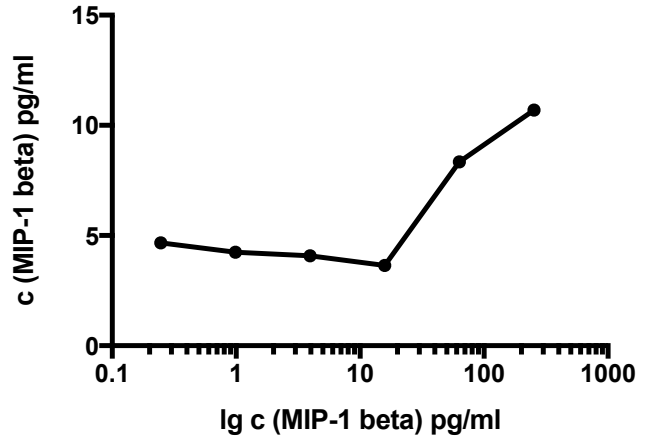

**C) CSF dilution series**

**MIP-1 beta Dilution Series**

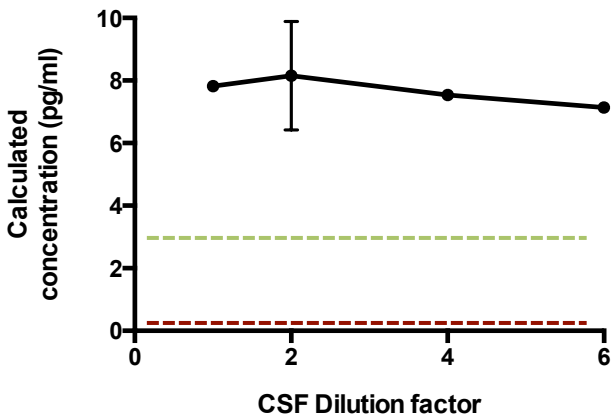

**D) Test sample results**

**MIP-1 $\beta$**

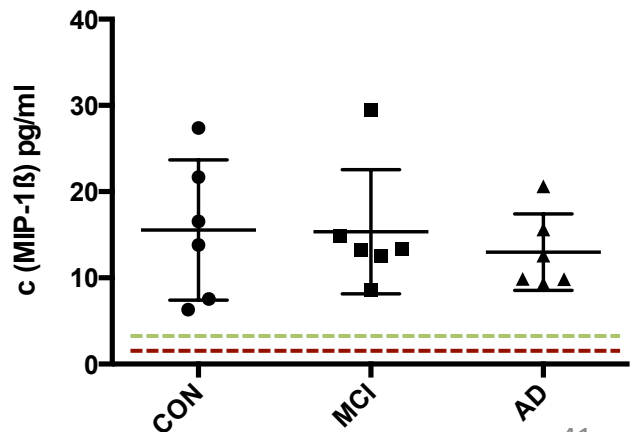

iv. Single analytes results

Mrp8/14 (colorimetric singleplex)

Evaluation: **Not passed**

Inconsistent CSF data

- Spike-In-Curve overlaps with standard curve (standard curve was extended in low range)
- Spike in Concentrations are nonlinear and equal to zero
- CSF signal low even in extended assay range
- For this analyte, data from a previous pilot study with larger numbers was used. Yet, 50% of samples were undetectable due to low CSF levels
- No significant difference between detectable test samples

A) Spike In Curve

Mrp8/14 Spike In

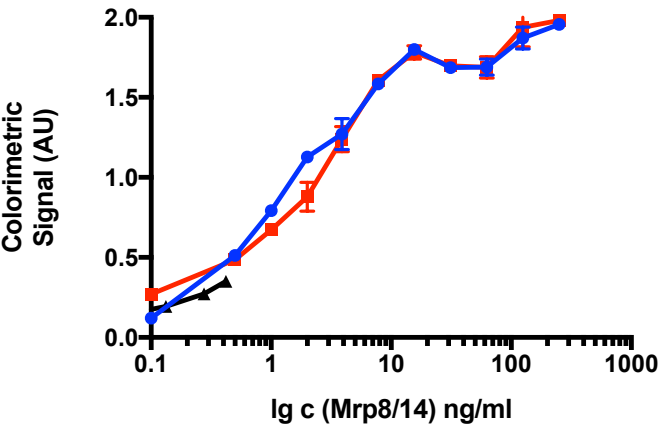

- Assay Standard
- CSF/Diluent Spike-In 1:1
- CSF Dilution Series

B) Recalculated concentrations curve

Spike In Concentrations Mrp8/14

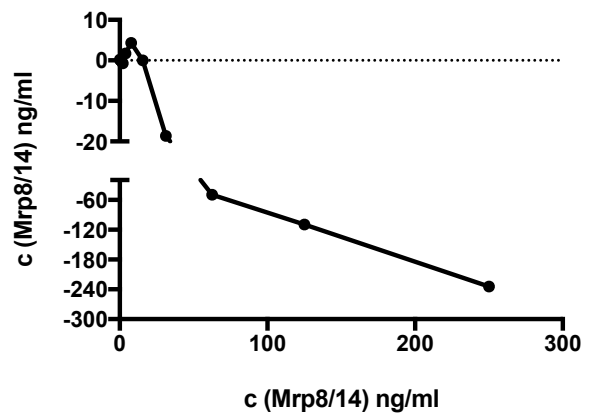

C) CSF dilution series

Mrp8/14 Dilution series

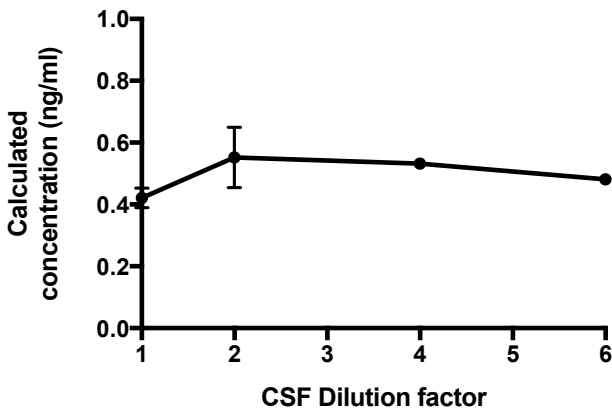

D) Test sample results

Group Comparison

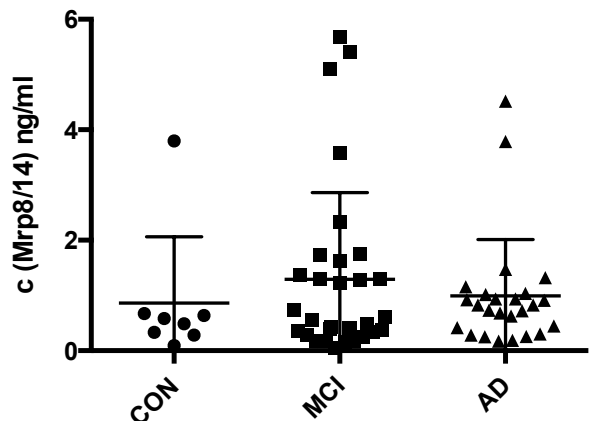

iv. Single analytes results

**PIGF (electrochemiluminescence multiplex; angiogenesis panel)**

Evaluation: **Passed**

Optimal dilution factor is 2-4x

- Spike-In-Curve has positive difference to standard curve
- Spike in Concentrations are linear in range of standard 4 – 8 at 50 pg/ml (2x Dilution)
- Sample concentrations > LLOQ (10.7 pg/ml)
- Sample concentrations in linear range
- No significant difference between test samples

A) Spike In Curve

**PIGF Spike in**

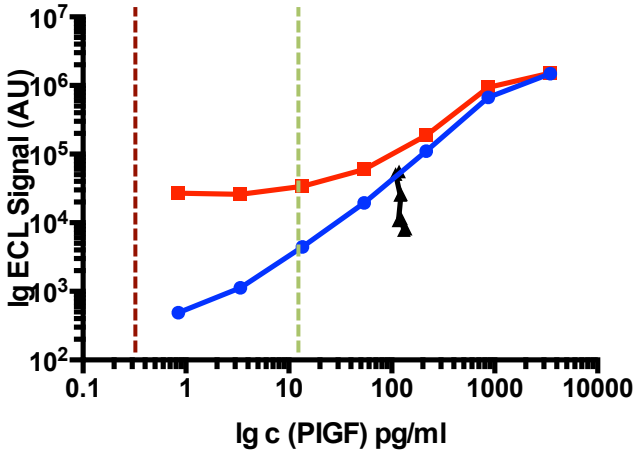

- Assay Standard
- CSF/Diluent Spike-In 1:1
- CSF Dilution Series

B) Recalculated concentrations curve

**c (PIGF) pg/ml**

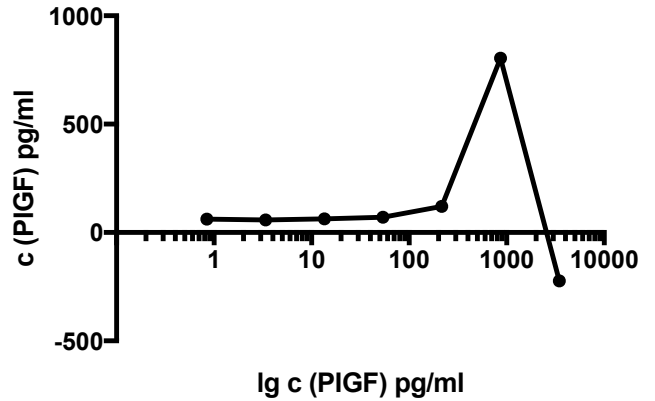

C) CSF dilution series

**PIGF Dilution Series**

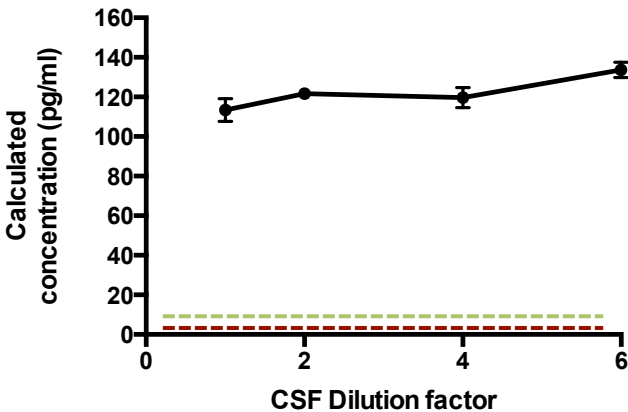

D) Test sample results

**PIGF**

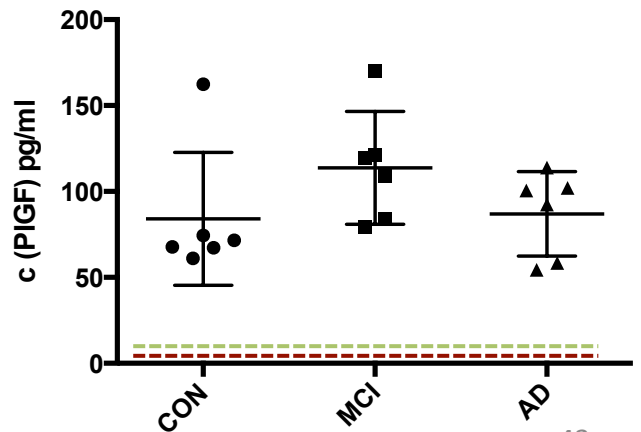

iv. Single analytes results

SAA (electrochemiluminescence multiplex; vascular injury panel)

Evaluation: **Passed**

Optimal dilution factor is 4-6x

- Spike-In-Curve has positive difference to standard curve
- Spike in Concentrations are linear in range of standard 3 – 8 at 20.000 pg/ml (2x Dilution)
- Sample concentrations > LLOQ (54.1 pg/ml)
- Sample concentrations in linear range
- All QC parameters passed
- No significant difference between test samples

A) Spike In Curve

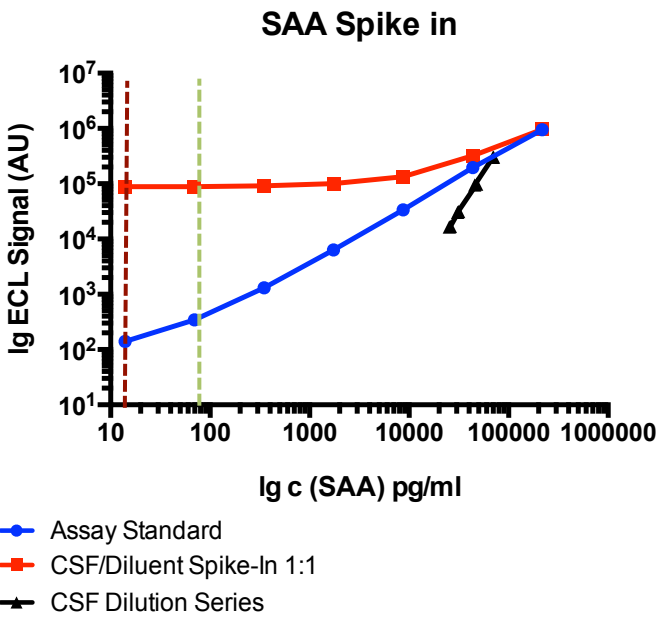

B) Recalculated concentrations curve

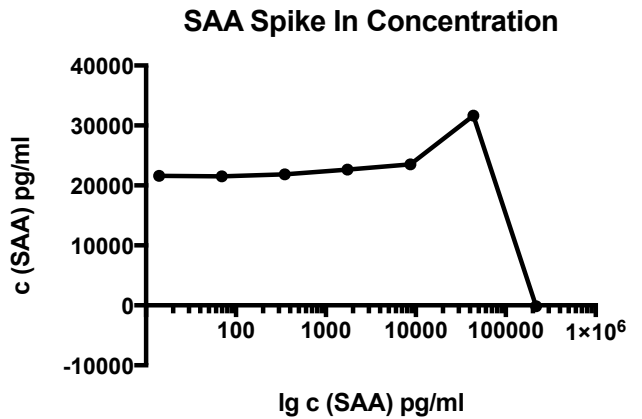

C) CSF dilution series

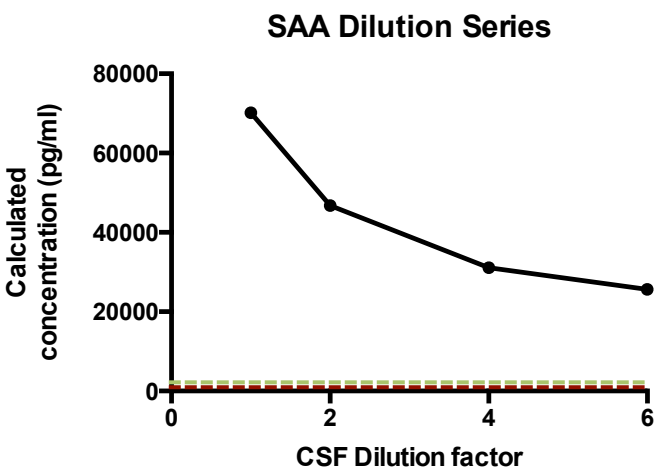

D) Test sample results

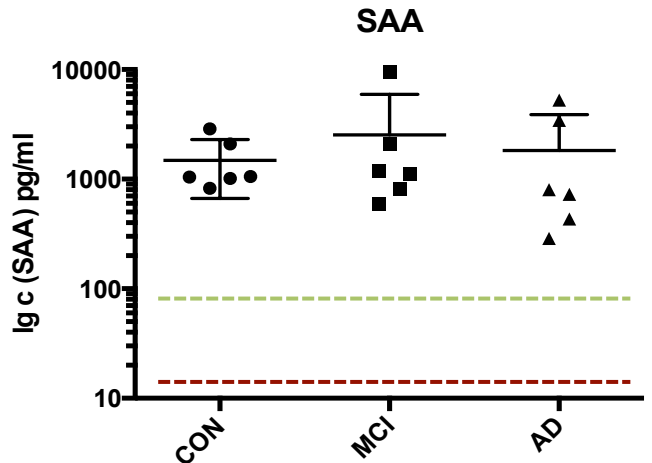

iv. Single analytes results

TARC (electrochemiluminescence multiplex; chemokine panel)

Evaluation: **Borderline**

Samples not detectable but might be drawn in detection range by spike-in of protein

- Spike-In-Curve has positive difference to standard curve
- Spike in Concentrations are linear in range of standard 4 – 8 at 4.0 pg/ml (2x Dilution)
- Sample concentrations overlap with LLOQ (3.32 pg/ml)
- Sample concentrations at borderline of quantitation
- No significant difference between test samples

A) Spike In Curve

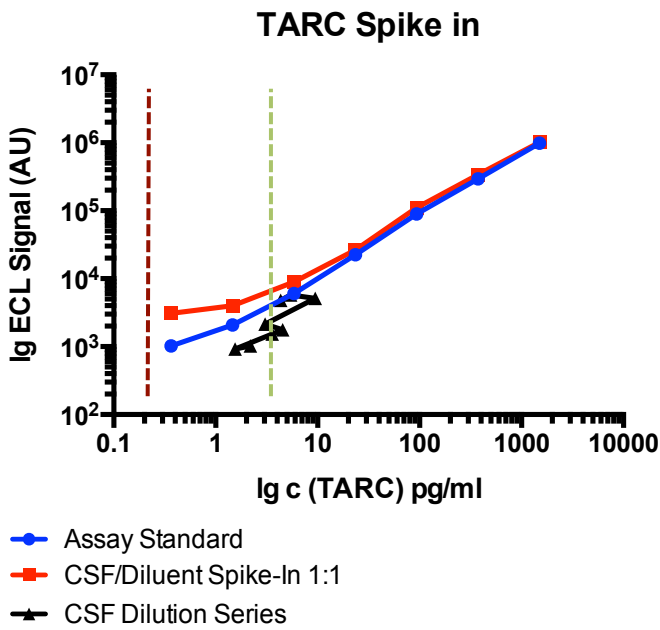

B) Recalculated concentrations curve

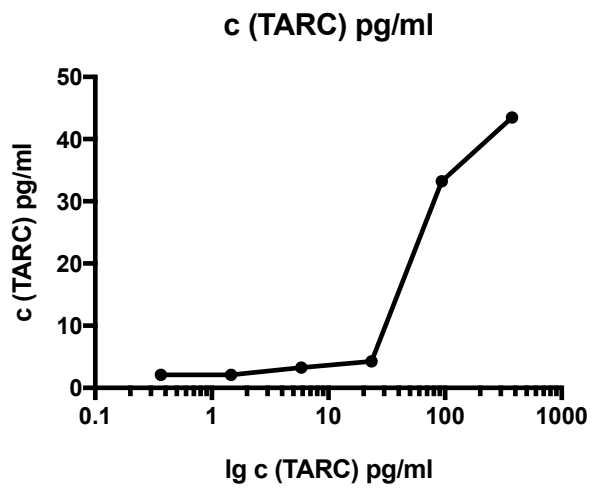

C) CSF dilution series

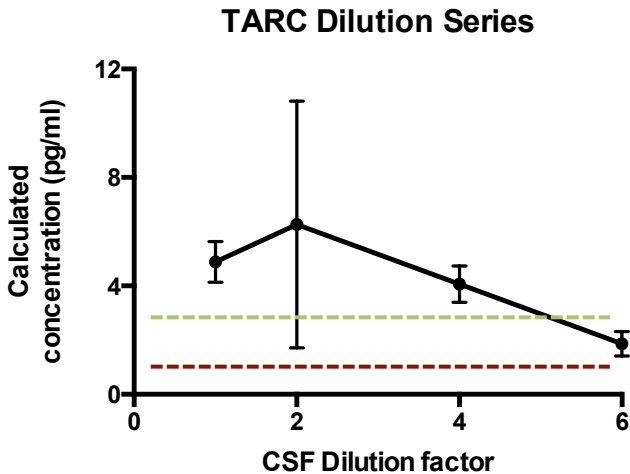

D) Test sample results

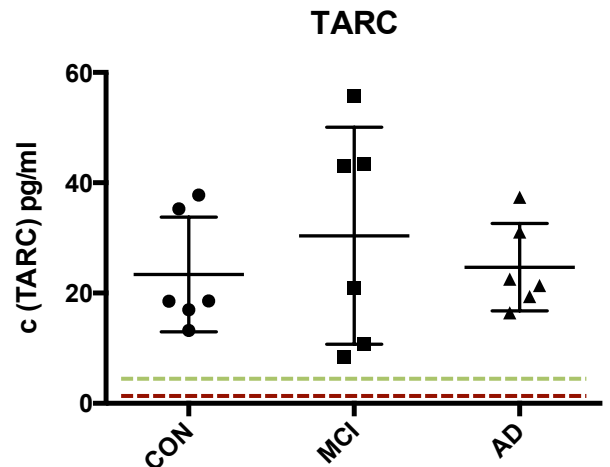

iv. Single analytes results

Tie-2 (electrochemiluminescence multiplex; angiogenesis panel)

Evaluation: **Not passed**

Samples not detectable

- Spike-In Curve has overlaps with standard curve
- Spike-In concentrations are close to 0 in range of standard 4 - 8
- Sample concentrations < LLOQ (396.0 pg/ml)
- No significant difference between test samples

A) Spike In Curve

Tie-2 Spike in

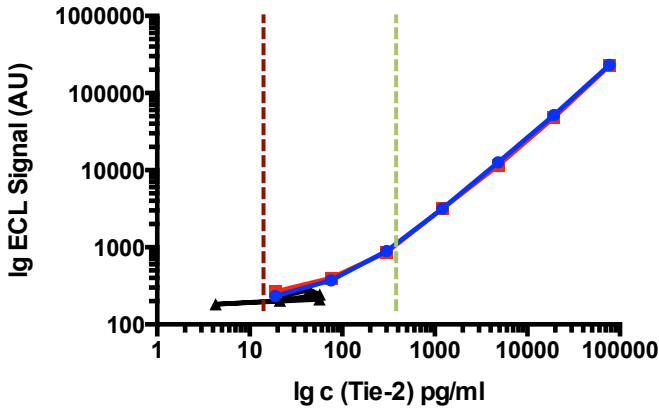

- Assay Standard
- CSF/Diluent Spike-In 1:1
- CSF Dilution Series

B) Recalculated concentrations curve

c (Tie-2) pg/ml

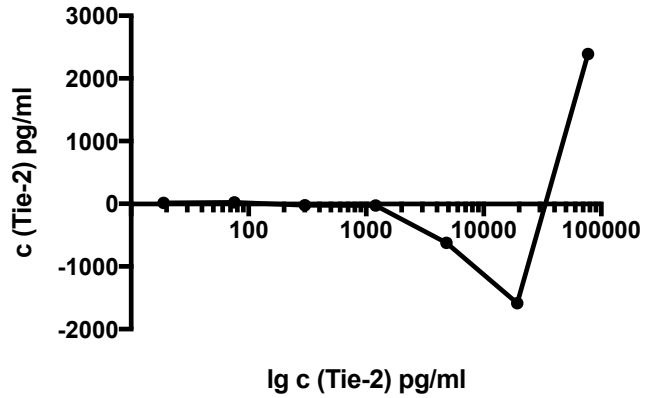

C) CSF dilution series

Tie-2 Dilution Series

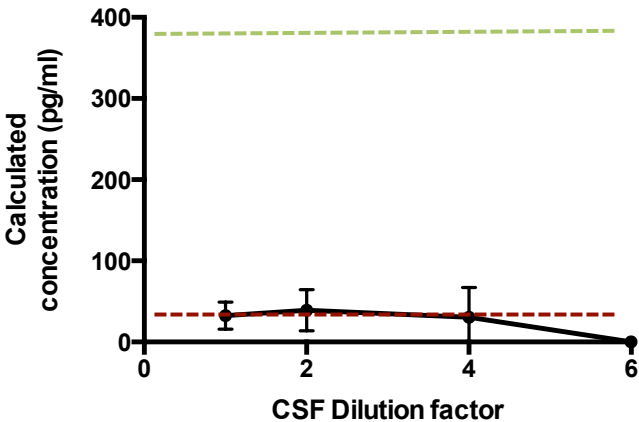

D) Test sample results

Tie-2

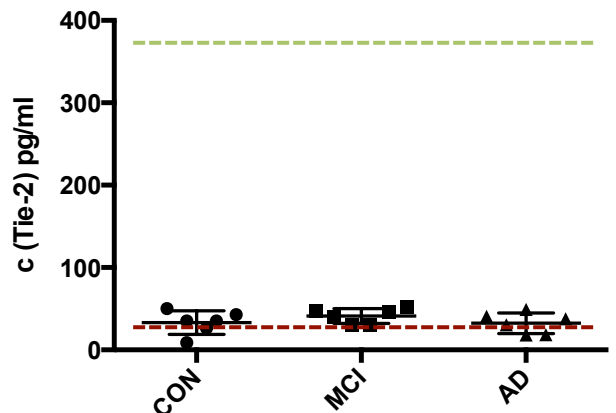

iv. Single analytes results

TNF- $\alpha$  (electrochemiluminescence multiplex; proinflammatory panel)

Evaluation: **Not passed**

Samples not detectable

- Spike-In-Curve overlaps with standard curve
- Spike in Concentrations are nonlinear
- Sample concentrations < LLOQ (0.69 pg/ml)
- No significant difference between test samples

A) Spike In Curve

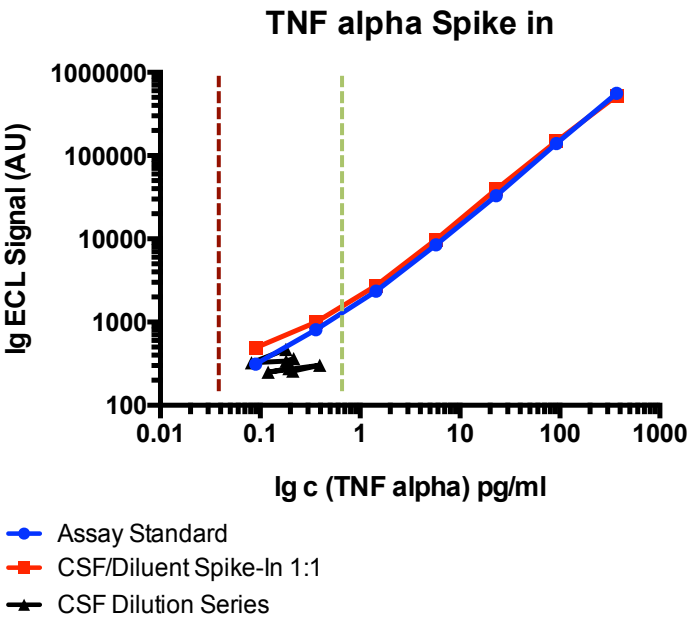

B) Recalculated concentrations curve

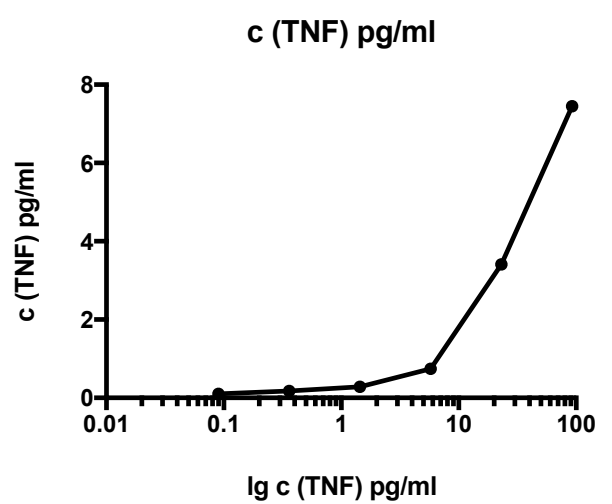

C) CSF dilution series

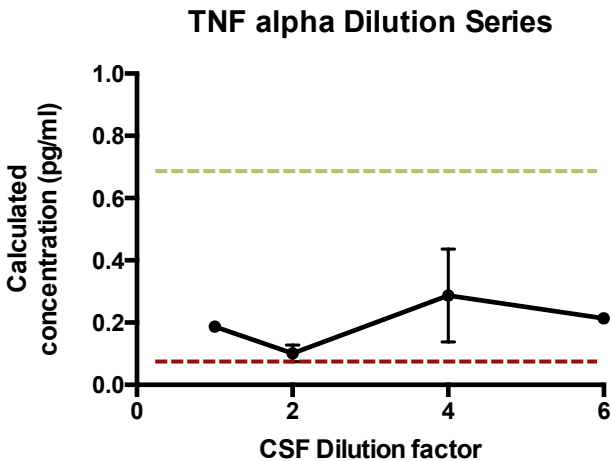

D) Test sample results

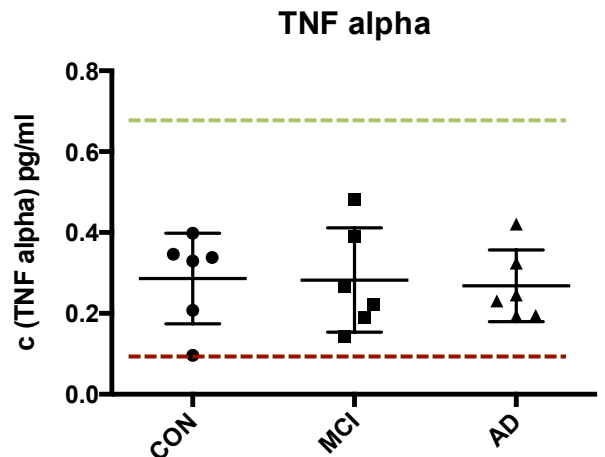

iv. Single analytes results

TNF- $\beta$  (electrochemiluminescence multiplex; cytokine panel)

Evaluation: **Not passed**

Samples not detectable

- Spike-In-Curve overlaps with standard curve
- Spike in Concentrations are nonlinear
- Sample concentrations < LLOQ (1.15 pg/ml)
- No significant differences between test samples

A) Spike In Curve

TNF beta Spike in

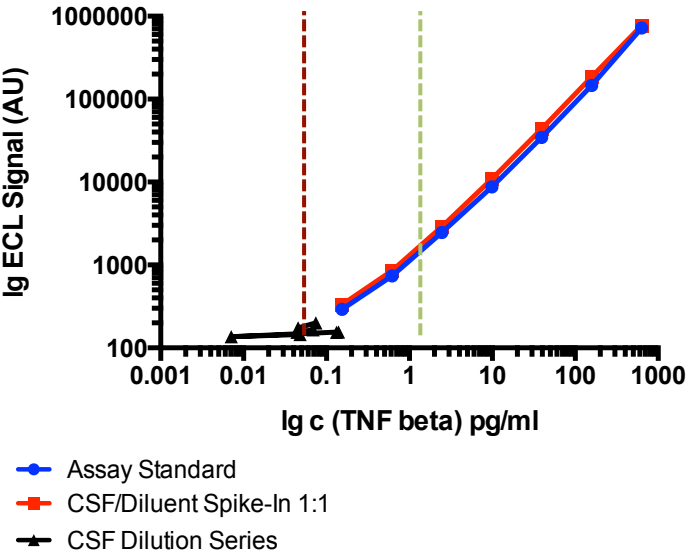

B) Recalculated concentrations curve

c (TNF beta) pg/ml

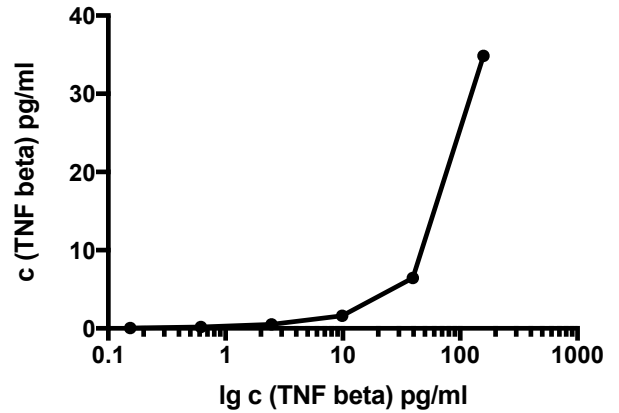

C) CSF dilution series

TNF beta Dilution Series

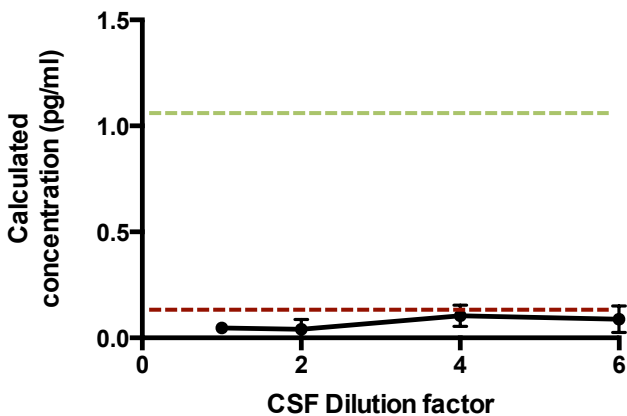

D) Test sample results

TNF- $\beta$

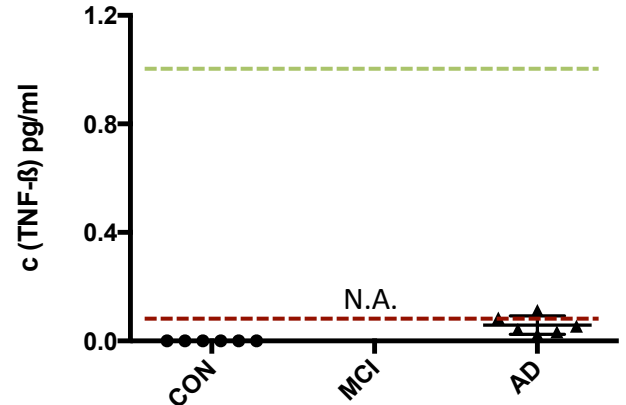



iv. Single analytes results

TREM2 (electrochemiluminescence singleplex)

Evaluation: **Passed**

Optimal dilution factor is 5x

- Spike-In-Curve has positive difference to standard curve
- Spike in Concentrations are in linear in range of standard 4 – 8 at 12.000 pg/ml (5x Dilution)
- Sample concentrations in linear range
- All QC parameters passed
- No significant difference between test samples

A) Spike In Curve

TREM2 Spike In

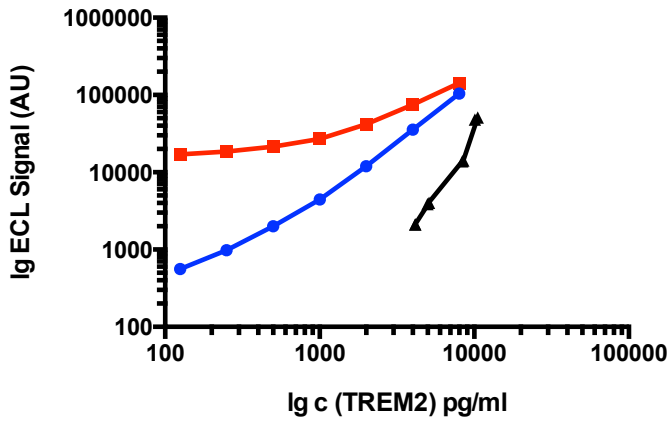

- Assay Standard
- CSF/Diluent Spike-In 1:1
- CSF Dilution Series

B) Recalculated concentrations curve

Spike In Concentrations TREM2

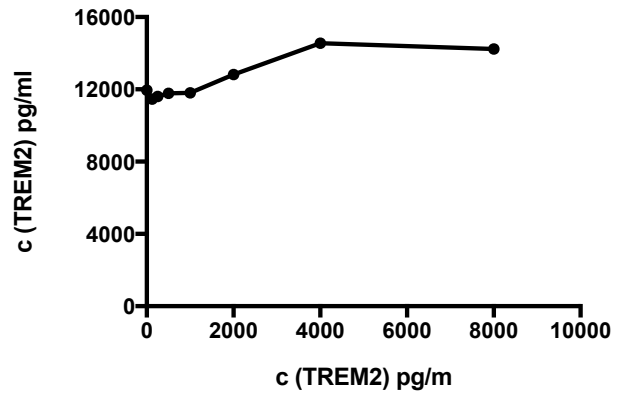

C) CSF dilution series

TREM2 Dilution series

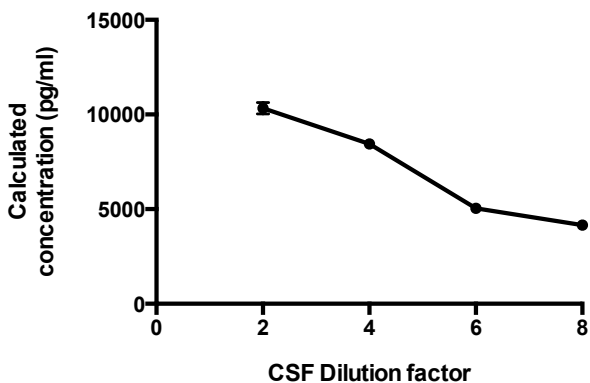

D) Test sample results

TREM2 CSF Test Samples

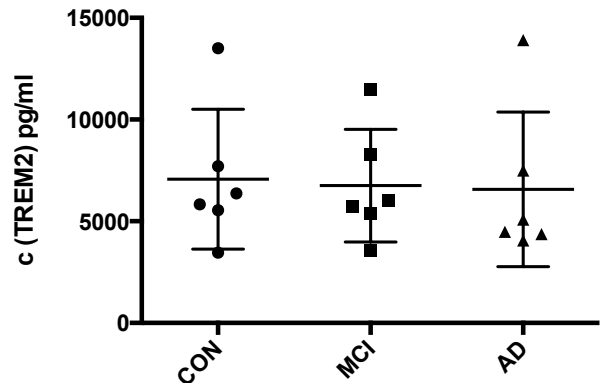

iv. Single analytes results

**VCAM-1 (electrochemiluminescence multiplex; vascular Injury Panel)**

**Evaluation: Passed**

Optimal dilution factor is >6x

- Spike-In-Curve has positive difference to standard curve
- Spike in Concentrations are linear in range of standard 2 – 8 at 5000 pg/ml (2x Dilution)
- Sample concentrations > LLOQ (37.6 pg/ml)
- Sample concentrations in linear range
- All QC parameters passed
- No significant difference between test samples

**A) Spike In Curve**

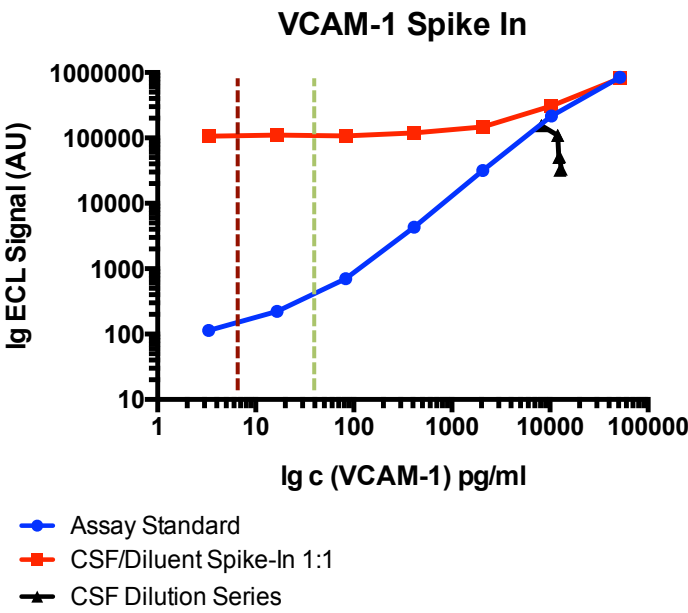

**B) Recalculated concentrations curve**

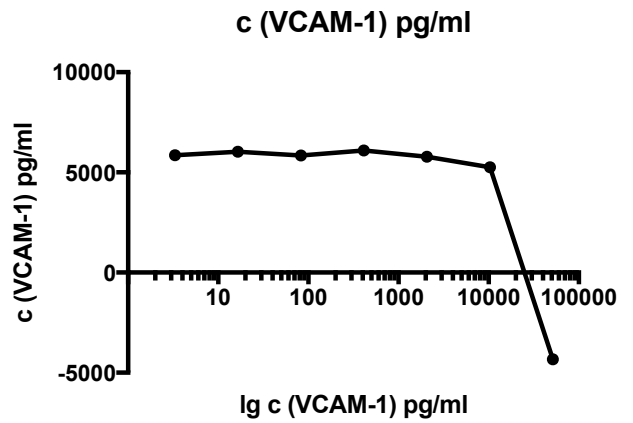

**C) CSF dilution series**

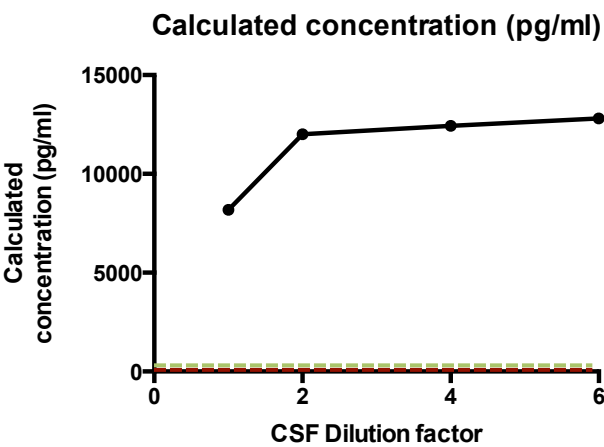

**D) Test sample results**

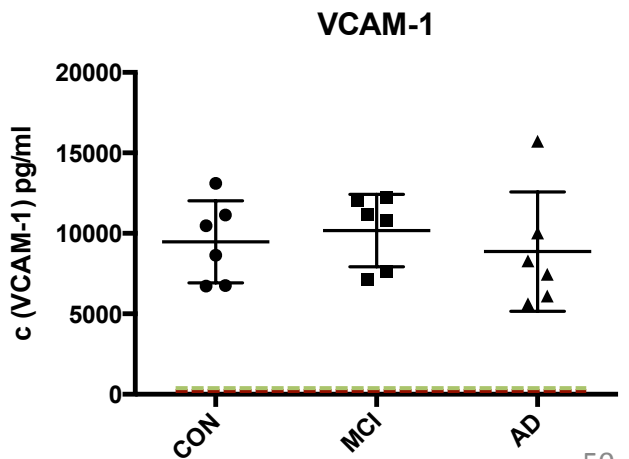

iv. Single analytes results

**VEGF (electrochemiluminescence multiplex; cytokine panel)**

Note: This assay was also tested as part of the angiogenesis panel (p. 52) where it was classified as borderline

Evaluation: **Not passed**

Samples not detectable

- Spike-In-Curve overlaps with standard curve
- Spike in Concentrations are nonlinear
- Sample concentrations < LLOQ (7.7 pg/ml)
- No significant difference between test samples ( $p = 0.06$  in nonparametric testing)

A) Spike In Curve

**VEGF Spike in**

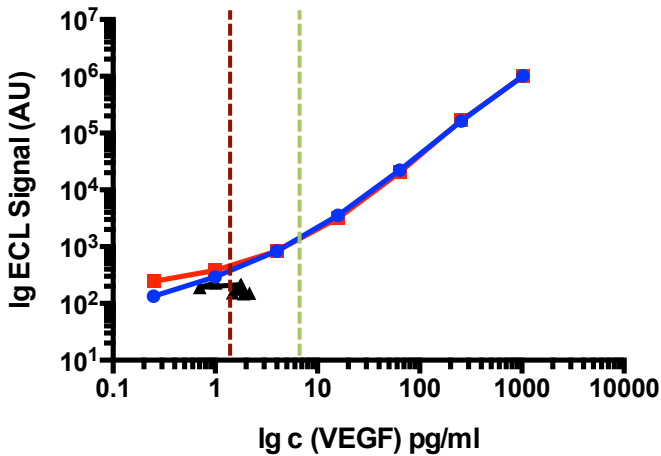

- Assay Standard
- CSF/Diluent Spike-In 1:1
- CSF Dilution Series

B) Recalculated concentrations curve

**c (VEGF) pg/ml**

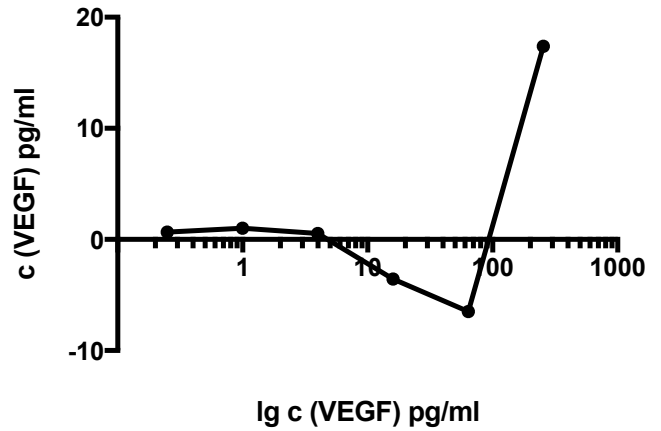

C) CSF dilution series

**VEGF Dilution Series**

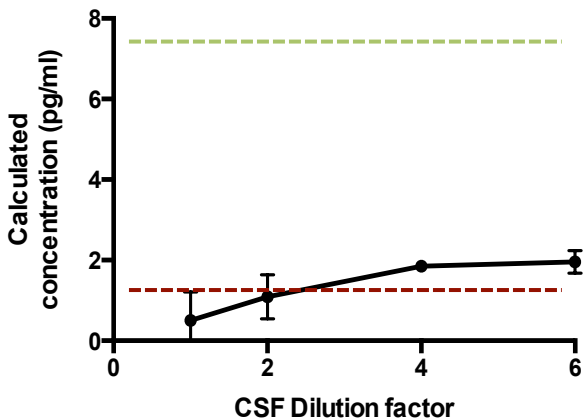

D) Test sample results

**VEGF**

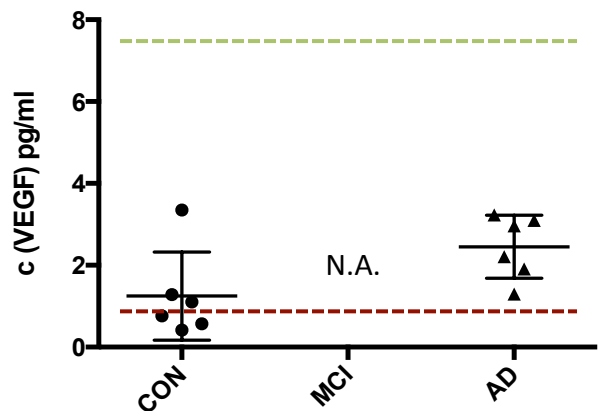

iv. Single analytes results

VEGF (electrochemiluminescence multiplex; angiogenesis panel)

Note: This assay was also tested as part of the cytokine panel (p. 51) where it was classified as not passed

Evaluation: **Borderline**

Samples not detectable but might be drawn in detection range by spike-in of protein

- Spike-In-Curve has positive difference to standard curve
- Spike in Concentrations are linear in range of standard 4 – 8 at 2.0 pg/ml (2x Dilution)
- Sample concentrations overlap with LLOQ (5.0 pg/ml)
- No significant difference between test samples

A) Spike In Curve

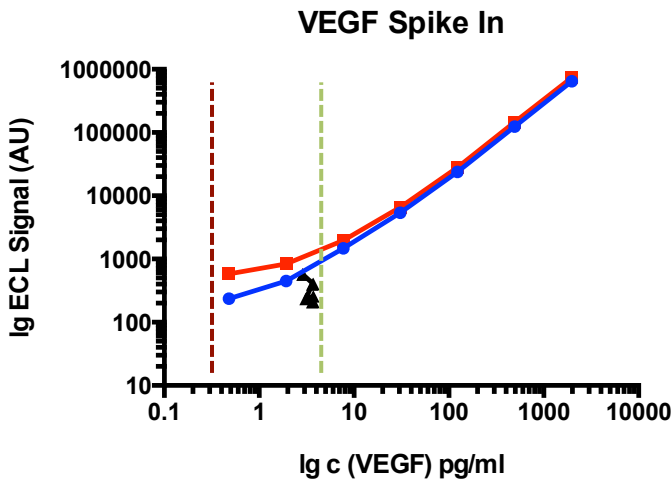

- Assay Standard
- CSF/Diluent Spike-In 1:1
- CSF Dilution Series

B) Recalculated concentrations curve

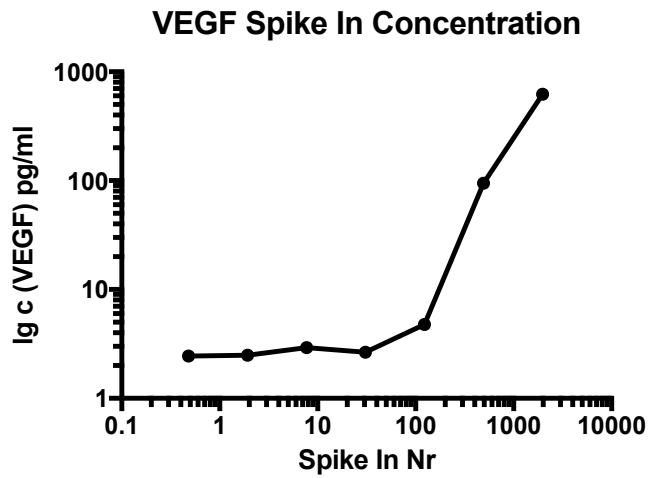

C) CSF dilution series

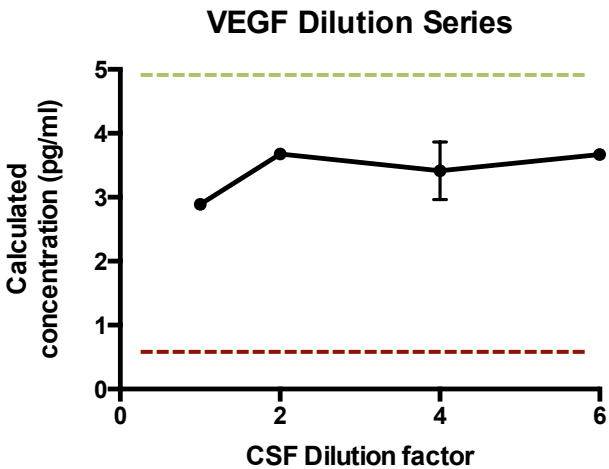

D) Test sample results

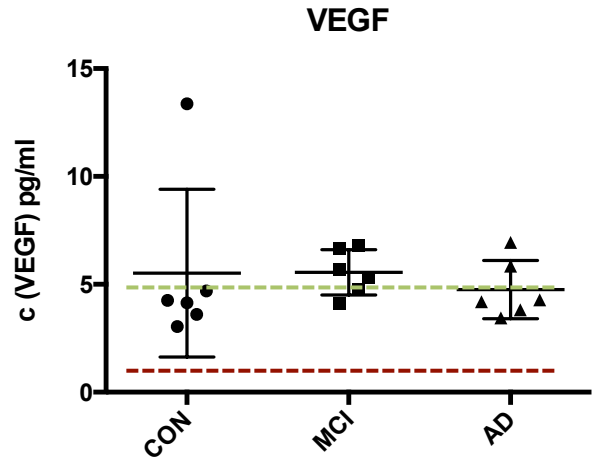

iv. Single analytes results

**VEGF-C (electrochemiluminescence multiplex; angiogenesis panel)**

**Evaluation: Not passed**

Samples not detectable

- Spike-In-Curve has positive difference to standard curve
- Spike in concentrations are nonlinear
- Sample concentrations < LLOD (11.1 pg/ml)
- No significant difference between test samples

**A) Spike In Curve**

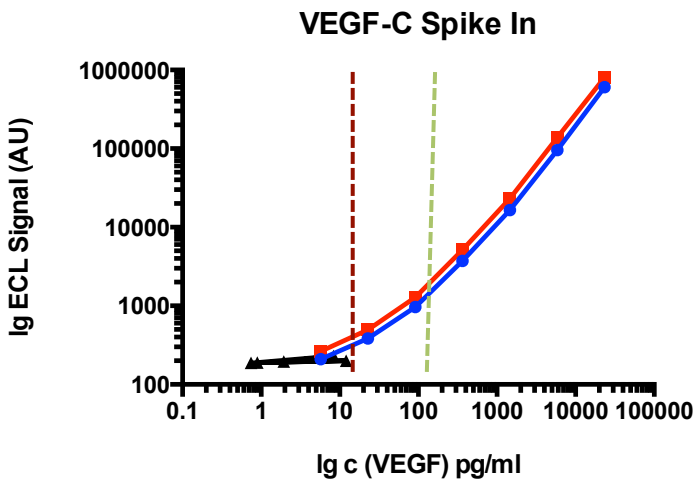

**B) Recalculated concentrations curve**

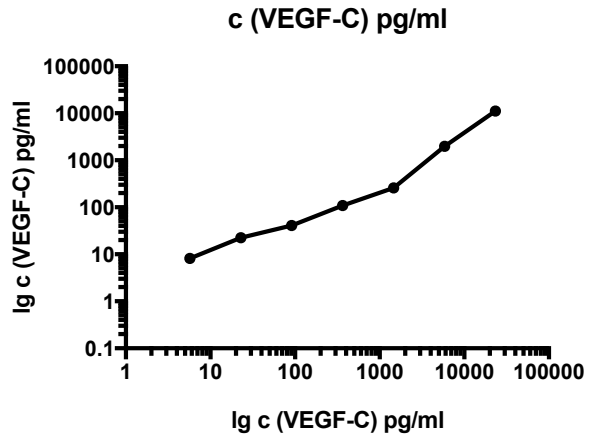

**C) CSF dilution series**

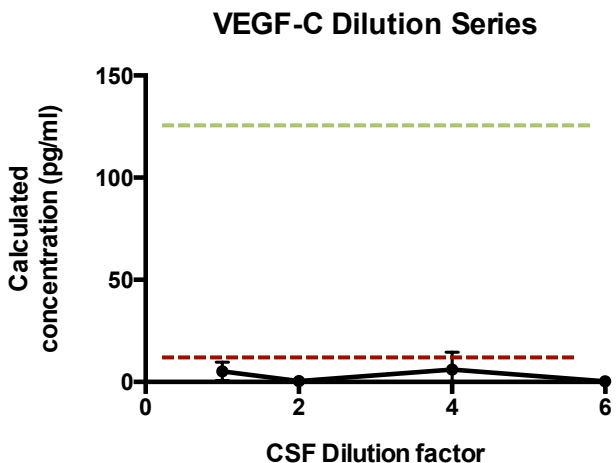

**D) Test sample results**

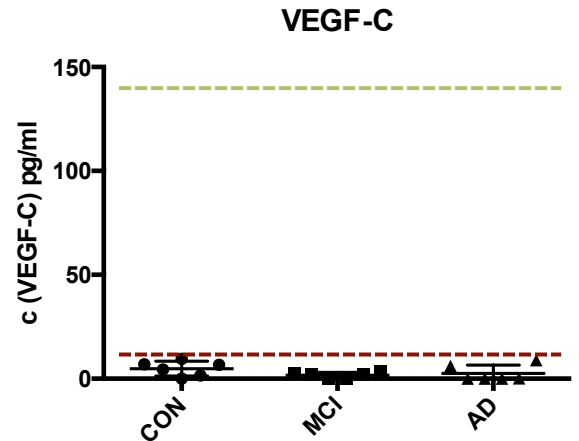

iv. Single analytes results

VEGF-D (electrochemiluminescence multiplex; angiogenesis panel)

Evaluation: **Not passed**

Samples not detectable

- Spike-In-Curve has positive difference to standard curve
- Spike-In concentrations are nonlinear
- Sample concentrations < LLOQ (67.1 pg/ml)
- No significant difference between test samples

A) Spike In Curve

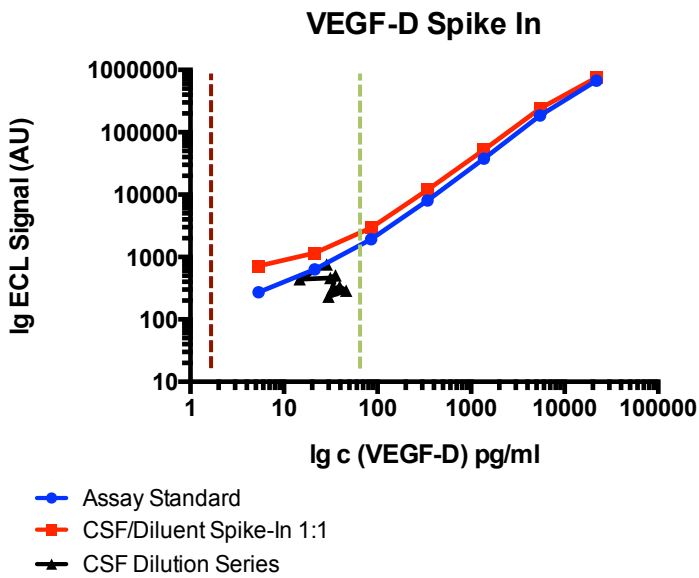

B) Recalculated concentrations curve

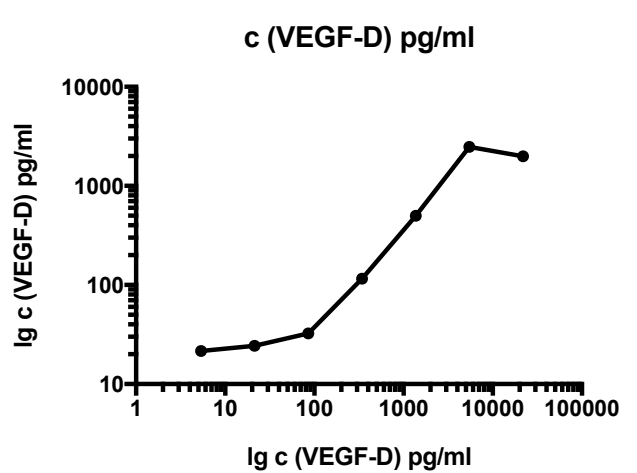

C) CSF dilution series

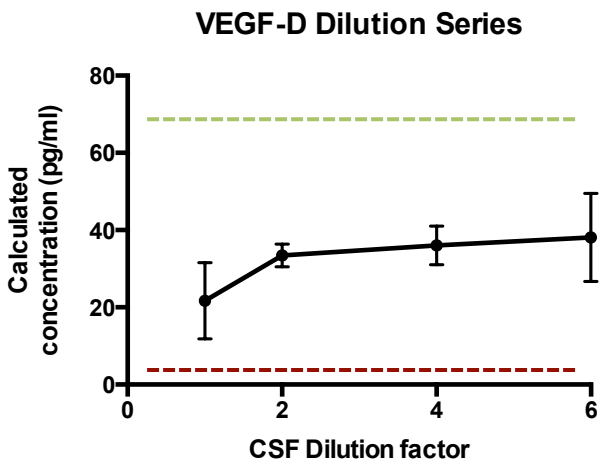

D) Test sample results

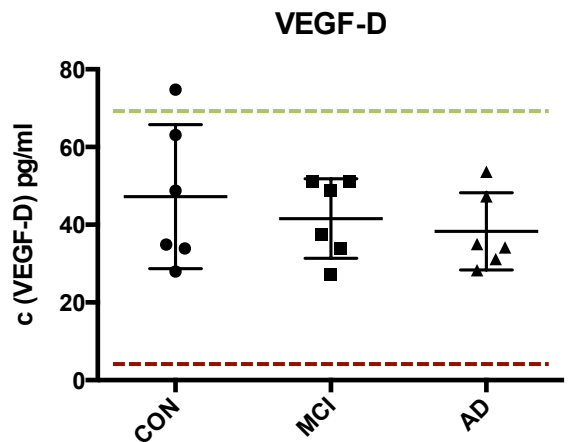

Supplement: MOESM1 [file 15494988]
